# Supplementary material for: Corannulene-based acenes
Source: Royal Society of Chemistry journal article supplement (doi:10.1039/d2qo01096h), 2022-01-01
Supplement: d2qo01096h1.pdf [file d2qo01096h1.pdf]

## Supporting Information

### Corannulene-Based Acenes

Qi Xu,<sup>1,2</sup> Chu Wang,<sup>1</sup> Xuebo Chen,<sup>1</sup> Ying Wang,<sup>1</sup> Zhenyao Shen<sup>2</sup> and Hua Jiang\*<sup>1</sup>

<sup>1</sup> College of Chemistry, Beijing Normal University, Beijing 100875, P. R. China

<sup>2</sup> School of Environment, Beijing Normal University, Beijing 100875, P. R. China

\*E-mail: [jiangh@bnu.edu.cn](mailto:jiangh@bnu.edu.cn)

## CONTENTS

|                                                                                         |    |
|-----------------------------------------------------------------------------------------|----|
| 1. General Procedures and Materials .....                                               | 3  |
| 2. Synthesis .....                                                                      | 3  |
| 3 X-ray Crystallography.....                                                            | 7  |
| 4 Photophysical Study.....                                                              | 13 |
| 5 CV and DPV Experiments .....                                                          | 14 |
| 6 Diels-Alder reactions between <b>CORA-monPA/bisPA</b> and <b>C<sub>60</sub></b> ..... | 14 |
| 7 Computational Method.....                                                             | 16 |
| 8 NMR and Mass Spectra .....                                                            | 59 |
| 9 Reference.....                                                                        | 65 |

## 1. General Procedures and Materials

Unless otherwise noted, all materials including dry solvent were obtained from commercial suppliers and used without further purification. All reactions were performed with dry solvents under Argon in dried glassware with standard vacuum-line techniques. Work-up and purification procedures were carried out with reagent-grade solvents under air.

Analytical TLC was carried out using tapered silica plates with a preadsorbent zone. NMR spectra were recorded on JOEL 400 MHz and JOEL 600 MHz. Chemical shifts were reported relative to the standard solvent signals on literature. The chemical shift references were as follows: ( $^1\text{H}$ ) dichloromethane-*d*, 5.32 ppm; ( $^{13}\text{C}$ ) dichloromethane-*d*, 53.84; ( $^1\text{H}$ ) chloroform-*d*, 7.26 ppm; ( $^{13}\text{C}$ ) chloroform-*d*, 77.16 ppm. Mass spectra (ESI, MALDI-TOF) were acquired on GCT and FT-ICR spectrometer (Bruker Daltonics Inc. APEXII, BIFLEX III), respectively. Emission spectrum were measured on FS5 and FLS980, and UV-Vis spectrum were recorded on Shimadzu UV-3600.

## 2. Synthesis

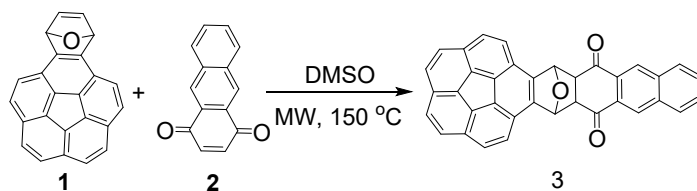

Into to an oven-dried (10-20 mL) glass reaction vial equipped with a Teflon coated magnetic stirring bar was placed **1** (150 mg, 0.47 mmol), **2** (200 mg, 0.96 mmol) and 3,6-di-(2-pyridyl)-1,2,4,5-tetrazine (225 mg, 0.95 mmol). The vial was then sealed with a PTFE-Silicon septum in an Intellivent Cap and purged repeatedly with argon. Anhydrous DMSO (10 mL) was added to this solid mixture, and the vial was then irradiated with microwaves in a CEM Discover Microwave Unit, at 150 °C for 1 hour under argon atmosphere. The reaction mixture was cooled and then washed with excess methylene chloride, washed well with water. Removal of the solvent under reduced pressure and purified by column chromatography on  $\text{SiO}_2$  (DCM/EA = 10/1, v/v,  $R_f = 0.30$ .) to give **3** (156 mg, 66 %) as a yellow solid. m.p. > 300 °C.  $^1\text{H}$  NMR (600 MHz, Chloroform-*d*, 298 K)  $\delta$ : 7.84-7.82 (d,  $J = 8.7$  Hz, 2 H), 7.70-7.68 (d,  $J = 8.7$  Hz, 2 H), 7.50-7.49 (d,  $J = 8.5$  Hz, 2 H), 7.23-7.22 (d,  $J = 8.6$  Hz, 2 H), 7.12-7.11 (dd,  $J_1 = 6.3$  Hz,  $J_2 = 3.1$  Hz, 2 H), 6.73-6.71 (dd,  $J_1 = 6.1$  Hz,  $J_2 = 3.3$  Hz, 2 H), 6.53-

6.52 (dd,  $J_1 = 3.6$ ,  $J_2 = 1.9$  Hz, 2 H), 6.51 (s, 2 H), 3.88-3.87 (dd,  $J_1 = 3.8$  Hz,  $J_2 = 1.8$  Hz, 2 H).  $^{13}\text{C}$  (100 MHz,  $\text{CDCl}_3$ , 298 K)  $\delta$ : 193.5, 141.8, 140.1, 136.9, 135.7, 134.3, 132.9, 131.9, 130.3, 129.7, 129.6, 129.5, 129.0, 127.9, 127.6, 127.5, 127.3, 127.1, 126.8, 126.3, 126.1, 125.0, 124.6, 83.0, 53.5, 50.8. HR-MS (ESI): Exact mass calculated for  $[\text{C}_{36}\text{H}_{19}\text{O}_3]^+$ :  $m/z = 499.1256$ , found:  $m/z (\%) = 499.1707$  (100).

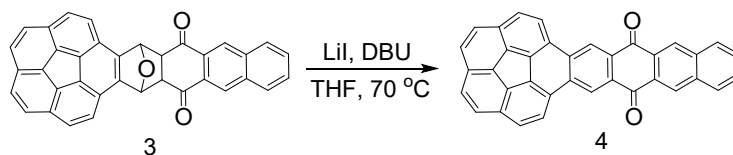

A suspension of **3** (50 mg, 0.1 mmol), DBU (0.15 mL, 1 mmol) and LiI (15 mg, 0.11 mmol) in dry THF (20 mL) was refluxed for 3 h. After cooling the reaction mixture to room temperature, the resulting yellow crude mixture was filtered and the residue washed with 100 mL THF, 50 mL  $\text{H}_2\text{O}$  and 50 mL methanol. After drying in vacuum 41 mg of yellow solid **4** (Yield: 82 %) could be isolated. m.p. > 300 °C. Very low solubility of **4** in common deuterated solvents prevented its characterization by NMR.

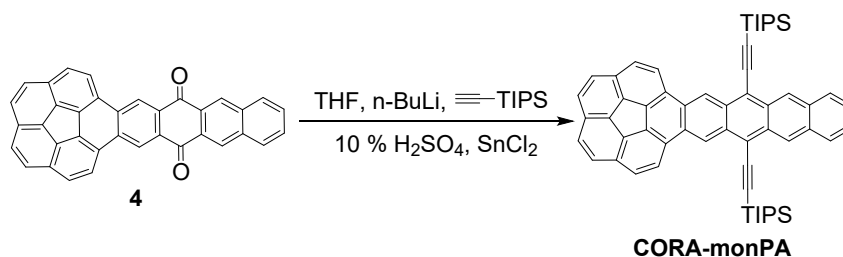

To a solution of 0.285 mL (0.127 mmol) of triisopropylsilyl acetylene in 3 mL dry hexane cooled to -10 °C was added 0.75 mL *n*-BuLi (1.6 M in hexane, 1.2 mmol) drop wise. After stirring for 1 h at -10 °C, the solution was diluted with 8 mL of dry hexane and 2 mL of dry THF and 40 mg (0.083 mmol) **4** was added in portions. The resulting suspension was stirred for at least 2 h at -10 °C and then at RT for 20 h. 2.5 mL of a degassed 10 %  $\text{H}_2\text{SO}_4$  was added and the mixture was stirred for 5 min at RT and then 150 mg  $\text{SnCl}_2$  (0.79 mmol) was added. The resulting red mixture was stirred for 1 h in the dark at RT, excess with 200 mL DCM and subjected to  $\text{H}_2\text{O}$  workup (3 x 200 mL). The organic fractions were separated and solvent was removed on a rotary evaporator. The crude product was purified by column chromatography on  $\text{SiO}_2$  (PE/DCM = 5/1, v/v,  $R_f = 0.25$ .) to give **CORA-monPA** (20 mg, 30 %) as a black solid. m.p. > 300 °C.  $^1\text{H}$  NMR (400 MHz, Chloroform-*d*, 298 K)  $\delta$ : 9.85 (s, 2 H), 9.42 (s, 2 H), 8.29-8.27 (d,  $J = 8.6$  Hz, 2 H), 8.09-8.06 (dd,  $J_1 = 6.5$  Hz,  $J_2 = 3.3$  Hz, 2 H), 7.97-7.95 (d,  $J = 8.6$  Hz, 2 H), 7.85-7.78 (m, 4 H), 7.52-7.50 (dd,  $J_1 = 6.7$  Hz,  $J_2 = 3.1$  Hz, 2 H), 1.46-4.45 (42 H).  $^{13}\text{C}$  (100 MHz,  $\text{CDCl}_3$ , 298 K)  $\delta$ : 135.7, 132.8, 132.4,

131.0, 130.8, 130.7, 129.2, 128.8, 127.9, 127.2, 126.5, 126.3, 124.1, 123.8, 118.9, 107.0, 104.4, 19.2, 11.9. HR-MS (MALDI-TOF): Exact mass calculated for  $[C_{58}H_{58}Si_2]$ :  $m/z = 810.4077$ , found:  $m/z (\%) = 810.3805 (100)$ .

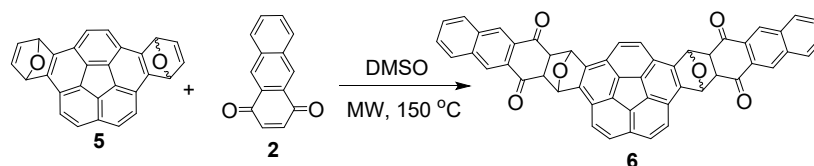

Into to an oven-dried (10-20 mL) glass reaction vial equipped with a Teflon coated magnetic stirring bar was placed **5** (147 mg, 0.39 mmol), **2** (300 mg, 1.44 mmol) and 3,6-di-(2-pyridyl)-1,2,4,5-tetrazine (250 mg, 1.06 mmol). The vial was then sealed with a PTFE-Silicon septum in an Intellivent Cap and purged repeatedly with argon. Anhydrous DMSO (20 mL) was added to this solid mixture, and the vial was then irradiated with microwaves in a CEM Discover Microwave Unit, at 150 °C for 1 hour under argon atmosphere. The reaction mixture was cooled and then washed with excess methylene chloride, washed well with water. Removal of the solvent under reduced pressure and purified by column chromatography on  $SiO_2$  (DCM/EA = 8/1, v/v,  $R_f = 0.30$ .) to give **6** (134 mg, 46 %) as a yellow solid. m.p. > 300 °C.  $^1H$  NMR (600 MHz,  $CD_2Cl_2$ , 298 K)  $\delta$ : 8.57 (s, 1 H), 8.24 (d,  $J = 1.3$  Hz, 2 H), 8.02 (d,  $J = 1.3$  Hz, 4 H), 7.84-7.82 (d,  $J = 8.7$  Hz, 3 H), 7.77-7.76 (d,  $J = 8.5$  Hz, 3H), 7.66-7.65 (d,  $J = 3.4$  Hz, 4H), 7.64 (s, 1 H), 7.61-7.58 (dd,  $J_1 = 8.5$  Hz,  $J_2 = 4.5$  Hz, 6 H), 7.28-7.27 (m, 4 H), 7.04 (s 1 H), 6.97-6.94 (2 H), .68 (m, 2 H), 6.56-6.53 (m, 5 H), 6.46-6.43 (m, 8 H), 6.33 (d,  $J = 0.8$  Hz, 2H), 3.81 (dt,  $J_1 = 4.0$  Hz,  $J_2 = 1.4$  Hz, 4H).  $^{13}C$  (100 MHz,  $CDCl_3$ , 298 K)  $\delta$ : 193.8, 193.7, 184.7, 171.2, 141.8, 141.7, 140.1, 137.7, 136.7, 135.2, 135.0, 134.9, 133.9, 133.7, 131.9, 131.7, 130.3, 129.6, 128.9, 128.7, 128.4, 127.9, 127.8, 127.5, 127.4, 127.1, 126.9, 126.6, 126.0, 125.6, 125.3, 124.9, 124.5, 124.2, 123.2, 123.1, 123.0, 83.2, 83.0, 60.5, 51.0, 50.8, 21.1, 14.3. HR-MS (ESI): Exact mass calculated for  $[C_{52}H_{27}O_6]^+$ :  $m/z = 747.1729$ , found:  $m/z (\%) = 747.3087 (100)$ .

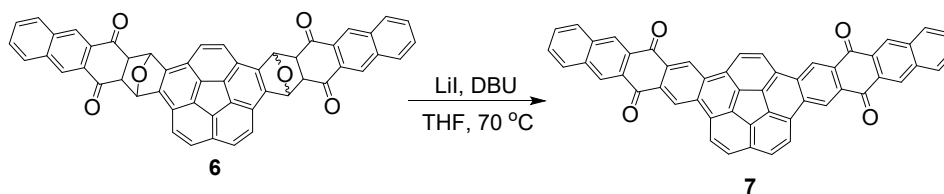

A suspension of **6** (110 mg, 0.15 mmol), DBU (0.45 mL, 3 mmol) and LiI (45 mg, 0.33 mmol) in dry THF (30 mL) was refluxed for 3 h. After cooling the reaction mixture to room temperature, the resulting yellow crude mixture was filtered and the residue washed with 100 mL THF, 50 mL  $H_2O$  and 50 mL methanol. After drying in



product was purified by column chromatography on SiO<sub>2</sub> (PE/DCM = 5/1, v/v, R<sub>f</sub> = 0.23.) to give **CORA-monPA-C<sub>60</sub>** (11 mg, 58 %) as a black solid. m.p. > 300 °C. <sup>1</sup>H NMR (400 MHz, Chloroform-*d*, 298 K) δ: δ 9.80 (s, 2H), 8.34 (d, *J* = 8.8 Hz, 2H), 7.99 (d, *J* = 8.7 Hz, 2H), 7.88–7.80 (m, 6H), 7.56 (dd, *J*<sub>1</sub> = 5.5 Hz, *J*<sub>2</sub> = 3.2 Hz, 2H), 6.68 (s, 2H), 1.33 (q, *J* = 3.2, 2.4 Hz, 42H). <sup>13</sup>C (100 MHz, CDCl<sub>3</sub>, 298 K) δ: 155.0, 154.7, 147.1, 146.3, 146.2, 146.0, 145.7, 145.4, 145.3, 145.2, 145.1, 144.5, 144.4, 142.8, 142.6, 142.4, 142.2, 141.9, 141.8, 141.5, 140.9, 140.0, 139.8, 136.9, 136.7, 135.5, 135.4, 132.9, 130.7, 129.1, 128.1, 128.0, 127.3, 126.5, 124.4, 123.7, 118.2, 103.4, 102.7, 72.0, 57.0, 29.8, 19.2, 11.7.

### 3 X-ray Crystallography

Crystals suitable for X-ray analysis were obtained by slow diffusion of acetonitrile into chloroform solution of chlorobenzene or 1,2-dichlorobenzene solutions of **CORA-monPA** and **CORA-bisPA**. The single crystal of **CORA-monPA-C<sub>60</sub>** was obtained by slow diffusion of acetonitrile into toluene/CS<sub>2</sub> solution. Single-crystal X-ray diffraction data were collected on a Super Nova, Dual, Cu at zero, Atlas S2 diffractometer. The crystal was kept at 100.00(10) K during data collection. Using Olex2<sup>S1</sup>, the structure was solved with the ShelXT<sup>S2</sup> structure solution program using Direct Methods and refined with the ShelXL<sup>S3</sup> refinement package using Least Squares minimization. The disordered solvent molecules were removed with the SQUEEZE routine in PLATON<sup>S4</sup> and the solvent-free model was employed for the final refinement. All non-hydrogen atoms were refined anisotropically. All hydrogen atoms were positioned by geometric idealization. Additional crystal and refinement information is summarized in **Table S1-3**.

Crystal Structure Data of **CORA-monPA** (CCDC number: 1976762)

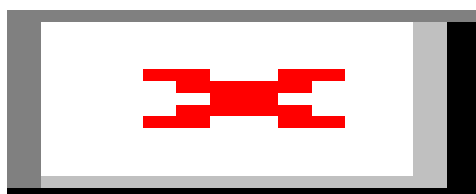

**Figure S1.** Crystal structure of **CORA-monPA** was obtained by slow diffusion of acetonitrile into chlorobenzene or 1,2-dichlorobenzene solutions. The thermal

ellipsoids are set at a 50 % probability level. Hydrogen atoms are omitted for clarity.

**Table S1.** Crystal data and structure refinement for compound **CORA-monPA**.

| Identification code                            | <b>CORA-monPA</b>                                                  |
|------------------------------------------------|--------------------------------------------------------------------|
| Empirical formula                              | $C_{116}H_{116}Si_4$                                               |
| Formula weight                                 | 1622.44                                                            |
| Temperature/K                                  | 100.00(10)                                                         |
| Crystal system                                 | monoclinic                                                         |
| Space group                                    | $P2_1$                                                             |
| a/Å                                            | 15.8079(2)                                                         |
| b/Å                                            | 17.6450(2)                                                         |
| c/Å                                            | 17.2287(3)                                                         |
| $\alpha/^\circ$                                | 90                                                                 |
| $\beta/^\circ$                                 | 107.979(2)                                                         |
| $\gamma/^\circ$                                | 90                                                                 |
| Volume/Å <sup>3</sup>                          | 4570.95(12)                                                        |
| Z                                              | 2                                                                  |
| $\rho_{\text{calc}}/\text{g}/\text{cm}^3$      | 1.179                                                              |
| $\mu/\text{mm}^{-1}$                           | 0.979                                                              |
| F(000)                                         | 1736.0                                                             |
| Crystal size/mm <sup>3</sup>                   | 0.05 × 0.05 × 0.03                                                 |
| Radiation                                      | Cu K $\alpha$ ( $\lambda = 1.54184$ )                              |
| 2 $\theta$ range for data collection/ $^\circ$ | 5.392 to 151.158                                                   |
| Index ranges                                   | $-19 \leq h \leq 19$ , $-22 \leq k \leq 21$ , $-20 \leq l \leq 21$ |
| Reflections collected                          | 31565                                                              |
| Independent reflections                        | 15965 [ $R_{\text{int}} = 0.0457$ , $R_{\text{sigma}} = 0.0402$ ]  |
| Data/restraints/parameters                     | 15965/1/1105                                                       |
| Goodness-of-fit on $F^2$                       | 0.909                                                              |
| Final R indexes [ $I \geq 2\sigma(I)$ ]        | $R_1 = 0.0486$ , $wR_2 = 0.1314$                                   |
| Final R indexes [all data]                     | $R_1 = 0.0509$ , $wR_2 = 0.1350$                                   |
| Largest diff. peak/hole / e Å <sup>-3</sup>    | 0.84/-0.41                                                         |

Crystal Structure Data of **CORA-bisPA** (CCDC number: 2172312)

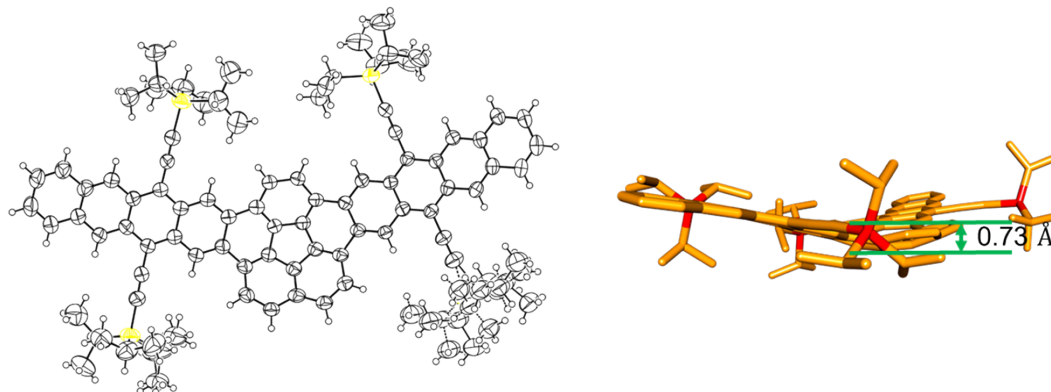

**Figure S2.** Crystal structure of **CORA-bisPA** was obtained by slow diffusion of acetonitrile into chlorbenzene or 1,2-dichlorobenzene solutions. The thermal



ellipsoids are set at a 50% probability level. Hydrogen atoms are omitted for clarity.

**Table S2.** Crystal data and structure refinement for compound **CORA-bisPA**.

| Identification code                         | <b>CORA-bisPA</b>                                              |
|---------------------------------------------|----------------------------------------------------------------|
| Empirical formula                           | C <sub>96</sub> H <sub>106</sub> Si <sub>4</sub>               |
| Formula weight                              | 1372.16                                                        |
| Temperature/K                               | 100.01(10)                                                     |
| Crystal system                              | monoclinic                                                     |
| Space group                                 | P2 <sub>1</sub> /n                                             |
| a/Å                                         | 8.74760(10)                                                    |
| b/Å                                         | 16.0057(3)                                                     |
| c/Å                                         | 57.0011(11)                                                    |
| α/°                                         | 90                                                             |
| β/°                                         | 92.5220(10)                                                    |
| γ/°                                         | 90                                                             |
| Volume/Å <sup>3</sup>                       | 7973.1(2)                                                      |
| Z                                           | 4                                                              |
| ρ <sub>calc</sub> /g/cm <sup>3</sup>        | 1.143                                                          |
| μ/mm <sup>-1</sup>                          | 1.032                                                          |
| F(000)                                      | 2952.0                                                         |
| Crystal size/mm <sup>3</sup>                | 0.35 × 0.31 × 0.2                                              |
| Radiation                                   | CuKα (λ = 1.54184)                                             |
| 2θ range for data collection/°              | 7.224 to 134.158                                               |
| Index ranges                                | -8 ≤ h ≤ 10, -19 ≤ k ≤ 19, -68 ≤ l ≤ 65                        |
| Reflections collected                       | 51982                                                          |
| Independent reflections                     | 14177 [R <sub>int</sub> = 0.0425, R <sub>sigma</sub> = 0.0340] |
| Data/restraints/parameters                  | 14177/368/1030                                                 |
| Goodness-of-fit on F <sup>2</sup>           | 1.943                                                          |
| Final R indexes [I ≥ 2σ (I)]                | R <sub>1</sub> = 0.1390, wR <sub>2</sub> = 0.4377              |
| Final R indexes [all data]                  | R <sub>1</sub> = 0.1536, wR <sub>2</sub> = 0.4519              |
| Largest diff. peak/hole / e Å <sup>-3</sup> | 1.31/-0.69                                                     |

Crystal Structure Data of **CORA-monPA-C<sub>60</sub>** (CCDC number: 2172313)

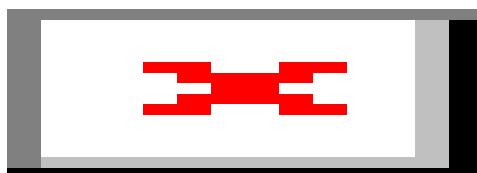

**Figure S3.** Crystal structure of **CORA-monPA-C<sub>60</sub>** was obtained by slow diffusion of acetonitrile into toluene/CS<sub>2</sub> solution. The thermal ellipsoids are set at a 50% probability level. Hydrogen atoms are omitted for clarity.

**Table S3.** Crystal data and structure refinement for compound **CORA-monPA-C<sub>60</sub>**.

| Identification code                         | <b>CORA-monPA-C<sub>60</sub></b>                               |
|---------------------------------------------|----------------------------------------------------------------|
| Empirical formula                           | C <sub>236</sub> H <sub>116</sub> Si <sub>4</sub>              |
| Formula weight                              | 3063.64                                                        |
| Temperature/K                               | 100.01(10)                                                     |
| Crystal system                              | triclinic                                                      |
| Space group                                 | P-1                                                            |
| a/Å                                         | 15.8622(3)                                                     |
| b/Å                                         | 16.2342(4)                                                     |
| c/Å                                         | 32.4713(5)                                                     |
| α/°                                         | 101.559(2)                                                     |
| β/°                                         | 91.737(2)                                                      |
| γ/°                                         | 118.326(2)                                                     |
| Volume/Å <sup>3</sup>                       | 7134.6(3)                                                      |
| Z                                           | 2                                                              |
| ρ <sub>calc</sub> /g/cm <sup>3</sup>        | 1.426                                                          |
| μ/mm <sup>-1</sup>                          | 0.930                                                          |
| F(000)                                      | 3176.0                                                         |
| Crystal size/mm <sup>3</sup>                | 0.3 × 0.2 × 0.2                                                |
| Radiation                                   | CuKα (λ = 1.54184)                                             |
| 2θ range for data collection/°              | 7.28 to 144.448                                                |
| Index ranges                                | -17 ≤ h ≤ 19, -20 ≤ k ≤ 18, -32 ≤ l ≤ 39                       |
| Reflections collected                       | 53863                                                          |
| Independent reflections                     | 27273 [R <sub>int</sub> = 0.0341, R <sub>sigma</sub> = 0.0454] |
| Data/restraints/parameters                  | 27273/0/2161                                                   |
| Goodness-of-fit on F <sup>2</sup>           | 1.025                                                          |
| Final R indexes [I ≥ 2σ (I)]                | R <sub>1</sub> = 0.0986, wR <sub>2</sub> = 0.2744              |
| Final R indexes [all data]                  | R <sub>1</sub> = 0.1204, wR <sub>2</sub> = 0.2983              |
| Largest diff. peak/hole / e Å <sup>-3</sup> | 1.87/-1.12                                                     |

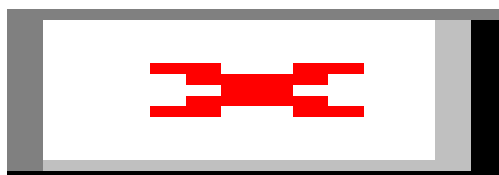**Figure S4.** Crystal packing of **CORA-monPA** from top (a) and side (b) view, hydrogen atoms are omitted for clarity.

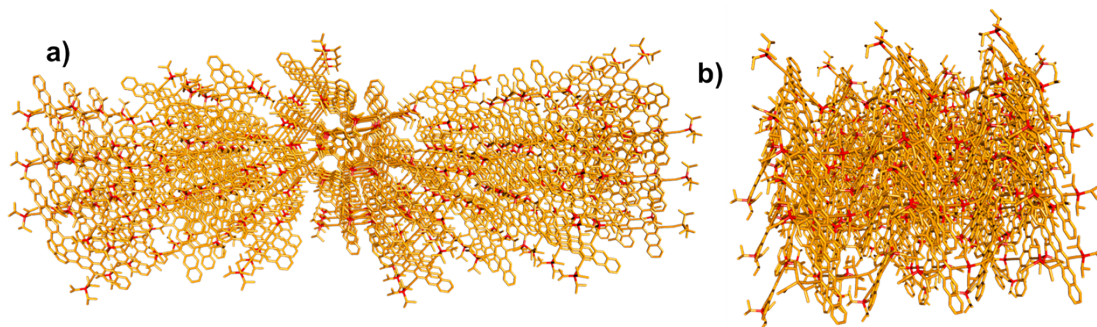

**Figure S5.** Crystal packing of **CORA-bisPA** from top (a) and side (b) view, hydrogen atoms are omitted for clarity.

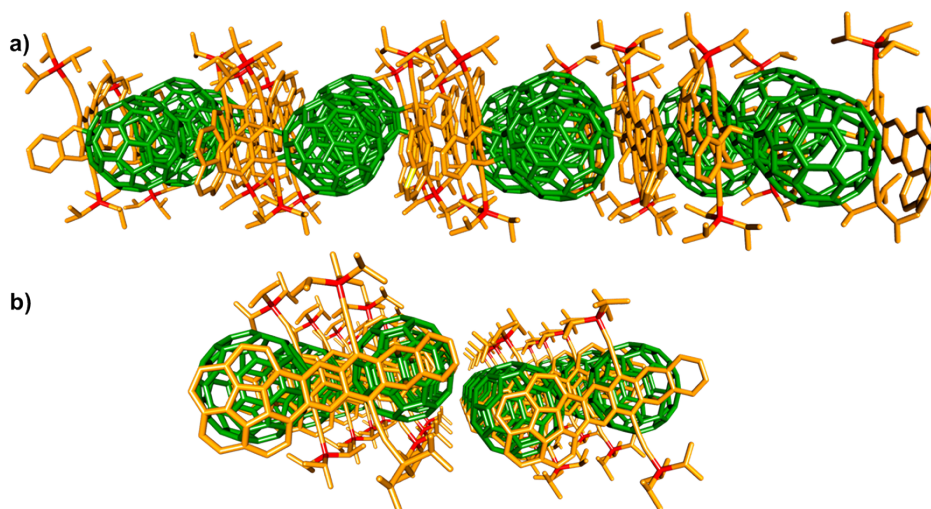

**Figure S6.** Crystal packing of **CORA-monPA-C<sub>60</sub>** from top view, hydrogen atoms are omitted for clarity.

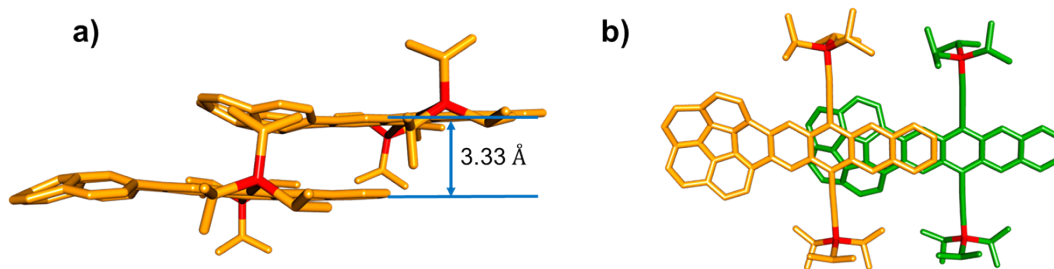

**Figure S7.** The distances of **CORA-monPA** in the solid phase. Hydrogen atoms are omitted for clarity.

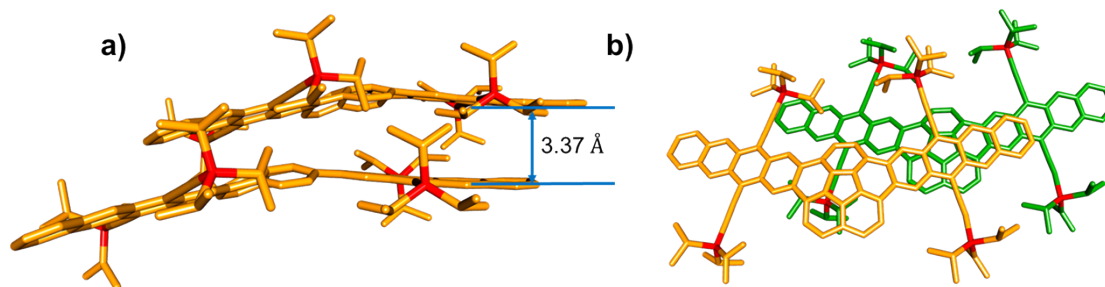

**Figure S8.** The distances of **CORA-bisPA** in the solid phase. Hydrogen atoms are

omitted for clarity.

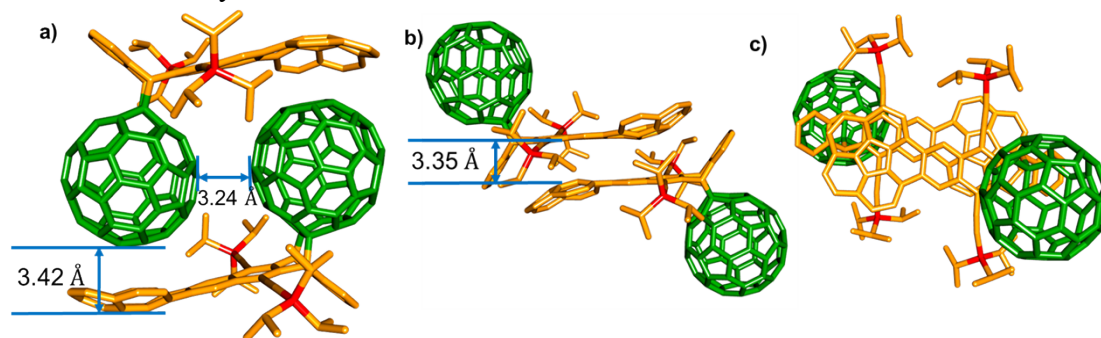

**Figure S9.** The distances of **CORA-monPA-C<sub>60</sub>** in the solid phase. Hydrogen atoms are omitted for clarity. Furthermore, the crystal packings reveal that the surface-to-surface distance between corannulene unit and C<sub>60</sub> and the C<sub>60</sub>-C<sub>60</sub> in the dimer formed by the adduct CORA-monPA-C<sub>60</sub>, as shown in Figure S9, are close to the distance of aromatic  $\pi$ - $\pi$  stacks, suggesting that the intermolecular repulsion of CORA-monPA-C<sub>60</sub> is smaller than that of CORA-monPA-C<sub>60</sub>-3 and consequently leading to the formation of the stable adduct of CORA-monPA-C<sub>60</sub>.

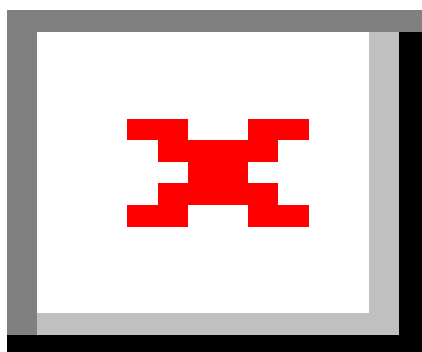

**Figure S10.** Bond lengths for **CORA-monPA** are listed, *t*-Bu groups and hydrogen atoms are omitted for clarity.

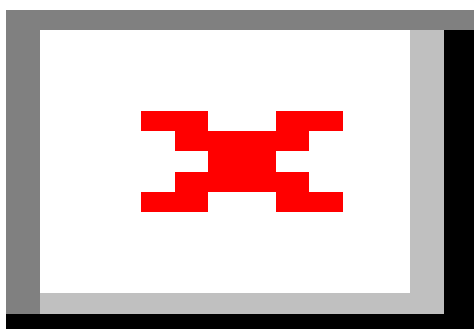

**Figure S11.** Bond lengths for **CORA-bisPA** are listed, *t*-Bu groups and hydrogen atoms are omitted for clarity.

#### 4 Photophysical Study

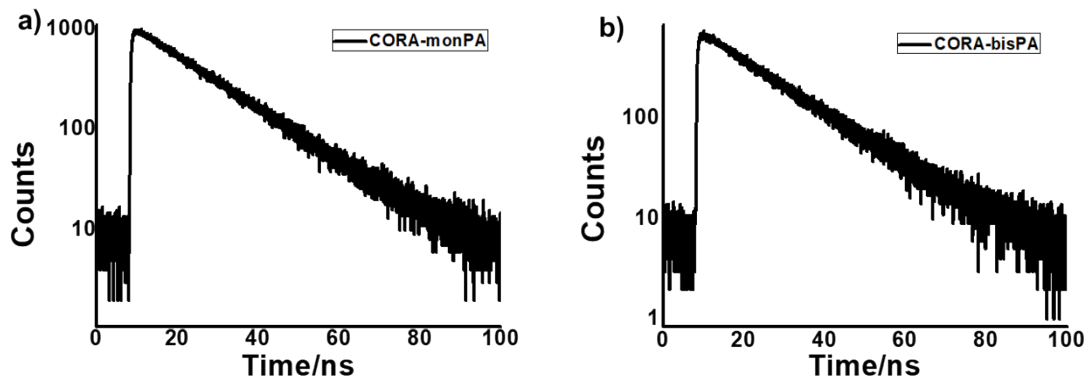

**Figure S12.** Fluorescence lifetimes measured at 603 nm, 607 nm for **CORA-monPA** and **CORA-bisPA** in  $\text{CHCl}_3$ , respectively.

**Table S4.** Absorption and emission data for bis(TIPS-ethynyl)-substituted tetracene (**TIPS-Tc**) and bis(TIPS-ethynyl)-substituted pentacene (**TIPS-Pc**).

| Compounds      | $\lambda_{\text{abs}}[\text{nm}]$ <sup>S5</sup> | $\lambda_{\text{em}}[\text{nm}]$ <sup>S5</sup> | $\Phi_{\text{F}}$ <sup>S5</sup> |
|----------------|-------------------------------------------------|------------------------------------------------|---------------------------------|
| <b>TIPS-Tc</b> | 534                                             | 546                                            | 64 %                            |
| <b>TIPS-Pc</b> | 643                                             | 652                                            | 21 %                            |

## 5 CV and DPV Experiments

CV and DPV experiments were carried out with an electrochemical workstation from Chenhua Instruments Co. (Shanghai, China), employing a glass carbon electrode with 4 mm in diameter as the working electrode, a platinum wire as counter electrode and an Ag/AgCl electrode as reference electrode. 0.1 M of tetrabutylammonium perchlorate (TBAP) in DCM was used as electrolyte.

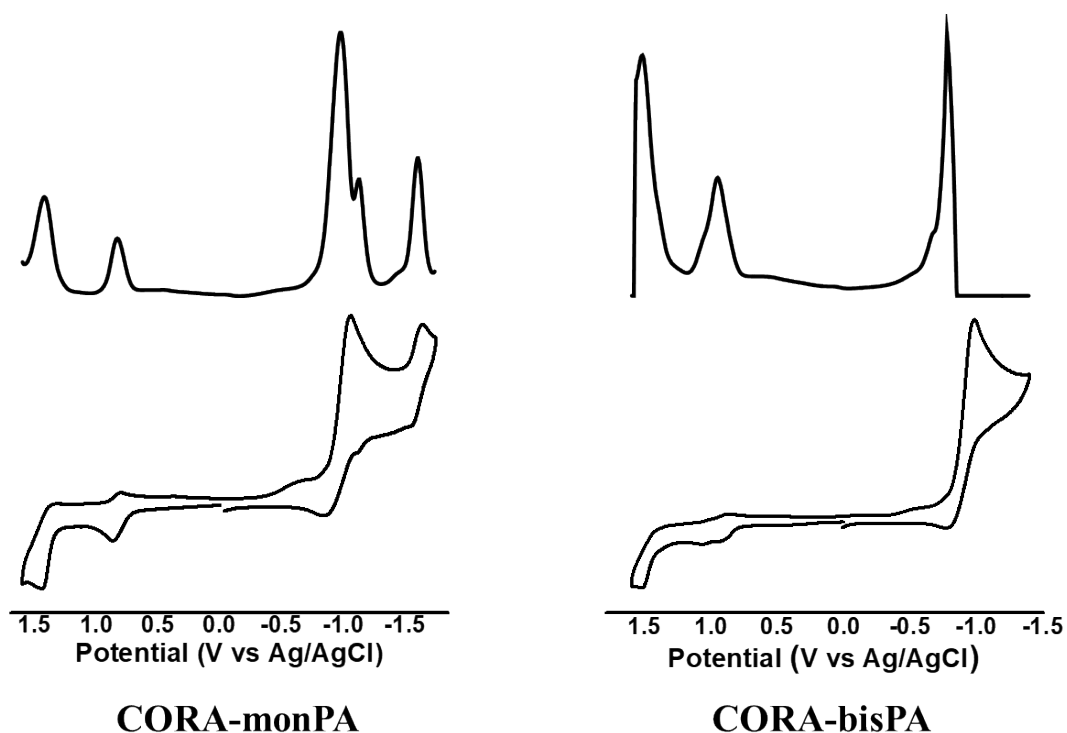

**Figure S13.** DPV (Top) and CV (Bottom) experiments of **CORA-monPA** (a) and **CORA-bisPA** (b) at 298 K.

## 6 Diels-Alder reactions between CORA-monPA/bisPA and C<sub>60</sub>

Using the second-order rate law,  $1/c_{\text{CORA-monPA}} = kt + 1/c_0$ , the association rate constant ( $k$ ) was determined at the early stage of the Diels-Alder reaction from the slope of the straight line in the plot of  $1/[c_{\text{CORA-monPA}}]$  against  $t$  (hours or mins) at  $T$  K,  $k = \text{slope}$ , the half-life of the Diels-Alder reaction was given by  $t_{1/2} = 1/(kc_0)$ .  $[c_{\text{CORA-monPA}}]$  was determined based on  $[c_0] - [c_{\text{CORA-monPA-C}_{60}}]$ , where  $[c_{\text{CORA-monPA-C}_{60}}]$  is the concentration of the adduct from over a period of time determined from the integration of characteristics signal.

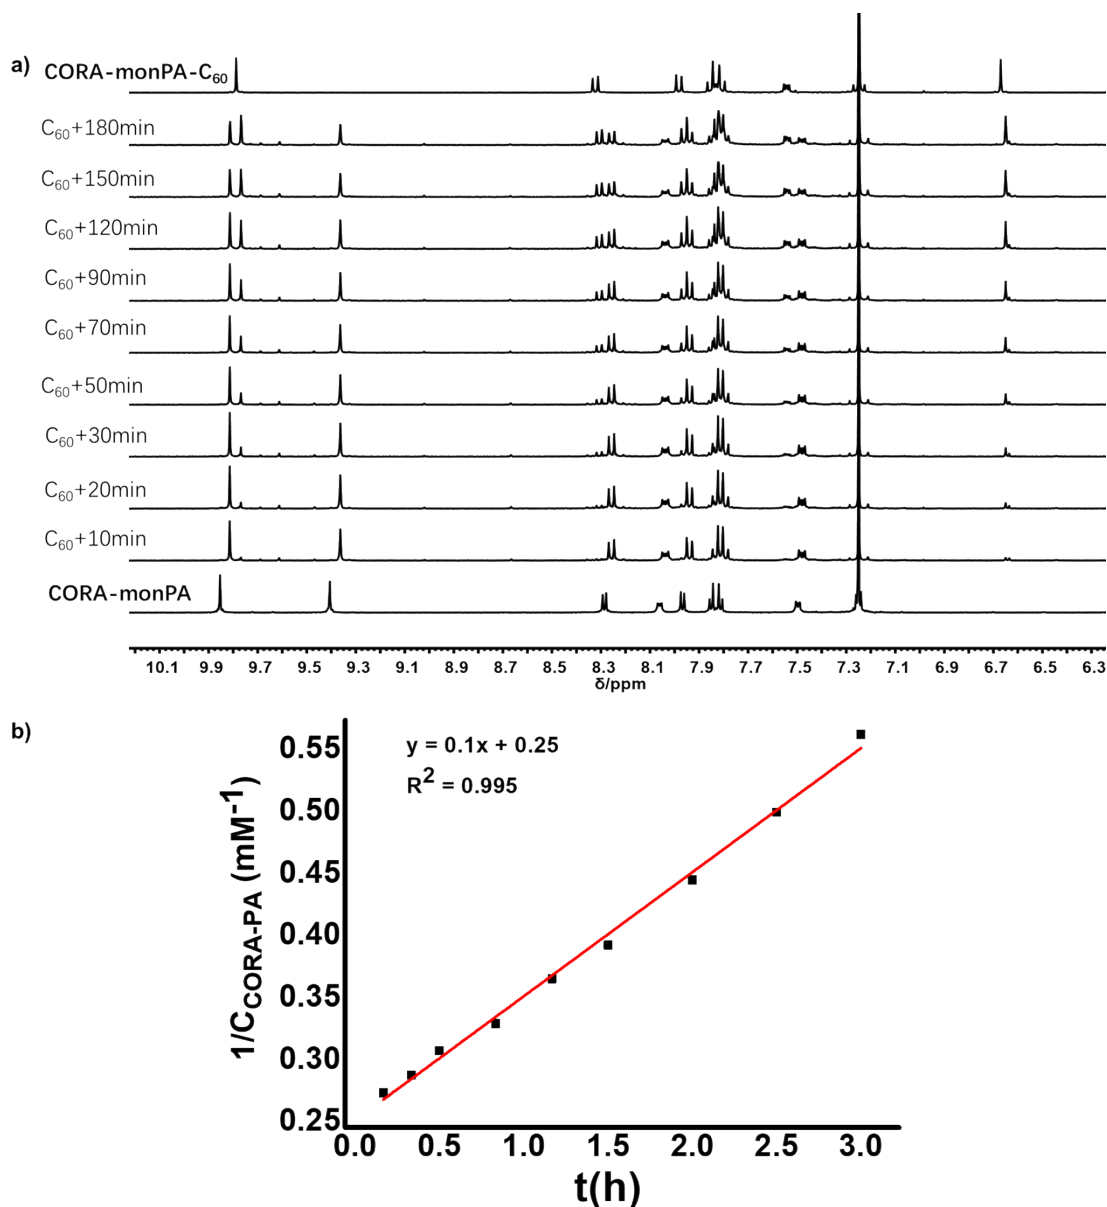

**Figure S14.** (a) Partial <sup>1</sup>H NMR (400 MHz, 298 K) spectra at various time intervals of **CORA-monPA** (4.0 mM, CDCl<sub>3</sub>, C<sub>0</sub> = 4.0 mM) mixed with 1.0 equiv C<sub>60</sub> at 298 K. (b) The linear plot of 1/c<sub>CORA-monPA</sub> VS t at 298 K. The [c<sub>CORA-monPA</sub>] and [c<sub>CORA-monPA-C<sub>60</sub></sub>] of the reaction of **CORA-monPA** added equimolar C<sub>60</sub> with time at 298 K. [c<sub>CORA-monPA</sub>] and [c<sub>CORA-monPA-C<sub>60</sub></sub>] were determined based on the integration values of the signals at δ 9.81 ppm and 9.76 ppm, respectively.  $k(\mathbf{c}_{\text{CORA-monPA-C}_{60}}) = \text{slope} = 0.1 \text{ mM}^{-1}\text{h}^{-1} = 0.028 \text{ M}^{-1}\text{S}^{-1}$ ,  $t_{1/2}(\mathbf{c}_{\text{CORA-monPA-C}_{60}}) = 2.5 \text{ h}$ .

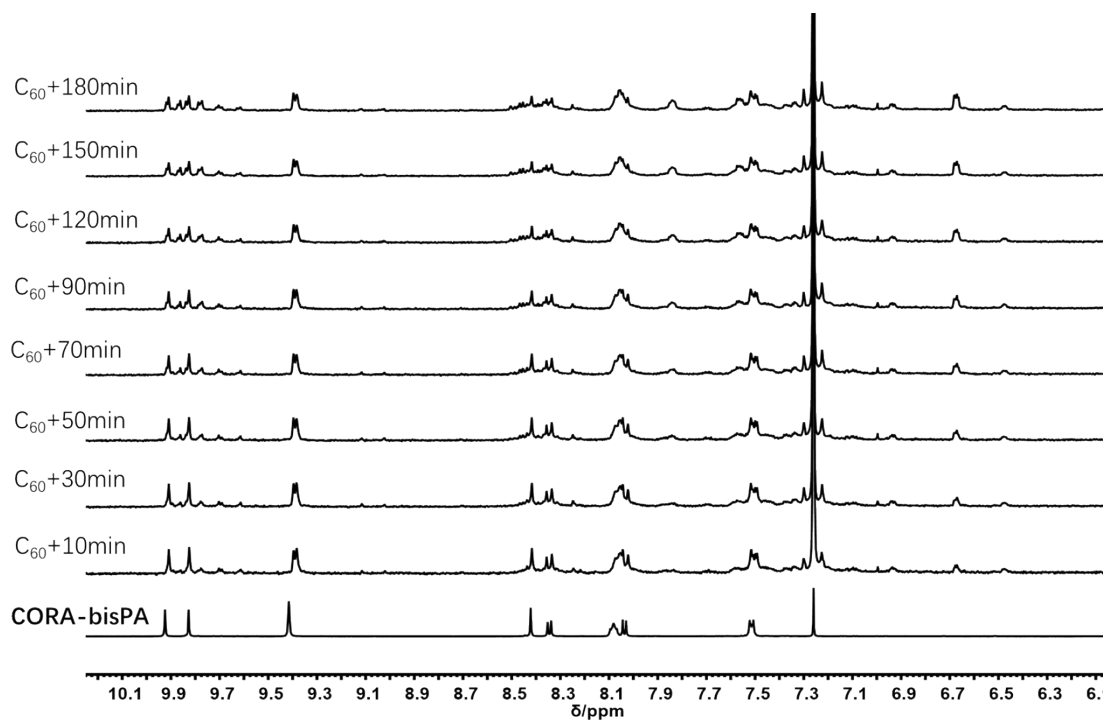

**Figure S15.** Partial  $^1\text{H}$  NMR (400 MHz, 298 K) spectra at various time intervals of **CORA-bisPA** (4.0 mM,  $\text{CDCl}_3$ ) mixed with 2.0 equiv  $\text{C}_{60}$  at 298 K.

## 7 Computational Method

All calculations were performed using the Gaussian 09<sup>S6</sup> program package. The geometries of molecule **CORA-monPA/bisPA** were first optimized at the B3LYP level of density functional theory (DFT) with the 6-31G(d) basis set and polarizable continuum solvation model (PCM). All structures are ground-state minima according to the analysis of their harmonic vibrational analytical frequencies computed at the same level, which show no imaginary frequencies. The first sixty vertical transition energies for **CORA-monPA/bisPA** were calculated by time-dependent density functional theory (TD-DFT) at the B3LYP/6-31G(d)/PCM level. All bright states (oscillator strength  $f > 0.1$ ) and corresponding main single electron transition are listed in Table S4-5. UV-vis spectra of **CORA-monPA/bisPA** were simulated according to TD-DFT results. Nucleus independent chemical shifts (NICS) calculations of **CORA-monPA/bisPA** are at the GIAO-B3LYP/6-311+G(2d,p)/PCM level and were all carried out according to published procedures.<sup>S7</sup> The ACID plots were generated with Gaussian 09 using the CSGT method and ACID 2.0.0.<sup>S8</sup> The geometries involved in the DA reaction of  $\text{C}_{60}$  with **CORA-monPA** were optimized at the M06-2X level of density functional theory (DFT) with the 6-31G(d) basis set



and polarizable continuum solvation model (PCM).<sup>S9</sup> Harmonic vibration frequency calculations at the same level were performed to verify all stationary points as local minima (with no imaginary frequency) or transition states (with one imaginary frequency) and to evaluate zero-point energy and Gibbs free energy at 298 K and 1 atm. Transition states were also verified by IRC calculations.

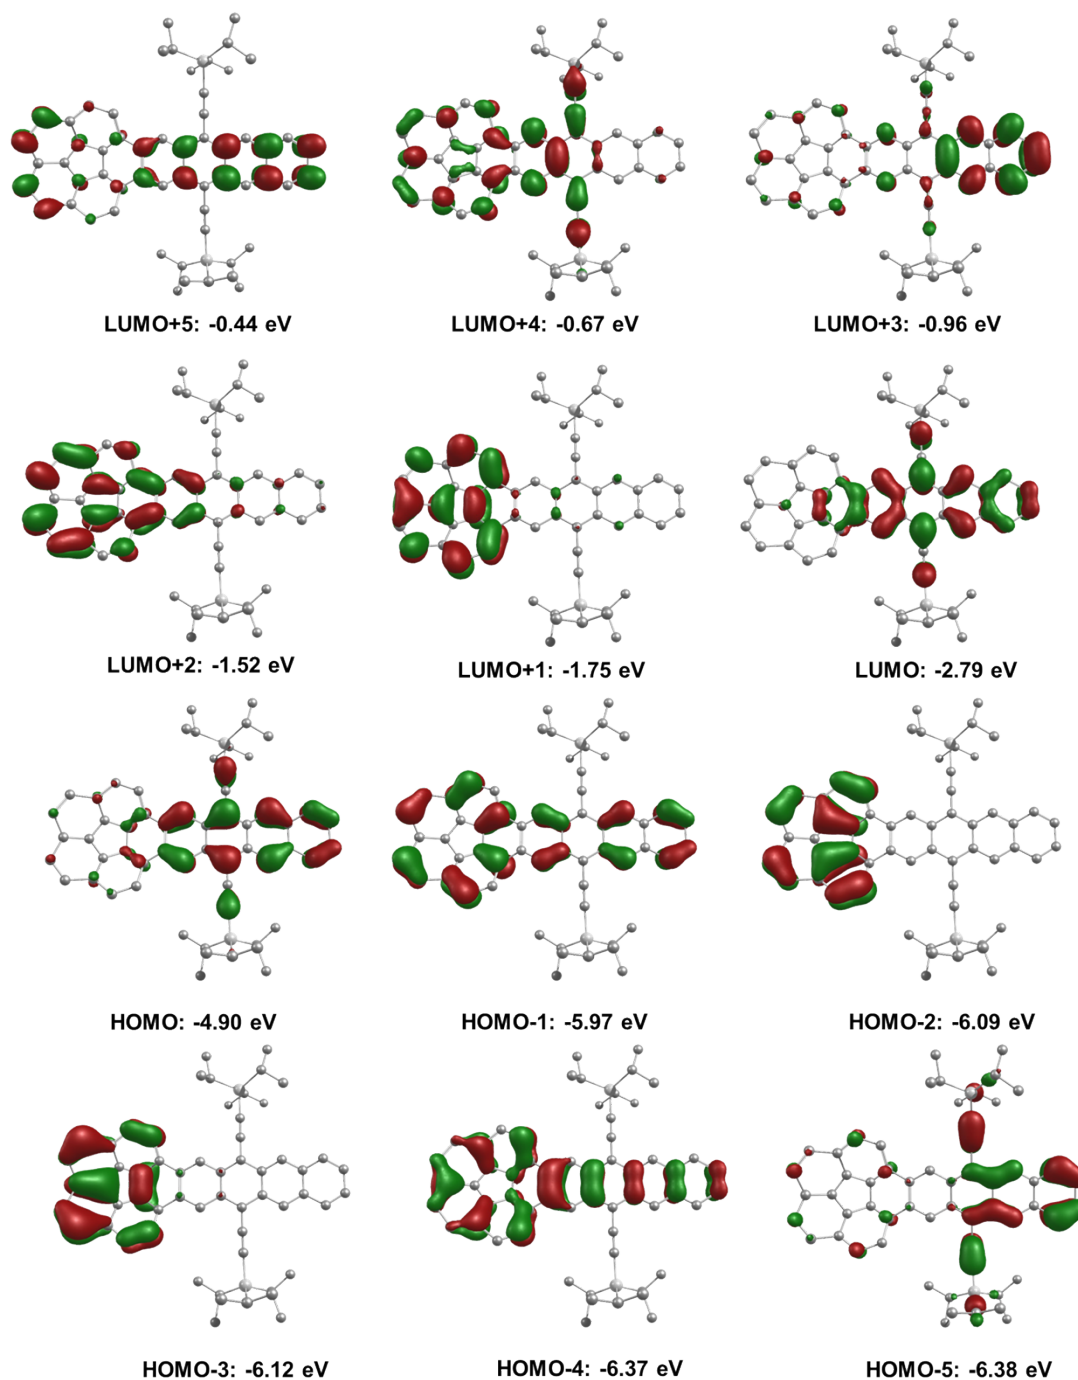

**Figure S16.** Kohn-Sham frontier orbitals and frontier orbital energies for **CORA-monPA** at the optimized S<sub>0</sub> geometry at B3LYP/6-31G(d) level of theory in chloroform solution.

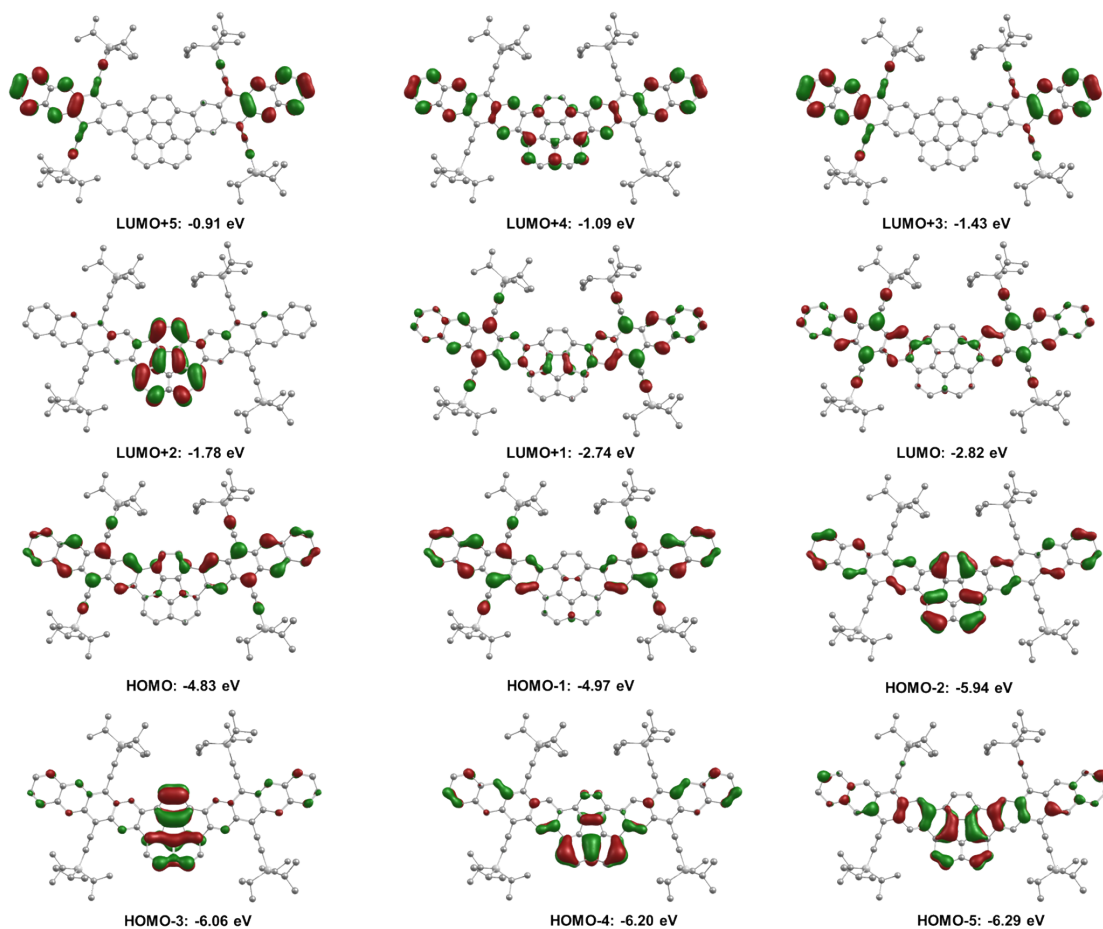

**Figure S17.** Kohn-Sham frontier orbitals and frontier orbital energies for **CORA-bisPA** at the optimized  $S_0$  geometry at B3LYP/6-31G(d) level of theory in chloroform solution.

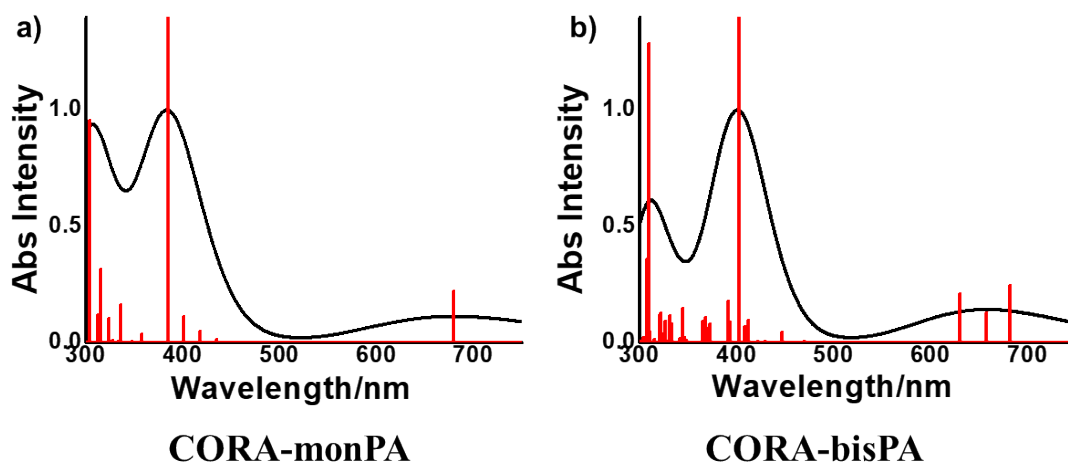

**Figure S18.** Simulated UV-vis spectra of **CORA-monPA** (a) and **CORA-bisPA** (b) at the B3LYP/6-31G(d)/PCM level of theory.

**Table S5.** TD-DFT singlet excitation energies  $E$ , excitation wavelengths  $\lambda$ , oscillator strengths  $f > 0.1$ , and orbital contributions for **CORA-monPA** at the optimized  $S_0$

ground state geometry in chloroform.

| Energy (eV) | Wavelength (nm) | Osc. Strength | Major contributions                                                            |
|-------------|-----------------|---------------|--------------------------------------------------------------------------------|
| 1.83        | 679             | 0.2213        | H→L (100%)                                                                     |
| 3.09        | 401             | 0.1110        | H-5→L (90%)                                                                    |
| 3.22        | 385             | 1.7884        | H-4→L (62%)<br>H→L+2 (33%)                                                     |
| 3.69        | 336             | 0.1648        | H-3→L+2 (20%)<br>H-1→L+1 (37%)<br>H→L+4 (33%)                                  |
| 3.94        | 315             | 0.3162        | H-10→L (28%)<br>H-1→L+2 (22%)<br>H→L+5 (29%)                                   |
| 3.96        | 313             | 0.1208        | H-3→L+2 (64%)<br>H-1→L+1 (22%)                                                 |
| 4.07        | 304             | 0.9566        | H-10→L (22%)<br>H-4→L+1 (18%)<br>H-2→L+2 (12%)<br>H-1→L+2 (15%)<br>H→L+5 (22%) |
| 4.16        | 298             | 0.1225        | H-4→L+1 (17%)<br>H-3→L+1 (14%)<br>H-2→L+2 (53%)                                |
| 4.38        | 283             | 0.1556        | H-5→L+1 (14%)<br>H-4→L+2 (62%)                                                 |
| 4.95        | 251             | 0.2186        | H-5→L+3 (75%)                                                                  |
| 4.98        | 249             | 0.1106        | H-2→L+3 (16%)<br>H-2→L+4 (60%)                                                 |

**Table S6.** TD-DFT singlet excitation energies  $E$ , excitation wavelengths  $\lambda$ , oscillator strengths  $f > 0.1$ , and orbital contributions for **CORA-bisPA** at the optimized S0 ground state geometry in chloroform.

| Energy (eV) | Wavelength (nm) | Osc. Strength | Major contributions                         |
|-------------|-----------------|---------------|---------------------------------------------|
| 1.82        | 681             | 0.2464        | H→L+1 (98%)                                 |
| 1.89        | 657             | 0.1301        | H-1→L (98%)                                 |
| 1.97        | 630             | 0.2122        | H-1→L+1 (99%)                               |
| 3.08        | 402             | 3.4074        | H-5→L (44%)<br>H-4→L+1 (11%)<br>H→L+3 (37%) |
| 3.17        | 391             | 0.1782        | H-7→L+1 (25%)<br>H-6→L (38%)<br>H-4→L (11%) |
| 3.37        | 368             | 0.1102        | H-7→L (27%)                                 |

|      |     |        |                                                                                   |
|------|-----|--------|-----------------------------------------------------------------------------------|
| 3.60 | 345 | 0.1466 | H-6→L+1 (51%)<br>H-1→L+4 (11%)<br>H-1→L+5 (14%)<br>H→L+5 (26%)<br>H→L+6 (24%)     |
| 3.60 | 344 | 0.1431 | H-1→L+4 (10%)<br>H-1→L+5 (14%)<br>H→L+5 (24%)<br>H→L+6 (31%)                      |
| 3.74 | 331 | 0.1158 | H-2→L+2 (81%)                                                                     |
| 3.86 | 321 | 0.1272 | H-1→L+6 (53%)<br>H→L+5 (12%)                                                      |
| 3.86 | 321 | 0.1195 | H-4→L+2 (30%)<br>H-3→L+2 (12%)<br>H-2→L+3 (11%)<br>H-1→L+6 (14%)                  |
| 4.01 | 310 | 1.2887 | H-2→L+3 (36%)<br>H-1→L+7 (40%)                                                    |
| 4.03 | 307 | 0.3601 | H-15→L+1 (20%)<br>H→L+7 (55%)                                                     |
| 4.20 | 295 | 0.1706 | H-17→L (11%)<br>H-16→L+1 (11%)<br>H-6→L+2 (11%)<br>H-5→L+3 (10%)<br>H-1→L+7 (24%) |

**Table S7.** Uncorrected and thermal-corrected (298 K) energies of stationary points (Hartree)<sup>a</sup>

| optimized structure                | imaginary frequencies | E(H)          | E+ZPE(H)    | G(H)        |
|------------------------------------|-----------------------|---------------|-------------|-------------|
| C <sub>60</sub>                    | 0                     | -             | -           | -           |
|                                    |                       | 2285.45657206 | 2285.075284 | 2285.118236 |
| <b>CORA-monPA</b>                  | 0                     | -             | -           | -           |
|                                    |                       | 2823.08273276 | 2822.086046 | 2822.183005 |
| <b>TS1</b>                         | 1                     | -             | -           | -           |
|                                    |                       | 5108.53832256 | 5107.158129 | 5107.267146 |
| <b>CORA-monPA-C<sub>60</sub></b>   | 0                     | -             | -           | -           |
|                                    |                       | 5108.59424510 | 5107.210099 | 5107.319379 |
| <b>TS2</b>                         | 1                     | -             | -           | -           |
|                                    |                       | 5108.54321690 | 5107.164384 | 5107.274929 |
| <b>CORA-monPA-C<sub>60</sub>-3</b> | 0                     | -             | -           | -           |
|                                    |                       | 5108.58161974 | 5107.199995 | 5107.309726 |

a) *E*: electronic energy; *ZPE*: zero-point energy; *G*: sum of electronic and thermal free energies.

**Table S8.** NICS(1)<sub>ZZ</sub> and NICS(-1)<sub>ZZ</sub> for **CORA-monPA** at the optimized S0 geometry at B3LYP/6-311+G(2d,p) level of theory in chloroform solution. The position 1 Å above the ring center is defined as “1” and the position 1 Å under the ring center is defined as “-1”.

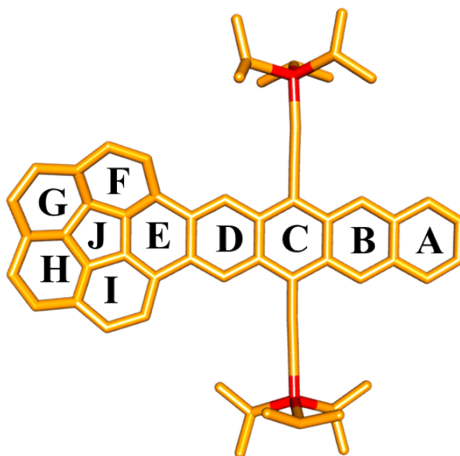

|   | NICS(1) <sub>ZZ</sub> | NICS(-1) <sub>ZZ</sub> | Average value |
|---|-----------------------|------------------------|---------------|
| A | -22.4                 | -22.6                  | -22.5         |
| B | -32.7                 | -32.6                  | -32.6         |
| C | -26.1                 | -26.0                  | -26.0         |
| D | -21.5                 | -21.6                  | -21.6         |
| E | -2.7                  | 2.3                    | -0.2          |
| F | -22.4                 | -14.8                  | -18.6         |
| G | -21.0                 | -14.8                  | -17.9         |
| H | -24.1                 | -15.1                  | -19.6         |
| I | -24.5                 | -14.3                  | -19.4         |
| J | 12.4                  | 12.1                   | 12.3          |

**Table S9.** NICS(1)<sub>ZZ</sub> and NICS(-1)<sub>ZZ</sub> for **CORA-bisPA** at the optimized S0 geometry at B3LYP/6-311+G(2d,p) level of theory in chloroform solution. The position 1 Å above the ring center is defined as “1” and the position 1 Å under the ring center is defined as “-1”.

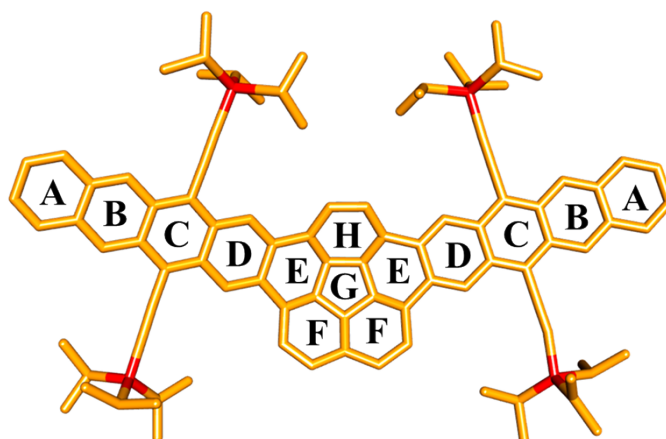

|   | NICS(1) <sub>ZZ</sub> | NICS(-1) <sub>ZZ</sub> | Average value |
|---|-----------------------|------------------------|---------------|
| A | -22.4                 | -21.8                  | -22.1         |
| B | -32.3                 | -31.7                  | -32.2         |
| C | -25.8                 | -25.7                  | -25.8         |
| D | -20.9                 | -22.0                  | -21.5         |
| E | -0.1                  | 5.1                    | 2.5           |
| F | -21.0                 | -13.5                  | -17.2         |
| G | 12.6                  | 10.2                   | 11.4          |
| H | -13.3                 | -17.0                  | -15.1         |

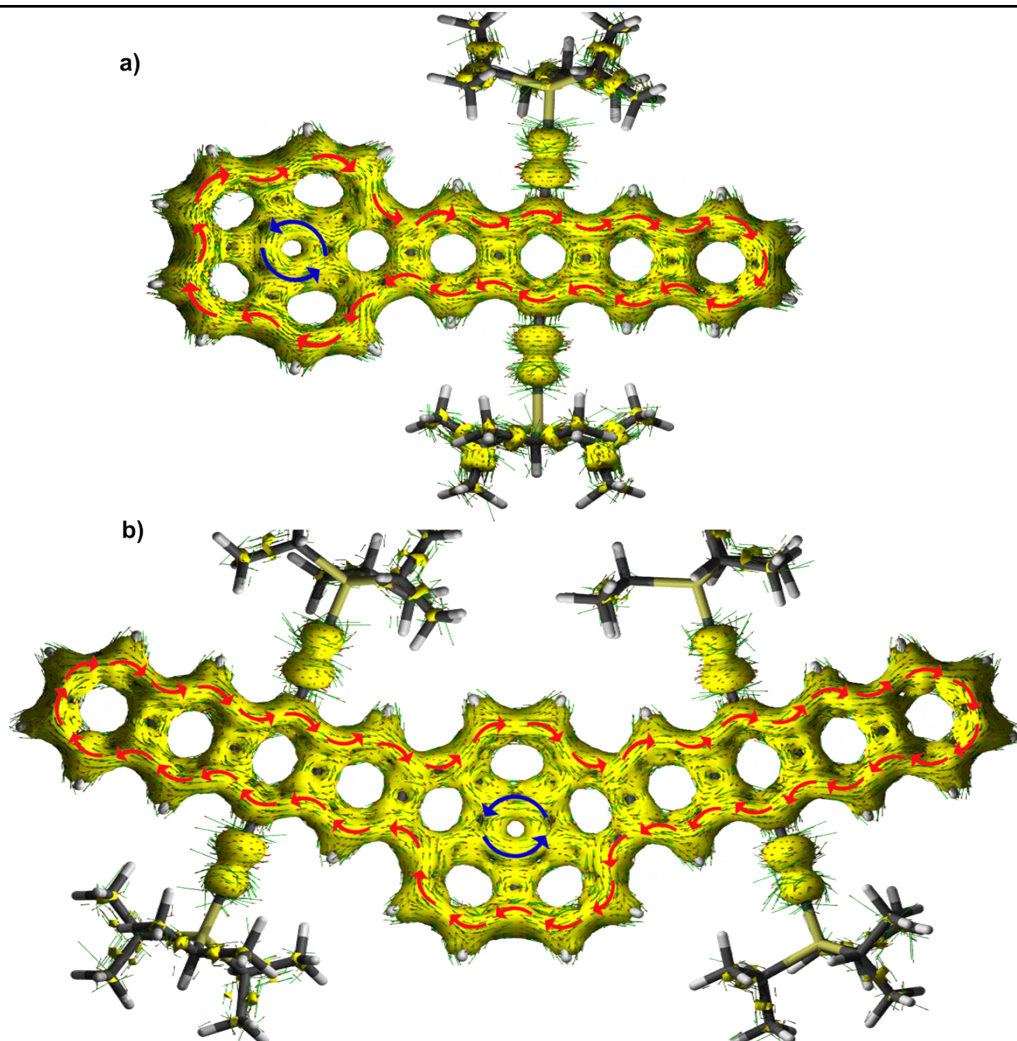

**Figure S19.** ACID plots of **CORA-monPA** (a) and **CORA-bisPA** (b) (Iso value: 0.05 a.u.). The direction of external magnetic vector is orthogonal with respect to the central ring plane and points upward.

**Table S10.** Cartesian coordinates of optimized species.

Optimized S0 geometry of **CORA-monPA** (at the B3LYP/6-31G(d)/PCM level)

| Center Number | Atomic Number | Atomic Type | Coordinates (Angstroms) |   |   |
|---------------|---------------|-------------|-------------------------|---|---|
|               |               |             | X                       | Y | Z |
| -----         |               |             |                         |   |   |

|    |    |   |           |           |           |
|----|----|---|-----------|-----------|-----------|
| 1  | 14 | 0 | 9.177416  | 3.025107  | 6.379628  |
| 2  | 14 | 0 | 10.403508 | 14.637295 | 8.445127  |
| 3  | 6  | 0 | 10.774180 | 9.571226  | 6.753837  |
| 4  | 6  | 0 | 9.935769  | 10.225932 | 7.709995  |
| 5  | 6  | 0 | 11.454255 | 7.525127  | 5.574287  |
| 6  | 1  | 0 | 11.339490 | 6.460089  | 5.400873  |
| 7  | 6  | 0 | 10.092183 | 11.619046 | 7.946285  |
| 8  | 6  | 0 | 7.141761  | 9.438851  | 10.090373 |
| 9  | 6  | 0 | 6.981643  | 7.981779  | 9.852266  |
| 10 | 6  | 0 | 7.802828  | 7.377086  | 8.924984  |
| 11 | 1  | 0 | 7.696416  | 6.313983  | 8.737339  |
| 12 | 6  | 0 | 12.429436 | 8.227083  | 4.867539  |
| 13 | 6  | 0 | 9.308152  | 4.838767  | 6.726702  |
| 14 | 6  | 0 | 4.549076  | 9.705754  | 12.750300 |
| 15 | 6  | 0 | 9.611986  | 7.420143  | 7.229829  |
| 16 | 6  | 0 | 4.305371  | 7.452699  | 12.388510 |
| 17 | 6  | 0 | 8.794641  | 8.076756  | 8.183242  |
| 18 | 6  | 0 | 5.251362  | 9.381975  | 11.570899 |
| 19 | 6  | 0 | 10.232390 | 12.818747 | 8.149400  |
| 20 | 6  | 0 | 12.585278 | 9.646825  | 5.102593  |
| 21 | 6  | 0 | 5.098573  | 7.971277  | 11.344013 |
| 22 | 6  | 0 | 8.955989  | 9.491157  | 8.422475  |
| 23 | 6  | 0 | 9.478642  | 15.536508 | 7.027741  |
| 24 | 1  | 0 | 9.635604  | 16.611958 | 7.204231  |
| 25 | 6  | 0 | 10.612789 | 8.151387  | 6.513429  |
| 26 | 6  | 0 | 13.589210 | 10.359223 | 4.368457  |
| 27 | 1  | 0 | 13.703996 | 11.425383 | 4.547384  |
| 28 | 6  | 0 | 11.758957 | 10.274025 | 6.033318  |
| 29 | 1  | 0 | 11.874458 | 11.338595 | 6.211571  |
| 30 | 6  | 0 | 4.854896  | 10.798924 | 13.549517 |
| 31 | 6  | 0 | 8.108537  | 10.114975 | 9.378767  |
| 32 | 1  | 0 | 8.234845  | 11.180518 | 9.538376  |
| 33 | 6  | 0 | 13.286747 | 7.590510  | 3.911636  |
| 34 | 1  | 0 | 13.167365 | 6.524135  | 3.737513  |
| 35 | 6  | 0 | 9.442826  | 6.031491  | 6.972618  |

|    |   |   |           |           |           |
|----|---|---|-----------|-----------|-----------|
| 36 | 6 | 0 | 3.966407  | 8.518758  | 13.256523 |
| 37 | 6 | 0 | 4.348427  | 6.127296  | 12.798968 |
| 38 | 6 | 0 | 6.305287  | 10.127028 | 11.098516 |
| 39 | 6 | 0 | 10.410823 | 2.135436  | 7.547677  |
| 40 | 1 | 0 | 10.337798 | 1.066352  | 7.294095  |
| 41 | 6 | 0 | 5.920012  | 5.794367  | 10.911169 |
| 42 | 1 | 0 | 6.560023  | 5.103527  | 10.369492 |
| 43 | 6 | 0 | 5.134867  | 5.277376  | 11.942866 |
| 44 | 1 | 0 | 5.197701  | 4.211970  | 12.151458 |
| 45 | 6 | 0 | 12.272837 | 15.080038 | 8.510227  |
| 46 | 1 | 0 | 12.571623 | 14.867795 | 9.548237  |
| 47 | 6 | 0 | 5.987305  | 7.205944  | 10.627063 |
| 48 | 6 | 0 | 12.535667 | 16.578895 | 8.254963  |
| 49 | 1 | 0 | 12.279650 | 16.863548 | 7.227169  |
| 50 | 1 | 0 | 13.598940 | 16.813238 | 8.400176  |
| 51 | 1 | 0 | 11.963485 | 17.227037 | 8.928086  |
| 52 | 6 | 0 | 5.831571  | 11.687163 | 12.973932 |
| 53 | 1 | 0 | 6.110090  | 12.596673 | 13.501011 |
| 54 | 6 | 0 | 4.338567  | 10.706363 | 14.900292 |
| 55 | 1 | 0 | 4.474105  | 11.543030 | 15.581701 |
| 56 | 6 | 0 | 11.867677 | 2.577609  | 7.307020  |
| 57 | 1 | 0 | 12.195863 | 2.392305  | 6.278619  |
| 58 | 1 | 0 | 12.551596 | 2.034129  | 7.973168  |
| 59 | 1 | 0 | 11.995540 | 3.648112  | 7.508841  |
| 60 | 6 | 0 | 14.385914 | 9.712197  | 3.463710  |
| 61 | 1 | 0 | 15.144066 | 10.261619 | 2.912636  |
| 62 | 6 | 0 | 14.232746 | 8.308543  | 3.232274  |
| 63 | 1 | 0 | 14.876893 | 7.816210  | 2.509089  |
| 64 | 6 | 0 | 6.526202  | 11.362108 | 11.807940 |
| 65 | 1 | 0 | 7.316457  | 12.035487 | 11.486522 |
| 66 | 6 | 0 | 13.162807 | 14.212168 | 7.599900  |
| 67 | 1 | 0 | 13.043379 | 13.144655 | 7.812191  |
| 68 | 1 | 0 | 14.222259 | 14.466423 | 7.740877  |
| 69 | 1 | 0 | 12.931153 | 14.367478 | 6.538971  |
| 70 | 6 | 0 | 3.486140  | 6.951340  | 14.978438 |



|     |   |   |           |           |           |
|-----|---|---|-----------|-----------|-----------|
| 71  | 1 | 0 | 3.173862  | 6.713816  | 15.992749 |
| 72  | 6 | 0 | 3.818228  | 5.902855  | 14.128745 |
| 73  | 1 | 0 | 3.753584  | 4.887490  | 14.512956 |
| 74  | 6 | 0 | 7.189931  | 0.963106  | 6.813512  |
| 75  | 1 | 0 | 7.601252  | 0.415633  | 5.958263  |
| 76  | 1 | 0 | 6.127908  | 0.693968  | 6.891909  |
| 77  | 1 | 0 | 7.686458  | 0.587060  | 7.716161  |
| 78  | 6 | 0 | 3.647784  | 8.338999  | 14.590866 |
| 79  | 6 | 0 | 7.352071  | 2.490259  | 6.669635  |
| 80  | 1 | 0 | 6.838518  | 2.786956  | 5.741548  |
| 81  | 6 | 0 | 10.045418 | 15.203140 | 5.633931  |
| 82  | 1 | 0 | 11.103321 | 15.471876 | 5.538124  |
| 83  | 1 | 0 | 9.496743  | 15.746869 | 4.852791  |
| 84  | 1 | 0 | 9.953370  | 14.132594 | 5.413505  |
| 85  | 6 | 0 | 3.766473  | 9.539992  | 15.394199 |
| 86  | 1 | 0 | 3.476792  | 9.511476  | 16.442073 |
| 87  | 6 | 0 | 10.050795 | 2.290599  | 9.038071  |
| 88  | 1 | 0 | 10.045483 | 3.345351  | 9.339512  |
| 89  | 1 | 0 | 10.788158 | 1.774597  | 9.668193  |
| 90  | 1 | 0 | 9.067381  | 1.871152  | 9.276041  |
| 91  | 6 | 0 | 7.961075  | 15.271232 | 7.065791  |
| 92  | 1 | 0 | 7.740438  | 14.204098 | 6.939092  |
| 93  | 1 | 0 | 7.453767  | 15.808725 | 6.253147  |
| 94  | 1 | 0 | 7.505085  | 15.595445 | 8.007950  |
| 95  | 6 | 0 | 10.589049 | 3.740900  | 3.917221  |
| 96  | 1 | 0 | 10.243652 | 4.773044  | 4.034454  |
| 97  | 1 | 0 | 10.721935 | 3.552596  | 2.842957  |
| 98  | 1 | 0 | 11.579105 | 3.665698  | 4.383521  |
| 99  | 6 | 0 | 9.592826  | 2.733160  | 4.521440  |
| 100 | 1 | 0 | 8.630884  | 2.886807  | 4.007788  |
| 101 | 6 | 0 | 10.044440 | 1.288241  | 4.222909  |
| 102 | 1 | 0 | 11.007232 | 1.059869  | 4.696064  |
| 103 | 1 | 0 | 10.172661 | 1.142101  | 3.141862  |
| 104 | 1 | 0 | 9.322392  | 0.540006  | 4.568174  |
| 105 | 6 | 0 | 9.549545  | 14.987576 | 10.127013 |

|     |   |   |           |           |           |
|-----|---|---|-----------|-----------|-----------|
| 106 | 1 | 0 | 8.521157  | 14.616396 | 9.998446  |
| 107 | 6 | 0 | 9.461535  | 16.486983 | 10.472237 |
| 108 | 1 | 0 | 10.455531 | 16.916922 | 10.645557 |
| 109 | 1 | 0 | 8.880877  | 16.639386 | 11.392133 |
| 110 | 1 | 0 | 8.980008  | 17.072021 | 9.679946  |
| 111 | 6 | 0 | 6.644024  | 3.220991  | 7.825435  |
| 112 | 1 | 0 | 7.106143  | 2.995585  | 8.794000  |
| 113 | 1 | 0 | 5.591168  | 2.913973  | 7.888689  |
| 114 | 1 | 0 | 6.665656  | 4.307216  | 7.689649  |
| 115 | 6 | 0 | 10.179067 | 14.197925 | 11.290464 |
| 116 | 1 | 0 | 10.208999 | 13.121284 | 11.087845 |
| 117 | 1 | 0 | 9.607837  | 14.348211 | 12.216831 |
| 118 | 1 | 0 | 11.206989 | 14.525652 | 11.490808 |

-----  
Optimized S0 geometry of **CORA-bisPA** (at the B3LYP/6-31G(d)/PCM level)  
-----

| Center<br>Number | Atomic<br>Number | Atomic<br>Type | Coordinates (Angstroms) |           |           |
|------------------|------------------|----------------|-------------------------|-----------|-----------|
|                  |                  |                | X                       | Y         | Z         |
| 1                | 14               | 0              | -3.979681               | 7.275793  | 36.222879 |
| 2                | 14               | 0              | 3.121610                | 9.232469  | 42.292247 |
| 3                | 14               | 0              | 11.087809               | 16.161344 | 36.887205 |
| 4                | 6                | 0              | 4.360448                | 12.153445 | 32.602375 |
| 5                | 6                | 0              | -3.679984               | 10.155182 | 30.123559 |
| 6                | 6                | 0              | -3.974004               | 9.475396  | 31.369024 |
| 7                | 6                | 0              | 4.711004                | 13.264225 | 31.843355 |
| 8                | 6                | 0              | 2.195651                | 11.799273 | 31.515289 |
| 9                | 6                | 0              | -2.975005               | 9.407994  | 32.391930 |
| 10               | 6                | 0              | -1.410553               | 10.674187 | 30.946759 |
| 11               | 6                | 0              | -2.393580               | 10.750480 | 29.929418 |
| 12               | 6                | 0              | -6.222644               | 8.945261  | 30.545970 |
| 13               | 6                | 0              | -1.702751               | 9.997251  | 32.187636 |
| 14               | 6                | 0              | 2.862667                | 10.778865 | 33.677126 |
| 15               | 6                | 0              | 3.145934                | 11.455384 | 32.444130 |
| 16               | 6                | 0              | -0.119120               | 11.245414 | 30.778235 |
| 17               | 1                | 0              | 0.087079                | 11.744135 | 29.837269 |

|    |   |   |           |           |           |
|----|---|---|-----------|-----------|-----------|
| 18 | 6 | 0 | 0.573094  | 10.475085 | 33.009054 |
| 19 | 6 | 0 | 4.841486  | 11.918954 | 33.906629 |
| 20 | 6 | 0 | 0.871356  | 11.175219 | 31.733258 |
| 21 | 6 | 0 | -4.674555 | 10.207774 | 29.128331 |
| 22 | 1 | 0 | -4.451279 | 10.716114 | 28.195463 |
| 23 | 6 | 0 | 1.599163  | 10.393660 | 34.073427 |
| 24 | 6 | 0 | -0.682739 | 9.933228  | 33.177175 |
| 25 | 1 | 0 | -0.915528 | 9.414467  | 34.101245 |
| 26 | 6 | 0 | -5.928974 | 9.625610  | 29.302462 |
| 27 | 6 | 0 | -5.243879 | 8.890919  | 31.537013 |
| 28 | 1 | 0 | -5.462399 | 8.378255  | 32.468583 |
| 29 | 6 | 0 | -3.540501 | 8.163956  | 34.658656 |
| 30 | 6 | 0 | 5.713195  | 12.761695 | 34.550393 |
| 31 | 6 | 0 | 3.903836  | 11.062891 | 34.574593 |
| 32 | 6 | 0 | -3.268590 | 8.741602  | 33.613309 |
| 33 | 6 | 0 | 2.608115  | 12.837081 | 30.601171 |
| 34 | 1 | 0 | 1.936840  | 13.155439 | 29.808148 |
| 35 | 6 | 0 | -2.101773 | 11.411182 | 28.704768 |
| 36 | 6 | 0 | 7.149614  | 12.530503 | 40.983121 |
| 37 | 6 | 0 | 6.103539  | 11.900791 | 40.237212 |
| 38 | 6 | 0 | 3.807293  | 13.532731 | 30.752724 |
| 39 | 1 | 0 | 4.014300  | 14.354891 | 30.071892 |
| 40 | 6 | 0 | 5.162740  | 11.068970 | 40.905651 |
| 41 | 6 | 0 | -7.514331 | 8.347407  | 30.713809 |
| 42 | 1 | 0 | -7.732111 | 7.836955  | 31.648596 |
| 43 | 6 | 0 | 3.770617  | 10.985543 | 35.944944 |
| 44 | 6 | 0 | -6.941905 | 9.674584  | 28.289704 |
| 45 | 1 | 0 | -6.718456 | 10.186757 | 27.357184 |
| 46 | 6 | 0 | 5.752277  | 14.067084 | 32.433836 |
| 47 | 1 | 0 | 6.129312  | 14.936780 | 31.901186 |
| 48 | 6 | 0 | 8.959576  | 14.384630 | 38.220379 |
| 49 | 6 | 0 | 5.828596  | 12.528437 | 36.007814 |
| 50 | 6 | 0 | 7.999390  | 13.574734 | 38.888096 |
| 51 | 6 | 0 | 6.814340  | 13.134602 | 36.756236 |
| 52 | 1 | 0 | 7.532625  | 13.780183 | 36.262246 |

|    |   |   |           |           |           |
|----|---|---|-----------|-----------|-----------|
| 53 | 6 | 0 | -1.853056 | 11.975524 | 27.646493 |
| 54 | 6 | 0 | 7.280695  | 12.341699 | 42.371944 |
| 55 | 1 | 0 | 6.571251  | 11.694954 | 42.877783 |
| 56 | 6 | 0 | 4.858296  | 11.644415 | 36.703199 |
| 57 | 6 | 0 | 1.474424  | 10.168433 | 35.481733 |
| 58 | 1 | 0 | 0.523950  | 9.850509  | 35.901214 |
| 59 | 6 | 0 | -8.452350 | 8.416751  | 29.720162 |
| 60 | 1 | 0 | -9.428314 | 7.959714  | 29.857826 |
| 61 | 6 | 0 | 2.514997  | 10.451894 | 36.378537 |
| 62 | 1 | 0 | 2.308366  | 10.337344 | 37.438954 |
| 63 | 6 | 0 | 6.954954  | 12.952951 | 38.160062 |
| 64 | 6 | 0 | 6.002934  | 12.105508 | 38.838444 |
| 65 | 6 | 0 | 6.224225  | 13.828947 | 33.724465 |
| 66 | 1 | 0 | 6.945604  | 14.529565 | 34.134927 |
| 67 | 6 | 0 | -8.162259 | 9.089657  | 28.491301 |
| 68 | 1 | 0 | -8.922854 | 9.132141  | 27.716704 |
| 69 | 6 | 0 | 8.105241  | 13.381000 | 40.302467 |
| 70 | 6 | 0 | 9.807379  | 15.073492 | 37.665471 |
| 71 | 6 | 0 | 4.351182  | 10.356411 | 41.484239 |
| 72 | 6 | 0 | 9.239595  | 13.810331 | 42.434291 |
| 73 | 6 | 0 | 4.984177  | 11.482435 | 38.065789 |
| 74 | 1 | 0 | 4.287005  | 10.835857 | 38.587982 |
| 75 | 6 | 0 | 8.291684  | 12.951911 | 43.112121 |
| 76 | 6 | 0 | 9.120605  | 13.997742 | 41.058122 |
| 77 | 1 | 0 | 9.829720  | 14.642261 | 40.548910 |
| 78 | 6 | 0 | 8.426039  | 12.760798 | 44.526199 |
| 79 | 1 | 0 | 7.713525  | 12.114449 | 45.032467 |
| 80 | 6 | 0 | 11.771463 | 16.894850 | 34.162719 |
| 81 | 6 | 0 | 10.272345 | 14.437631 | 43.204986 |
| 82 | 1 | 0 | 10.982560 | 15.082143 | 42.693123 |
| 83 | 6 | 0 | 3.321466  | 9.338164  | 44.206257 |
| 84 | 1 | 0 | 2.632190  | 10.143615 | 44.504062 |
| 85 | 6 | 0 | 9.427946  | 13.378492 | 45.223765 |
| 86 | 1 | 0 | 9.520564  | 13.227147 | 46.295615 |
| 87 | 6 | 0 | -5.570741 | 8.106303  | 36.901017 |

|     |   |   |           |           |           |
|-----|---|---|-----------|-----------|-----------|
| 88  | 1 | 0 | -5.238081 | 9.130450  | 37.130486 |
| 89  | 6 | 0 | 10.542102 | 18.363729 | 38.678748 |
| 90  | 1 | 0 | 9.854226  | 17.732164 | 39.254499 |
| 91  | 1 | 0 | 10.213721 | 19.404431 | 38.805679 |
| 92  | 1 | 0 | 11.534511 | 18.276468 | 39.133760 |
| 93  | 6 | 0 | 10.363648 | 14.228901 | 44.554141 |
| 94  | 1 | 0 | 11.150906 | 14.708733 | 45.128869 |
| 95  | 6 | 0 | -2.354138 | 9.020697  | 37.847391 |
| 96  | 1 | 0 | -2.113969 | 9.630943  | 36.967456 |
| 97  | 1 | 0 | -1.527411 | 9.135151  | 38.561848 |
| 98  | 1 | 0 | -3.248443 | 9.450887  | 38.311872 |
| 99  | 6 | 0 | 12.782748 | 15.731806 | 37.689616 |
| 100 | 1 | 0 | 13.089318 | 14.810502 | 37.169676 |
| 101 | 6 | 0 | 2.862825  | 8.055547  | 44.931803 |
| 102 | 1 | 0 | 1.846247  | 7.752970  | 44.656574 |
| 103 | 1 | 0 | 2.875704  | 8.205423  | 46.019808 |
| 104 | 1 | 0 | 3.526923  | 7.210725  | 44.714433 |
| 105 | 6 | 0 | -6.719818 | 8.230431  | 35.882847 |
| 106 | 1 | 0 | -6.393954 | 8.719392  | 34.958238 |
| 107 | 1 | 0 | -7.541914 | 8.827024  | 36.301374 |
| 108 | 1 | 0 | -7.134432 | 7.251467  | 35.615796 |
| 109 | 6 | 0 | 10.544135 | 17.975145 | 37.187643 |
| 110 | 1 | 0 | 11.295709 | 18.599108 | 36.679406 |
| 111 | 6 | 0 | -4.100292 | 5.413846  | 35.773443 |
| 112 | 1 | 0 | -3.132980 | 5.208441  | 35.288850 |
| 113 | 6 | 0 | -2.546163 | 7.540038  | 37.467530 |
| 114 | 1 | 0 | -2.839321 | 6.997810  | 38.380099 |
| 115 | 6 | 0 | 4.726567  | 9.748412  | 44.684902 |
| 116 | 1 | 0 | 5.489705  | 9.018700  | 44.388798 |
| 117 | 1 | 0 | 4.753686  | 9.822186  | 45.780845 |
| 118 | 1 | 0 | 5.022632  | 10.720952 | 44.278738 |
| 119 | 6 | 0 | -4.203112 | 4.483829  | 36.998898 |
| 120 | 1 | 0 | -3.394944 | 4.652181  | 37.719738 |
| 121 | 1 | 0 | -4.151262 | 3.431709  | 36.687584 |
| 122 | 1 | 0 | -5.153142 | 4.616522  | 37.529514 |

|     |   |   |           |           |           |
|-----|---|---|-----------|-----------|-----------|
| 123 | 6 | 0 | 1.372688  | 9.902214  | 41.858706 |
| 124 | 1 | 0 | 1.276450  | 10.792616 | 42.500353 |
| 125 | 6 | 0 | -1.220029 | 6.932124  | 36.971937 |
| 126 | 1 | 0 | -1.300795 | 5.856263  | 36.780494 |
| 127 | 1 | 0 | -0.424230 | 7.074485  | 37.715896 |
| 128 | 1 | 0 | -0.885704 | 7.407610  | 36.041246 |
| 129 | 6 | 0 | 9.892753  | 15.215363 | 34.393601 |
| 130 | 6 | 0 | -6.072945 | 7.483489  | 38.219329 |
| 131 | 1 | 0 | -6.472818 | 6.474801  | 38.060819 |
| 132 | 1 | 0 | -6.883971 | 8.088280  | 38.646949 |
| 133 | 1 | 0 | -5.283489 | 7.412072  | 38.976796 |
| 134 | 6 | 0 | 3.465716  | 7.461642  | 41.643407 |
| 135 | 1 | 0 | 2.781869  | 6.803308  | 42.201013 |
| 136 | 6 | 0 | 13.863069 | 16.796763 | 37.409697 |
| 137 | 1 | 0 | 14.000565 | 16.982989 | 36.338874 |
| 138 | 1 | 0 | 14.833661 | 16.475760 | 37.811462 |
| 139 | 1 | 0 | 13.618102 | 17.755352 | 37.883368 |
| 140 | 6 | 0 | 12.728231 | 15.400105 | 39.192764 |
| 141 | 1 | 0 | 12.429976 | 16.267926 | 39.793253 |
| 142 | 1 | 0 | 13.717436 | 15.083784 | 39.551381 |
| 143 | 1 | 0 | 12.023169 | 14.589672 | 39.404293 |
| 144 | 6 | 0 | 4.907999  | 7.007545  | 41.947731 |
| 145 | 1 | 0 | 5.070636  | 5.979142  | 41.597311 |
| 146 | 1 | 0 | 5.139018  | 7.029135  | 43.018417 |
| 147 | 1 | 0 | 5.638486  | 7.647610  | 41.438596 |
| 148 | 6 | 0 | -5.197354 | 5.082340  | 34.744407 |
| 149 | 1 | 0 | -6.199644 | 5.203363  | 35.172139 |
| 150 | 1 | 0 | -5.112409 | 4.038654  | 34.412238 |
| 151 | 1 | 0 | -5.132871 | 5.718659  | 33.854421 |
| 152 | 6 | 0 | 9.171212  | 18.284848 | 36.558617 |
| 153 | 1 | 0 | 9.158128  | 18.114068 | 35.476598 |
| 154 | 1 | 0 | 8.896096  | 19.334794 | 36.728590 |
| 155 | 1 | 0 | 8.383524  | 17.663824 | 37.002162 |
| 156 | 6 | 0 | 3.164624  | 7.283770  | 40.142911 |
| 157 | 1 | 0 | 3.771842  | 7.960635  | 39.529132 |

|     |    |   |           |           |           |
|-----|----|---|-----------|-----------|-----------|
| 158 | 1  | 0 | 2.111949  | 7.468651  | 39.903637 |
| 159 | 1  | 0 | 3.397564  | 6.258875  | 39.823032 |
| 160 | 6  | 0 | 1.194190  | 10.379229 | 40.405385 |
| 161 | 1  | 0 | 1.956542  | 11.112286 | 40.120910 |
| 162 | 1  | 0 | 0.211079  | 10.851894 | 40.274454 |
| 163 | 1  | 0 | 1.248742  | 9.546301  | 39.694084 |
| 164 | 6  | 0 | 0.243122  | 8.929436  | 42.254511 |
| 165 | 1  | 0 | 0.290426  | 7.997554  | 41.677189 |
| 166 | 1  | 0 | -0.739775 | 9.380371  | 42.061493 |
| 167 | 1  | 0 | 0.274844  | 8.663184  | 43.316925 |
| 168 | 14 | 0 | -1.439844 | 12.789977 | 26.036458 |
| 169 | 6  | 0 | -2.838893 | 14.033633 | 25.601348 |
| 170 | 1  | 0 | -2.584450 | 14.944236 | 26.165019 |
| 171 | 6  | 0 | 0.231847  | 13.687907 | 26.314997 |
| 172 | 1  | 0 | 0.911663  | 12.897561 | 26.668535 |
| 173 | 6  | 0 | -2.518235 | 10.565776 | 24.537110 |
| 174 | 6  | 0 | -0.038456 | 10.491235 | 25.037318 |
| 175 | 6  | 0 | -4.242733 | 13.596144 | 26.062360 |
| 176 | 6  | 0 | 0.839932  | 14.280179 | 25.028475 |
| 177 | 6  | 0 | -1.240098 | 11.404801 | 24.727118 |
| 178 | 1  | 0 | -1.033771 | 11.920587 | 23.776464 |
| 179 | 6  | 0 | 0.154820  | 14.756779 | 27.421403 |
| 180 | 6  | 0 | 11.202409 | 15.738619 | 35.011558 |
| 181 | 1  | 0 | 11.930183 | 14.913418 | 34.967176 |
| 182 | 1  | 0 | 0.905366  | 11.046122 | 25.083548 |
| 183 | 1  | 0 | -0.168557 | 9.976107  | 25.997148 |
| 184 | 1  | 0 | 0.071476  | 9.718928  | 24.263888 |
| 185 | 1  | 0 | -2.804167 | 10.060742 | 25.467877 |
| 186 | 1  | 0 | -3.370364 | 11.173601 | 24.213398 |
| 187 | 1  | 0 | -2.361976 | 9.787878  | 23.777216 |
| 188 | 1  | 0 | 1.836490  | 14.697331 | 25.227360 |
| 189 | 1  | 0 | 0.950386  | 13.532516 | 24.234330 |
| 190 | 1  | 0 | 0.223686  | 15.096712 | 24.632942 |
| 191 | 1  | 0 | 1.150825  | 15.167455 | 27.636915 |
| 192 | 1  | 0 | -0.481600 | 15.599528 | 27.123545 |

|     |   |   |           |           |           |
|-----|---|---|-----------|-----------|-----------|
| 193 | 1 | 0 | -0.249615 | 14.352478 | 28.356490 |
| 194 | 6 | 0 | -2.854388 | 14.409570 | 24.104756 |
| 195 | 1 | 0 | -3.118918 | 13.550662 | 23.475850 |
| 196 | 1 | 0 | -3.600306 | 15.192682 | 23.912779 |
| 197 | 1 | 0 | -1.887033 | 14.787461 | 23.755472 |
| 198 | 1 | 0 | -4.271808 | 13.384478 | 27.136129 |
| 199 | 1 | 0 | -4.979272 | 14.384252 | 25.854066 |
| 200 | 1 | 0 | -4.578351 | 12.693270 | 25.537616 |
| 201 | 1 | 0 | 9.524313  | 14.328593 | 34.919290 |
| 202 | 1 | 0 | 9.100022  | 15.973229 | 34.420184 |
| 203 | 1 | 0 | 10.044821 | 14.940536 | 33.340875 |
| 204 | 1 | 0 | 11.912631 | 16.573030 | 33.122095 |
| 205 | 1 | 0 | 11.092115 | 17.755407 | 34.145496 |
| 206 | 1 | 0 | 12.741690 | 17.249578 | 34.527623 |

-----  
 Optimized S0 geometry of C<sub>60</sub> (at the M06-2X/6-31G(d)/PCM level)  
 -----

| Center<br>Number | Atomic<br>Number | Atomic<br>Type | Coordinates (Angstroms) |           |           |
|------------------|------------------|----------------|-------------------------|-----------|-----------|
|                  |                  |                | X                       | Y         | Z         |
| 1                | 6                | 0              | -1.361719               | -2.395828 | 2.221062  |
| 2                | 6                | 0              | -1.807699               | -2.896849 | 0.933725  |
| 3                | 6                | 0              | -0.888494               | -3.426295 | 0.039349  |
| 4                | 6                | 0              | 0.519058                | -3.479471 | 0.391053  |
| 5                | 6                | 0              | 0.945273                | -3.000823 | 1.621404  |
| 6                | 6                | 0              | -0.016607               | -2.446087 | 2.556525  |
| 7                | 6                | 0              | -2.144744               | -1.216439 | 2.539654  |
| 8                | 6                | 0              | -3.075257               | -0.988250 | 1.449484  |
| 9                | 6                | 0              | -2.867059               | -2.026428 | 0.456343  |
| 10               | 6                | 0              | -2.960473               | -1.722995 | -0.894341 |
| 11               | 6                | 0              | -0.986390               | -3.108944 | -1.373294 |
| 12               | 6                | 0              | 1.291044                | -3.195936 | -0.804974 |
| 13               | 6                | 0              | 2.455551                | -2.446757 | -0.718553 |
| 14               | 6                | 0              | 2.901565                | -1.946257 | 0.568650  |
| 15               | 6                | 0              | 2.163576                | -2.217295 | 1.712205  |
| 16               | 6                | 0              | 1.955420                | -1.179475 | 2.705075  |



|    |   |   |           |           |           |
|----|---|---|-----------|-----------|-----------|
| 17 | 6 | 0 | 0.607975  | -1.320619 | 3.226673  |
| 18 | 6 | 0 | -0.140283 | -0.192801 | 3.531291  |
| 19 | 6 | 0 | -1.547400 | -0.139541 | 3.179573  |
| 20 | 6 | 0 | -3.367532 | 0.307425  | 1.048027  |
| 21 | 6 | 0 | -2.743013 | 1.433865  | 1.717737  |
| 22 | 6 | 0 | -1.853023 | 1.215347  | 2.759327  |
| 23 | 6 | 0 | -0.635188 | 1.999592  | 2.850066  |
| 24 | 6 | 0 | 0.423509  | 1.128946  | 3.327205  |
| 25 | 6 | 0 | 1.710978  | 1.264048  | 2.828544  |
| 26 | 6 | 0 | 2.494349  | 0.084035  | 2.510366  |
| 27 | 6 | 0 | 3.266679  | 0.367538  | 1.314263  |
| 28 | 6 | 0 | 3.465065  | -0.624539 | 0.364895  |
| 29 | 6 | 0 | 0.360188  | -2.967778 | -1.895205 |
| 30 | 6 | 0 | 2.144743  | 1.216440  | -2.539654 |
| 31 | 6 | 0 | 1.547399  | 0.139542  | -3.179573 |
| 32 | 6 | 0 | 0.140284  | 0.192802  | -3.531291 |
| 33 | 6 | 0 | -0.607974 | 1.320620  | -3.226673 |
| 34 | 6 | 0 | 0.016606  | 2.446086  | -2.556526 |
| 35 | 6 | 0 | 1.807698  | 2.896849  | -0.933725 |
| 36 | 6 | 0 | 2.867059  | 2.026427  | -0.456344 |
| 37 | 6 | 0 | 3.075257  | 0.988251  | -1.449482 |
| 38 | 6 | 0 | 3.367532  | -0.307424 | -1.048026 |
| 39 | 6 | 0 | 2.743013  | -1.433867 | -1.717737 |
| 40 | 6 | 0 | 1.853023  | -1.215348 | -2.759327 |
| 41 | 6 | 0 | -0.423509 | -1.128946 | -3.327204 |
| 42 | 6 | 0 | -1.710977 | -1.264048 | -2.828543 |
| 43 | 6 | 0 | -2.494349 | -0.084034 | -2.510365 |
| 44 | 6 | 0 | -1.955421 | 1.179477  | -2.705076 |
| 45 | 6 | 0 | -2.163576 | 2.217296  | -1.712206 |
| 46 | 6 | 0 | -0.945274 | 3.000823  | -1.621405 |
| 47 | 6 | 0 | -0.519058 | 3.479471  | -0.391053 |
| 48 | 6 | 0 | 0.888494  | 3.426295  | -0.039349 |
| 49 | 6 | 0 | 2.960474  | 1.722995  | 0.894342  |
| 50 | 6 | 0 | 1.998823  | 2.276700  | 1.829614  |
| 51 | 6 | 0 | 0.986389  | 3.108943  | 1.373294  |

|    |   |   |           |           |           |
|----|---|---|-----------|-----------|-----------|
| 52 | 6 | 0 | -0.360187 | 2.967776  | 1.895205  |
| 53 | 6 | 0 | -1.291045 | 3.195935  | 0.804973  |
| 54 | 6 | 0 | -2.455550 | 2.446757  | 0.718553  |
| 55 | 6 | 0 | -2.901566 | 1.946257  | -0.568650 |
| 56 | 6 | 0 | -3.465065 | 0.624540  | -0.364896 |
| 57 | 6 | 0 | -3.266679 | -0.367537 | -1.314263 |
| 58 | 6 | 0 | 0.635189  | -1.999592 | -2.850066 |
| 59 | 6 | 0 | -1.998823 | -2.276699 | -1.829613 |
| 60 | 6 | 0 | 1.361719  | 2.395827  | -2.221063 |

-----  
Optimized S0 geometry of **CORA-monPA** (at the M06-2X/6-31G(d)/PCM level)  
-----

| Center<br>Number | Atomic<br>Number | Atomic<br>Type | Coordinates (Angstroms) |           |           |
|------------------|------------------|----------------|-------------------------|-----------|-----------|
|                  |                  |                | X                       | Y         | Z         |
| 1                | 14               | 0              | -6.070585               | -0.983656 | -0.248994 |
| 2                | 14               | 0              | 5.701855                | -2.063803 | -0.062985 |
| 3                | 6                | 0              | 0.386220                | -2.889190 | 0.075497  |
| 4                | 6                | 0              | 1.220421                | -1.740979 | -0.026119 |
| 5                | 6                | 0              | -1.860975               | -3.869590 | 0.144619  |
| 6                | 1                | 0              | -2.940747               | -3.745455 | 0.130871  |
| 7                | 6                | 0              | 2.638004                | -1.893625 | -0.023391 |
| 8                | 6                | 0              | 0.965290                | 1.969827  | -0.351378 |
| 9                | 6                | 0              | -0.505710               | 2.139096  | -0.357888 |
| 10               | 6                | 0              | -1.296347               | 1.025263  | -0.256198 |
| 11               | 1                | 0              | -2.377448               | 1.132830  | -0.257453 |
| 12               | 6                | 0              | -1.320266               | -5.142453 | 0.259487  |
| 13               | 6                | 0              | -4.226746               | -1.136844 | -0.182060 |
| 14               | 6                | 0              | 1.795947                | 5.588074  | -0.523802 |
| 15               | 6                | 0              | -1.598431               | -1.420963 | -0.069633 |
| 16               | 6                | 0              | -0.484875               | 5.852084  | -0.532415 |
| 17               | 6                | 0              | -0.763990               | -0.292058 | -0.150955 |
| 18               | 6                | 0              | 1.219258                | 4.322054  | -0.745659 |
| 19               | 6                | 0              | 3.852660                | -2.000664 | -0.025708 |
| 20               | 6                | 0              | 0.112070                | -5.303273 | 0.288852  |
| 21               | 6                | 0              | -0.211668               | 4.487529  | -0.750674 |

|    |   |   |           |           |           |
|----|---|---|-----------|-----------|-----------|
| 22 | 6 | 0 | 0.663019  | -0.454622 | -0.134909 |
| 23 | 6 | 0 | 6.192969  | -2.716350 | -1.773548 |
| 24 | 1 | 0 | 7.284661  | -2.852828 | -1.763751 |
| 25 | 6 | 0 | -1.044820 | -2.727470 | 0.050542  |
| 26 | 6 | 0 | 0.654356  | -6.626758 | 0.413613  |
| 27 | 1 | 0 | 1.734867  | -6.740961 | 0.437972  |
| 28 | 6 | 0 | 0.925392  | -4.183049 | 0.196108  |
| 29 | 1 | 0 | 2.005870  | -4.301705 | 0.216953  |
| 30 | 6 | 0 | 3.045203  | 5.766363  | 0.040127  |
| 31 | 6 | 0 | 1.481210  | 0.706701  | -0.238039 |
| 32 | 1 | 0 | 2.558478  | 0.565693  | -0.237760 |
| 33 | 6 | 0 | -2.147100 | -6.312783 | 0.350252  |
| 34 | 1 | 0 | -3.226109 | -6.184233 | 0.322824  |
| 35 | 6 | 0 | -3.015123 | -1.263083 | -0.120913 |
| 36 | 6 | 0 | 0.749235  | 6.533283  | -0.391655 |
| 37 | 6 | 0 | -1.663638 | 6.311547  | 0.023985  |
| 38 | 6 | 0 | 1.851245  | 3.153052  | -0.421599 |
| 39 | 6 | 0 | -6.681460 | -1.099309 | 1.543653  |
| 40 | 1 | 0 | -7.772701 | -0.962016 | 1.512810  |
| 41 | 6 | 0 | -2.395213 | 3.953736  | -0.021153 |
| 42 | 1 | 0 | -3.169866 | 3.231596  | 0.222546  |
| 43 | 6 | 0 | -2.670208 | 5.298970  | 0.189542  |
| 44 | 1 | 0 | -3.647031 | 5.571074  | 0.580912  |
| 45 | 6 | 0 | 6.316198  | -3.195670 | 1.336984  |
| 46 | 1 | 0 | 6.472182  | -2.542408 | 2.208039  |
| 47 | 6 | 0 | -1.096429 | 3.494348  | -0.430847 |
| 48 | 6 | 0 | 7.665961  | -3.839945 | 0.986114  |
| 49 | 1 | 0 | 7.566216  | -4.527390 | 0.137818  |
| 50 | 1 | 0 | 8.047925  | -4.420530 | 1.834348  |
| 51 | 1 | 0 | 8.427871  | -3.098544 | 0.720757  |
| 52 | 6 | 0 | 3.792572  | 4.550278  | 0.209835  |
| 53 | 1 | 0 | 4.803314  | 4.591627  | 0.607509  |
| 54 | 6 | 0 | 3.263806  | 7.086534  | 0.594727  |
| 55 | 1 | 0 | 4.239839  | 7.336845  | 1.002277  |
| 56 | 6 | 0 | -6.380611 | -2.471509 | 2.160313  |

|    |   |   |           |           |           |
|----|---|---|-----------|-----------|-----------|
| 57 | 1 | 0 | -6.905038 | -3.281818 | 1.644351  |
| 58 | 1 | 0 | -6.684613 | -2.496820 | 3.213941  |
| 59 | 1 | 0 | -5.305892 | -2.689820 | 2.122207  |
| 60 | 6 | 0 | -0.166116 | -7.708497 | 0.498989  |
| 61 | 1 | 0 | 0.252647  | -8.705442 | 0.593437  |
| 62 | 6 | 0 | -1.590888 | -7.549016 | 0.464787  |
| 63 | 1 | 0 | -2.223325 | -8.428802 | 0.530189  |
| 64 | 6 | 0 | 3.218786  | 3.303661  | -0.004865 |
| 65 | 1 | 0 | 3.808354  | 2.424020  | 0.240581  |
| 66 | 6 | 0 | 5.291809  | -4.266989 | 1.732559  |
| 67 | 1 | 0 | 4.349702  | -3.822690 | 2.067688  |
| 68 | 1 | 0 | 5.681678  | -4.895017 | 2.542999  |
| 69 | 1 | 0 | 5.060867  | -4.928050 | 0.888316  |
| 70 | 6 | 0 | -0.372921 | 8.307873  | 0.716140  |
| 71 | 1 | 0 | -0.363917 | 9.270416  | 1.220867  |
| 72 | 6 | 0 | -1.578468 | 7.646686  | 0.579339  |
| 73 | 1 | 0 | -2.474171 | 8.112374  | 0.981893  |
| 74 | 6 | 0 | -7.876383 | 1.211122  | -0.576122 |
| 75 | 1 | 0 | -8.676162 | 0.484529  | -0.755221 |
| 76 | 1 | 0 | -8.140465 | 2.131108  | -1.110900 |
| 77 | 1 | 0 | -7.878042 | 1.444294  | 0.494819  |
| 78 | 6 | 0 | 0.882899  | 7.708999  | 0.311090  |
| 79 | 6 | 0 | -6.502254 | 0.697981  | -1.033593 |
| 80 | 1 | 0 | -6.558952 | 0.510176  | -2.115613 |
| 81 | 6 | 0 | 5.537901  | -4.072774 | -2.067400 |
| 82 | 1 | 0 | 5.839624  | -4.843501 | -1.349920 |
| 83 | 1 | 0 | 5.811047  | -4.427296 | -3.068681 |
| 84 | 1 | 0 | 4.444535  | -3.992533 | -2.030614 |
| 85 | 6 | 0 | 2.239960  | 8.005748  | 0.723481  |
| 86 | 1 | 0 | 2.448285  | 8.946168  | 1.226887  |
| 87 | 6 | 0 | -6.075157 | 0.010897  | 2.412337  |
| 88 | 1 | 0 | -4.980875 | -0.061070 | 2.425044  |
| 89 | 1 | 0 | -6.425036 | -0.073861 | 3.448372  |
| 90 | 1 | 0 | -6.339096 | 1.011135  | 2.054236  |
| 91 | 6 | 0 | 5.841914  | -1.702795 | -2.869818 |

|     |   |   |           |           |           |
|-----|---|---|-----------|-----------|-----------|
| 92  | 1 | 0 | 4.768599  | -1.476297 | -2.863239 |
| 93  | 1 | 0 | 6.087674  | -2.102678 | -3.861063 |
| 94  | 1 | 0 | 6.383966  | -0.759130 | -2.747605 |
| 95  | 6 | 0 | -5.914094 | -3.694789 | -1.226076 |
| 96  | 1 | 0 | -4.863252 | -3.533463 | -1.486288 |
| 97  | 1 | 0 | -6.317029 | -4.460195 | -1.900558 |
| 98  | 1 | 0 | -5.946177 | -4.104546 | -0.209821 |
| 99  | 6 | 0 | -6.725470 | -2.397667 | -1.339789 |
| 100 | 1 | 0 | -6.618439 | -2.032113 | -2.371682 |
| 101 | 6 | 0 | -8.217553 | -2.657404 | -1.087708 |
| 102 | 1 | 0 | -8.393201 | -3.008205 | -0.063944 |
| 103 | 1 | 0 | -8.597053 | -3.429152 | -1.767989 |
| 104 | 1 | 0 | -8.825106 | -1.758497 | -1.238635 |
| 105 | 6 | 0 | 6.276651  | -0.273172 | 0.173236  |
| 106 | 1 | 0 | 5.849392  | 0.288641  | -0.670997 |
| 107 | 6 | 0 | 7.805211  | -0.159381 | 0.109754  |
| 108 | 1 | 0 | 8.270136  | -0.691381 | 0.948981  |
| 109 | 1 | 0 | 8.124184  | 0.887884  | 0.173892  |
| 110 | 1 | 0 | 8.214452  | -0.575962 | -0.818138 |
| 111 | 6 | 0 | -5.423108 | 1.764937  | -0.804605 |
| 112 | 1 | 0 | -5.252335 | 1.937727  | 0.265368  |
| 113 | 1 | 0 | -5.720674 | 2.722841  | -1.249505 |
| 114 | 1 | 0 | -4.468102 | 1.469167  | -1.251163 |
| 115 | 6 | 0 | 5.737325  | 0.340272  | 1.470564  |
| 116 | 1 | 0 | 4.644533  | 0.278282  | 1.528946  |
| 117 | 1 | 0 | 6.022479  | 1.396971  | 1.551054  |
| 118 | 1 | 0 | 6.144868  | -0.172021 | 2.350488  |

-----  
Optimized S0 geometry of **TS1** (at the M06-2X/6-31G(d)/PCM level)  
-----

| Center<br>Number | Atomic<br>Number | Atomic<br>Type | Coordinates (Angstroms) |           |          |
|------------------|------------------|----------------|-------------------------|-----------|----------|
|                  |                  |                | X                       | Y         | Z        |
| 1                | 14               | 0              | -2.256993               | 5.813017  | 1.476853 |
| 2                | 14               | 0              | -1.017854               | -5.831150 | 1.824477 |
| 3                | 6                | 0              | -2.933336               | 0.583058  | 1.684737 |

|    |   |   |           |           |           |
|----|---|---|-----------|-----------|-----------|
| 4  | 6 | 0 | -4.886546 | -1.092953 | 0.469013  |
| 5  | 6 | 0 | -3.795473 | -1.633817 | 1.107729  |
| 6  | 1 | 0 | -3.676712 | -2.713133 | 1.142426  |
| 7  | 6 | 0 | -7.007878 | -1.306329 | -0.628161 |
| 8  | 6 | 0 | -7.146936 | 0.125770  | -0.660984 |
| 9  | 6 | 0 | -5.027143 | 0.371861  | 0.431871  |
| 10 | 6 | 0 | 0.870062  | 1.478327  | 0.452397  |
| 11 | 6 | 0 | -7.885681 | -1.843885 | -1.591197 |
| 12 | 6 | 0 | -1.669511 | -1.421112 | 2.359936  |
| 13 | 6 | 0 | -5.874364 | -1.952922 | -0.216621 |
| 14 | 6 | 0 | 0.230059  | 0.667637  | -0.464397 |
| 15 | 6 | 0 | -2.802002 | -0.839278 | 1.730577  |
| 16 | 6 | 0 | -0.708013 | -0.603627 | 2.974666  |
| 17 | 6 | 0 | -0.827477 | 0.817778  | 2.908103  |
| 18 | 6 | 0 | -4.057846 | 1.141553  | 1.029633  |
| 19 | 1 | 0 | -4.141316 | 2.223946  | 1.000583  |
| 20 | 6 | 0 | 1.114713  | -1.331291 | 0.663020  |
| 21 | 6 | 0 | -7.680554 | -3.063417 | -2.208131 |
| 22 | 6 | 0 | -8.108092 | 0.440847  | -1.642515 |
| 23 | 6 | 0 | -8.565017 | -0.770300 | -2.218073 |
| 24 | 6 | 0 | -9.078452 | -0.848768 | -3.493072 |
| 25 | 6 | 0 | 1.571889  | 0.932177  | 1.626953  |
| 26 | 6 | 0 | -6.600887 | -3.832367 | -1.650808 |
| 27 | 1 | 0 | -6.387915 | -4.823592 | -2.043332 |
| 28 | 6 | 0 | -5.736029 | -3.297922 | -0.705247 |
| 29 | 1 | 0 | -4.879774 | -3.895649 | -0.404629 |
| 30 | 6 | 0 | 2.795517  | 1.743588  | 1.754075  |
| 31 | 6 | 0 | 0.355461  | -0.790191 | -0.353530 |
| 32 | 6 | 0 | -2.005478 | 2.820268  | 2.110254  |
| 33 | 6 | 0 | -6.159711 | 0.995396  | -0.284841 |
| 34 | 6 | 0 | 1.693874  | -0.505099 | 1.735899  |
| 35 | 6 | 0 | -1.470667 | -2.833061 | 2.299106  |
| 36 | 6 | 0 | 3.035703  | -1.069714 | 1.968077  |
| 37 | 6 | 0 | 5.227207  | 1.686198  | 1.476124  |
| 38 | 6 | 0 | 0.516849  | -1.122721 | 3.511826  |

|    |   |   |           |           |           |
|----|---|---|-----------|-----------|-----------|
| 39 | 1 | 0 | 0.656923  | -2.202358 | 3.494030  |
| 40 | 6 | 0 | 4.014095  | 1.185866  | 2.085264  |
| 41 | 6 | 0 | 3.178129  | -2.286106 | 1.203608  |
| 42 | 6 | 0 | -8.397012 | -3.228972 | -3.455938 |
| 43 | 1 | 0 | -8.342817 | -4.181155 | -3.977177 |
| 44 | 6 | 0 | 2.742273  | 2.835487  | 0.810203  |
| 45 | 6 | 0 | -6.283353 | 2.320146  | -0.830533 |
| 46 | 1 | 0 | -5.560402 | 3.085561  | -0.559097 |
| 47 | 6 | 0 | 1.267945  | -0.358810 | 4.449348  |
| 48 | 6 | 0 | 1.985936  | -2.447627 | 0.396428  |
| 49 | 6 | 0 | -1.922465 | 1.402742  | 2.253464  |
| 50 | 6 | 0 | -9.058708 | -2.179818 | -4.064465 |
| 51 | 1 | 0 | -9.502747 | -2.343506 | -5.042841 |
| 52 | 6 | 0 | -8.141951 | 1.649463  | -2.311749 |
| 53 | 6 | 0 | 1.550396  | 2.668522  | 0.003161  |
| 54 | 6 | 0 | 1.158577  | 1.052672  | 4.368883  |
| 55 | 6 | 0 | 0.294383  | 1.581704  | 3.370177  |
| 56 | 1 | 0 | 0.261868  | 2.660875  | 3.231513  |
| 57 | 6 | 0 | 4.137902  | -0.272061 | 2.196202  |
| 58 | 6 | 0 | 0.260605  | 1.006106  | -1.870788 |
| 59 | 6 | 0 | 6.099857  | 0.556063  | 1.211740  |
| 60 | 6 | 0 | -9.316199 | 0.434910  | -4.120978 |
| 61 | 1 | 0 | -9.780749 | 0.468393  | -5.103030 |
| 62 | 6 | 0 | -7.233440 | 2.635968  | -1.792526 |
| 63 | 1 | 0 | -7.217060 | 3.632412  | -2.226325 |
| 64 | 6 | 0 | 5.425179  | -0.650436 | 1.655564  |
| 65 | 6 | 0 | 5.991076  | 2.719045  | -0.623592 |
| 66 | 6 | 0 | 0.459383  | -1.331139 | -1.691050 |
| 67 | 6 | 0 | 1.291900  | -2.415503 | -1.951169 |
| 68 | 6 | 0 | -1.282375 | -4.033862 | 2.196696  |
| 69 | 6 | 0 | 6.882704  | 0.533788  | 0.065791  |
| 70 | 6 | 0 | 2.070566  | -2.991717 | -0.878209 |
| 71 | 6 | 0 | 6.825511  | 1.638842  | -0.873821 |
| 72 | 6 | 0 | -2.100492 | 4.025419  | 1.947884  |
| 73 | 6 | 0 | 2.105293  | -2.435245 | -3.151131 |

|     |   |   |           |           |           |
|-----|---|---|-----------|-----------|-----------|
| 74  | 6 | 0 | 2.000190  | 1.861892  | 5.170390  |
| 75  | 1 | 0 | 1.926850  | 2.942904  | 5.089049  |
| 76  | 6 | 0 | 1.563915  | 3.012961  | -1.341491 |
| 77  | 6 | 0 | 5.178892  | 2.747362  | 0.577459  |
| 78  | 6 | 0 | 3.904318  | 3.338971  | 0.239240  |
| 79  | 6 | 0 | 2.046105  | -1.377463 | -4.047716 |
| 80  | 6 | 0 | -8.874098 | 1.618065  | -3.560990 |
| 81  | 1 | 0 | -9.005988 | 2.539426  | -4.122279 |
| 82  | 6 | 0 | 0.399076  | -0.224824 | -2.628706 |
| 83  | 6 | 0 | 6.924453  | 1.091963  | -2.212918 |
| 84  | 6 | 0 | 4.414763  | -2.671031 | 0.703084  |
| 85  | 6 | 0 | 6.183467  | 1.647165  | -3.246766 |
| 86  | 6 | 0 | 2.781254  | 3.528286  | -1.942871 |
| 87  | 6 | 0 | 5.528175  | 0.785400  | -4.213467 |
| 88  | 6 | 0 | 5.567751  | -1.830000 | 0.931199  |
| 89  | 6 | 0 | 3.387085  | -3.033180 | -2.818304 |
| 90  | 6 | 0 | 1.172963  | -0.248458 | -3.780964 |
| 91  | 6 | 0 | 3.923652  | 3.686514  | -1.172005 |
| 92  | 6 | 0 | 3.366677  | -3.379743 | -1.409678 |
| 93  | 6 | 0 | 5.217066  | 3.302027  | -1.705574 |
| 94  | 6 | 0 | 7.023625  | -0.695742 | -0.693129 |
| 95  | 6 | 0 | 0.904902  | 2.160688  | -2.304198 |
| 96  | 6 | 0 | 7.046564  | -0.351292 | -2.101266 |
| 97  | 6 | 0 | 5.726725  | -2.712090 | -1.240477 |
| 98  | 6 | 0 | 1.848785  | 0.956498  | -4.227859 |
| 99  | 6 | 0 | 5.310016  | 2.776222  | -2.986964 |
| 100 | 6 | 0 | 4.509600  | -3.222581 | -0.638440 |
| 101 | 6 | 0 | 2.877588  | 2.980127  | -3.282560 |
| 102 | 6 | 0 | 5.645499  | -0.593091 | -4.107345 |
| 103 | 6 | 0 | 1.717898  | 2.133452  | -3.504370 |
| 104 | 6 | 0 | 4.248654  | 1.381267  | -4.550429 |
| 105 | 6 | 0 | 6.422687  | -1.174399 | -3.028212 |
| 106 | 6 | 0 | 3.263189  | -0.869751 | -4.650542 |
| 107 | 6 | 0 | 5.747380  | -2.380872 | -2.588105 |
| 108 | 6 | 0 | 2.213624  | -0.935337 | 5.330340  |



|     |   |   |           |           |           |
|-----|---|---|-----------|-----------|-----------|
| 109 | 1 | 0 | 2.305773  | -2.017300 | 5.371466  |
| 110 | 6 | 0 | 3.140830  | 0.572976  | -4.762194 |
| 111 | 6 | 0 | 4.488135  | -1.439790 | -4.333051 |
| 112 | 6 | 0 | 6.379129  | -1.849794 | -0.270368 |
| 113 | 6 | 0 | 2.987698  | -0.129927 | 6.131595  |
| 114 | 1 | 0 | 3.695436  | -0.572544 | 6.825157  |
| 115 | 6 | 0 | 4.551427  | -2.544648 | -3.394767 |
| 116 | 6 | 0 | 2.880560  | 1.278771  | 6.050294  |
| 117 | 1 | 0 | 3.507478  | 1.899887  | 6.681978  |
| 118 | 6 | 0 | 4.114051  | 2.611922  | -3.793183 |
| 119 | 6 | 0 | -0.869629 | 6.115088  | 0.218281  |
| 120 | 1 | 0 | -0.925690 | 7.169109  | -0.091741 |
| 121 | 6 | 0 | 0.557253  | -5.945659 | 0.773522  |
| 122 | 1 | 0 | 0.448478  | -5.197195 | -0.024542 |
| 123 | 6 | 0 | 1.812827  | -5.599078 | 1.581844  |
| 124 | 1 | 0 | 1.716481  | -4.638182 | 2.100289  |
| 125 | 1 | 0 | 2.694250  | -5.535154 | 0.929368  |
| 126 | 1 | 0 | 2.015582  | -6.369251 | 2.336700  |
| 127 | 6 | 0 | -2.029471 | -7.461951 | 3.993198  |
| 128 | 1 | 0 | -2.773642 | -6.713466 | 4.289673  |
| 129 | 1 | 0 | -1.793335 | -8.056690 | 4.883887  |
| 130 | 1 | 0 | -2.494378 | -8.128766 | 3.259201  |
| 131 | 6 | 0 | -2.460494 | -5.626492 | -0.578696 |
| 132 | 1 | 0 | -2.441278 | -4.535945 | -0.446956 |
| 133 | 1 | 0 | -3.341729 | -5.871503 | -1.185363 |
| 134 | 1 | 0 | -1.573138 | -5.901514 | -1.157434 |
| 135 | 6 | 0 | -1.624754 | 8.328419  | 2.677152  |
| 136 | 1 | 0 | -0.733603 | 8.400002  | 2.044593  |
| 137 | 1 | 0 | -1.430737 | 8.904141  | 3.590276  |
| 138 | 1 | 0 | -2.446706 | 8.824066  | 2.148551  |
| 139 | 6 | 0 | -0.764341 | -6.790648 | 3.447444  |
| 140 | 1 | 0 | -0.046503 | -7.586066 | 3.192647  |
| 141 | 6 | 0 | -2.526215 | -6.336974 | 0.782413  |
| 142 | 1 | 0 | -2.464984 | -7.422455 | 0.614667  |
| 143 | 6 | 0 | 0.700935  | -7.331890 | 0.130830  |

|     |   |   |           |           |           |
|-----|---|---|-----------|-----------|-----------|
| 144 | 1 | 0 | 0.789009  | -8.113403 | 0.895871  |
| 145 | 1 | 0 | 1.605091  | -7.380899 | -0.487841 |
| 146 | 1 | 0 | -0.152880 | -7.586927 | -0.506027 |
| 147 | 6 | 0 | -1.977297 | 6.874373  | 3.023048  |
| 148 | 1 | 0 | -1.103645 | 6.423475  | 3.517084  |
| 149 | 6 | 0 | -3.154308 | 6.822264  | 4.004515  |
| 150 | 1 | 0 | -4.029977 | 7.334643  | 3.588917  |
| 151 | 1 | 0 | -2.899018 | 7.326169  | 4.944324  |
| 152 | 1 | 0 | -3.449257 | 5.794275  | 4.242998  |
| 153 | 6 | 0 | -0.128525 | -5.908934 | 4.532355  |
| 154 | 1 | 0 | 0.801971  | -5.439487 | 4.197083  |
| 155 | 1 | 0 | 0.097975  | -6.502191 | 5.426530  |
| 156 | 1 | 0 | -0.814447 | -5.106808 | 4.827420  |
| 157 | 6 | 0 | -3.867093 | -6.022357 | 1.458182  |
| 158 | 1 | 0 | -4.025043 | -6.598368 | 2.373115  |
| 159 | 1 | 0 | -4.700695 | -6.242548 | 0.778885  |
| 160 | 1 | 0 | -3.931412 | -4.959653 | 1.724280  |
| 161 | 6 | 0 | -3.963174 | 5.979515  | 0.661828  |
| 162 | 1 | 0 | -3.865176 | 5.399689  | -0.269120 |
| 163 | 6 | 0 | -5.116070 | 5.363081  | 1.464238  |
| 164 | 1 | 0 | -4.904828 | 4.329616  | 1.760879  |
| 165 | 1 | 0 | -6.040083 | 5.361507  | 0.872484  |
| 166 | 1 | 0 | -5.316416 | 5.931199  | 2.378334  |
| 167 | 6 | 0 | 0.495527  | 5.871486  | 0.875626  |
| 168 | 1 | 0 | 0.695684  | 6.582279  | 1.685123  |
| 169 | 1 | 0 | 1.307767  | 5.957456  | 0.141640  |
| 170 | 1 | 0 | 0.547038  | 4.860215  | 1.297670  |
| 171 | 6 | 0 | -1.043060 | 5.234629  | -1.024606 |
| 172 | 1 | 0 | -1.073591 | 4.171935  | -0.751602 |
| 173 | 1 | 0 | -0.202135 | 5.367478  | -1.717148 |
| 174 | 1 | 0 | -1.963236 | 5.470833  | -1.569396 |
| 175 | 6 | 0 | -4.279768 | 7.432265  | 0.280966  |
| 176 | 1 | 0 | -4.447502 | 8.043256  | 1.176262  |
| 177 | 1 | 0 | -5.193256 | 7.486417  | -0.323171 |
| 178 | 1 | 0 | -3.471373 | 7.897691  | -0.294805 |

-----  
 Optimized S0 geometry of **TS2** (at the M06-2X/6-31G(d)/PCM level)  
 -----

| Center<br>Number | Atomic<br>Number | Atomic<br>Type | Coordinates (Angstroms) |           |           |
|------------------|------------------|----------------|-------------------------|-----------|-----------|
|                  |                  |                | X                       | Y         | Z         |
| 1                | 14               | 0              | 1.680106                | 5.825320  | 1.512182  |
| 2                | 14               | 0              | -2.198940               | -5.041512 | 2.691323  |
| 3                | 6                | 0              | -1.763092               | 1.577012  | 1.902277  |
| 4                | 6                | 0              | -4.242131               | 0.648037  | 0.908406  |
| 5                | 6                | 0              | -3.379362               | -0.206711 | 1.578592  |
| 6                | 1                | 0              | -3.654243               | -1.249317 | 1.712810  |
| 7                | 6                | 0              | -6.352852               | 1.116821  | -0.121907 |
| 8                | 6                | 0              | -5.964799               | 2.486579  | -0.306857 |
| 9                | 6                | 0              | -3.844026               | 2.038789  | 0.717101  |
| 10               | 6                | 0              | 0.132894                | 1.333983  | -0.508691 |
| 11               | 6                | 0              | -7.414484               | 0.845673  | -1.009946 |
| 12               | 6                | 0              | -1.201919               | -0.660028 | 2.723230  |
| 13               | 6                | 0              | -5.507054               | 0.145222  | 0.340773  |
| 14               | 6                | 0              | -0.713298               | 0.696068  | -1.392498 |
| 15               | 6                | 0              | -2.160640               | 0.234252  | 2.109582  |
| 16               | 6                | 0              | -0.243017               | -0.100941 | 3.661882  |
| 17               | 6                | 0              | 0.171018                | 1.246995  | 3.434554  |
| 18               | 6                | 0              | -2.607612               | 2.445189  | 1.197724  |
| 19               | 1                | 0              | -2.278789               | 3.469218  | 1.042294  |
| 20               | 6                | 0              | -0.614643               | -1.352626 | -0.035681 |
| 21               | 6                | 0              | -7.694746               | -0.417914 | -1.492725 |
| 22               | 6                | 0              | -6.796237               | 3.035931  | -1.305404 |
| 23               | 6                | 0              | -7.689871               | 2.027071  | -1.741224 |
| 24               | 6                | 0              | -8.258756               | 2.017992  | -2.994937 |
| 25               | 6                | 0              | 0.560336                | 0.713898  | 0.761386  |
| 26               | 6                | 0              | -6.935972               | -1.470172 | -0.869158 |
| 27               | 1                | 0              | -7.115372               | -2.503871 | -1.154203 |
| 28               | 6                | 0              | -5.888666               | -1.199660 | -0.000210 |
| 29               | 1                | 0              | -5.291113               | -2.036712 | 0.351449  |
| 30               | 6                | 0              | 1.984877                | 1.065385  | 0.890365  |

|    |   |   |           |           |           |
|----|---|---|-----------|-----------|-----------|
| 31 | 6 | 0 | -1.102289 | -0.698332 | -1.146442 |
| 32 | 6 | 0 | 0.084841  | 3.244169  | 1.995139  |
| 33 | 6 | 0 | -4.709808 | 2.965159  | -0.039096 |
| 34 | 6 | 0 | 0.173381  | -0.665990 | 1.003268  |
| 35 | 6 | 0 | -1.531952 | -2.045729 | 2.827082  |
| 36 | 6 | 0 | 1.232642  | -1.624848 | 1.368665  |
| 37 | 6 | 0 | 4.254961  | 0.159621  | 0.788463  |
| 38 | 6 | 0 | 0.349517  | -0.845444 | 4.671282  |
| 39 | 1 | 0 | 0.043812  | -1.877514 | 4.826179  |
| 40 | 6 | 0 | 2.924303  | 0.166062  | 1.352265  |
| 41 | 6 | 0 | 0.973212  | -2.889451 | 0.725183  |
| 42 | 6 | 0 | -8.484590 | -0.430684 | -2.706418 |
| 43 | 1 | 0 | -8.806520 | -1.382495 | -3.120674 |
| 44 | 6 | 0 | 2.341392  | 2.004284  | -0.145071 |
| 45 | 6 | 0 | -4.374589 | 4.186819  | -0.722883 |
| 46 | 1 | 0 | -3.414411 | 4.662056  | -0.542040 |
| 47 | 6 | 0 | 1.333485  | -0.281969 | 5.499957  |
| 48 | 6 | 0 | -0.174066 | -2.720340 | -0.144423 |
| 49 | 6 | 0 | -0.422777 | 1.944662  | 2.299996  |
| 50 | 6 | 0 | -8.750634 | 0.723230  | -3.418474 |
| 51 | 1 | 0 | -9.271278 | 0.638009  | -4.368684 |
| 52 | 6 | 0 | -6.420684 | 4.099091  | -2.102954 |
| 53 | 6 | 0 | 1.191345  | 2.174078  | -1.010430 |
| 54 | 6 | 0 | 1.760389  | 1.063479  | 5.262510  |
| 55 | 6 | 0 | 1.178301  | 1.795103  | 4.214687  |
| 56 | 1 | 0 | 1.511107  | 2.811666  | 4.022628  |
| 57 | 6 | 0 | 2.534524  | -1.228251 | 1.599778  |
| 58 | 6 | 0 | -0.524237 | 0.854459  | -2.815584 |
| 59 | 6 | 0 | 4.692606  | -1.220952 | 0.683505  |
| 60 | 6 | 0 | -8.042801 | 3.230310  | -3.758014 |
| 61 | 1 | 0 | -8.509700 | 3.334769  | -4.733929 |
| 62 | 6 | 0 | -5.191711 | 4.731576  | -1.703033 |
| 63 | 1 | 0 | -4.839675 | 5.607392  | -2.241573 |
| 64 | 6 | 0 | 3.630010  | -2.074750 | 1.184211  |
| 65 | 6 | 0 | 5.398858  | 0.646083  | -1.338881 |

|     |   |   |           |           |           |
|-----|---|---|-----------|-----------|-----------|
| 66  | 6 | 0 | -1.150163 | -1.378915 | -2.420119 |
| 67  | 6 | 0 | -0.733703 | -2.703072 | -2.527294 |
| 68  | 6 | 0 | -1.779690 | -3.238950 | 2.833748  |
| 69  | 6 | 0 | 5.458176  | -1.626494 | -0.400258 |
| 70  | 6 | 0 | -0.238469 | -3.392096 | -1.359010 |
| 71  | 6 | 0 | 5.817595  | -0.673234 | -1.436045 |
| 72  | 6 | 0 | 0.645534  | 4.299216  | 1.751631  |
| 73  | 6 | 0 | 0.064277  | -3.121333 | -3.664141 |
| 74  | 6 | 0 | 2.770690  | 1.625106  | 6.098854  |
| 75  | 1 | 0 | 3.092634  | 2.646036  | 5.909491  |
| 76  | 6 | 0 | 1.367007  | 2.350930  | -2.377661 |
| 77  | 6 | 0 | 4.603823  | 1.071747  | -0.202682 |
| 78  | 6 | 0 | 3.623827  | 2.019087  | -0.678301 |
| 79  | 6 | 0 | 0.403582  | -2.206695 | -4.650967 |
| 80  | 6 | 0 | -7.172501 | 4.216670  | -3.334967 |
| 81  | 1 | 0 | -6.983362 | 5.059779  | -3.994153 |
| 82  | 6 | 0 | -0.792059 | -0.422824 | -3.453534 |
| 83  | 6 | 0 | 5.766172  | -1.358989 | -2.712466 |
| 84  | 6 | 0 | 2.019479  | -3.719847 | 0.342750  |
| 85  | 6 | 0 | 5.298669  | -0.697416 | -3.839171 |
| 86  | 6 | 0 | 2.708936  | 2.354527  | -2.938860 |
| 87  | 6 | 0 | 4.419950  | -1.381745 | -4.769603 |
| 88  | 6 | 0 | 3.381845  | -3.301058 | 0.573623  |
| 89  | 6 | 0 | 1.049197  | -4.080131 | -3.194240 |
| 90  | 6 | 0 | -0.036225 | -0.826821 | -4.544518 |
| 91  | 6 | 0 | 3.808834  | 2.191753  | -2.109454 |
| 92  | 6 | 0 | 0.863270  | -4.249314 | -1.765429 |
| 93  | 6 | 0 | 4.908534  | 1.339112  | -2.517712 |
| 94  | 6 | 0 | 5.193032  | -2.902866 | -1.039893 |
| 95  | 6 | 0 | 0.490139  | 1.673089  | -3.303078 |
| 96  | 6 | 0 | 5.381135  | -2.737628 | -2.467228 |
| 97  | 6 | 0 | 3.301854  | -4.407116 | -1.497061 |
| 98  | 6 | 0 | 1.027129  | 0.025158  | -5.047550 |
| 99  | 6 | 0 | 4.858799  | 0.681935  | -3.739419 |
| 100 | 6 | 0 | 1.963402  | -4.410164 | -0.935427 |

|     |   |   |           |           |           |
|-----|---|---|-----------|-----------|-----------|
| 101 | 6 | 0 | 2.655972  | 1.667902  | -4.215061 |
| 102 | 6 | 0 | 4.052148  | -2.699334 | -4.535785 |
| 103 | 6 | 0 | 1.284521  | 1.245934  | -4.438973 |
| 104 | 6 | 0 | 3.435715  | -0.425726 | -5.242701 |
| 105 | 6 | 0 | 4.544562  | -3.393423 | -3.360096 |
| 106 | 6 | 0 | 1.739878  | -2.207307 | -5.212434 |
| 107 | 6 | 0 | 3.480830  | -4.245904 | -2.863837 |
| 108 | 6 | 0 | 1.929706  | -1.015340 | 6.569254  |
| 109 | 1 | 0 | 1.599475  | -2.035411 | 6.746624  |
| 110 | 6 | 0 | 2.124783  | -0.828125 | -5.458320 |
| 111 | 6 | 0 | 2.682518  | -3.122129 | -4.763541 |
| 112 | 6 | 0 | 4.177699  | -3.720382 | -0.563798 |
| 113 | 6 | 0 | 2.893055  | -0.444617 | 7.352629  |
| 114 | 1 | 0 | 3.340949  | -1.009240 | 8.164320  |
| 115 | 6 | 0 | 2.329294  | -4.078164 | -3.731136 |
| 116 | 6 | 0 | 3.320424  | 0.893374  | 7.113327  |
| 117 | 1 | 0 | 4.088815  | 1.328254  | 7.744785  |
| 118 | 6 | 0 | 3.707145  | 0.849614  | -4.606798 |
| 119 | 6 | 0 | 0.997483  | 6.778759  | 0.029653  |
| 120 | 1 | 0 | 1.581773  | 7.707512  | -0.050188 |
| 121 | 6 | 0 | -0.773146 | -5.879806 | 1.764427  |
| 122 | 1 | 0 | -0.588506 | -5.286111 | 0.858046  |
| 123 | 6 | 0 | 0.511772  | -5.895371 | 2.600299  |
| 124 | 1 | 0 | 0.772703  | -4.896079 | 2.968061  |
| 125 | 1 | 0 | 1.358497  | -6.262305 | 2.006824  |
| 126 | 1 | 0 | 0.405334  | -6.558970 | 3.467922  |
| 127 | 6 | 0 | -3.736358 | -5.943366 | 4.986880  |
| 128 | 1 | 0 | -4.195614 | -4.964597 | 5.168583  |
| 129 | 1 | 0 | -3.719063 | -6.476182 | 5.945369  |
| 130 | 1 | 0 | -4.387905 | -6.502446 | 4.306844  |
| 131 | 6 | 0 | -3.446858 | -4.568659 | 0.222941  |
| 132 | 1 | 0 | -3.107836 | -3.523707 | 0.263245  |
| 133 | 1 | 0 | -4.334881 | -4.604731 | -0.420774 |
| 134 | 1 | 0 | -2.655638 | -5.146911 | -0.267374 |
| 135 | 6 | 0 | 4.435391  | 6.332923  | 1.014161  |

|     |   |   |           |           |           |
|-----|---|---|-----------|-----------|-----------|
| 136 | 1 | 0 | 4.107646  | 7.087283  | 0.289727  |
| 137 | 1 | 0 | 5.410927  | 5.956766  | 0.683565  |
| 138 | 1 | 0 | 4.590395  | 6.836012  | 1.976016  |
| 139 | 6 | 0 | -2.313225 | -5.793109 | 4.436703  |
| 140 | 1 | 0 | -1.891300 | -6.804502 | 4.331861  |
| 141 | 6 | 0 | -3.776039 | -5.085923 | 1.632319  |
| 142 | 1 | 0 | -4.089586 | -6.137643 | 1.553606  |
| 143 | 6 | 0 | -1.166444 | -7.300296 | 1.337258  |
| 144 | 1 | 0 | -1.453648 | -7.912184 | 2.201985  |
| 145 | 1 | 0 | -0.325345 | -7.806093 | 0.848001  |
| 146 | 1 | 0 | -2.008484 | -7.299600 | 0.636600  |
| 147 | 6 | 0 | 3.429720  | 5.181859  | 1.155950  |
| 148 | 1 | 0 | 3.332861  | 4.690381  | 0.175646  |
| 149 | 6 | 0 | 3.944702  | 4.122627  | 2.139101  |
| 150 | 1 | 0 | 4.152463  | 4.554586  | 3.123436  |
| 151 | 1 | 0 | 4.879709  | 3.682906  | 1.769762  |
| 152 | 1 | 0 | 3.224108  | 3.308280  | 2.274130  |
| 153 | 6 | 0 | -1.441353 | -5.021969 | 5.439500  |
| 154 | 1 | 0 | -0.406545 | -4.914098 | 5.098105  |
| 155 | 1 | 0 | -1.424348 | -5.534919 | 6.408751  |
| 156 | 1 | 0 | -1.841967 | -4.014588 | 5.600459  |
| 157 | 6 | 0 | -4.935802 | -4.273039 | 2.220294  |
| 158 | 1 | 0 | -5.302914 | -4.683945 | 3.163594  |
| 159 | 1 | 0 | -5.780044 | -4.244723 | 1.519298  |
| 160 | 1 | 0 | -4.631621 | -3.235811 | 2.411441  |
| 161 | 6 | 0 | 1.486920  | 6.873388  | 3.082009  |
| 162 | 1 | 0 | 0.409742  | 6.844682  | 3.303408  |
| 163 | 6 | 0 | 2.231768  | 6.286651  | 4.284551  |
| 164 | 1 | 0 | 1.946877  | 5.245676  | 4.479007  |
| 165 | 1 | 0 | 2.024940  | 6.866409  | 5.192110  |
| 166 | 1 | 0 | 3.314976  | 6.313700  | 4.118489  |
| 167 | 6 | 0 | 1.151015  | 5.993859  | -1.278266 |
| 168 | 1 | 0 | 2.195994  | 5.748401  | -1.496019 |
| 169 | 1 | 0 | 0.760484  | 6.568792  | -2.126515 |
| 170 | 1 | 0 | 0.593272  | 5.050158  | -1.233725 |

|     |   |   |           |          |           |
|-----|---|---|-----------|----------|-----------|
| 171 | 6 | 0 | -0.467664 | 7.163746 | 0.272142  |
| 172 | 1 | 0 | -1.090729 | 6.267975 | 0.376410  |
| 173 | 1 | 0 | -0.864501 | 7.749558 | -0.565485 |
| 174 | 1 | 0 | -0.590871 | 7.757965 | 1.184989  |
| 175 | 6 | 0 | 1.885841  | 8.340017 | 2.867843  |
| 176 | 1 | 0 | 2.956630  | 8.437209 | 2.652557  |
| 177 | 1 | 0 | 1.681709  | 8.927006 | 3.771549  |
| 178 | 1 | 0 | 1.335884  | 8.801530 | 2.040724  |

-----  
 Optimized S0 geometry of **CORA-monPA-C<sub>60</sub>** (at the M06-2X/6-31G(d)/PCM level)

| Center<br>Number | Atomic<br>Number | Atomic<br>Type | Coordinates (Angstroms) |           |           |
|------------------|------------------|----------------|-------------------------|-----------|-----------|
|                  |                  |                | X                       | Y         | Z         |
| 1                | 14               | 0              | -2.191662               | 5.890207  | 1.557020  |
| 2                | 14               | 0              | -2.105629               | -5.968908 | 1.640890  |
| 3                | 6                | 0              | -3.222016               | 0.667927  | 0.887403  |
| 4                | 6                | 0              | -5.466859               | -0.794180 | -0.100389 |
| 5                | 6                | 0              | -4.342634               | -1.444994 | 0.390216  |
| 6                | 1                | 0              | -4.320752               | -2.529752 | 0.395486  |
| 7                | 6                | 0              | -7.724545               | -0.785346 | -0.918801 |
| 8                | 6                | 0              | -7.733256               | 0.648298  | -0.913396 |
| 9                | 6                | 0              | -5.475926               | 0.676383  | -0.096542 |
| 10               | 6                | 0              | 1.315475                | 1.427850  | 0.011942  |
| 11               | 6                | 0              | -8.775462               | -1.218410 | -1.756099 |
| 12               | 6                | 0              | -2.058168               | -1.474329 | 1.388649  |
| 13               | 6                | 0              | -6.609562               | -1.547631 | -0.659072 |
| 14               | 6                | 0              | 0.944821                | 0.734801  | -1.118324 |
| 15               | 6                | 0              | -3.213418               | -0.763668 | 0.887529  |
| 16               | 6                | 0              | -0.967587               | -0.741616 | 1.839566  |
| 17               | 6                | 0              | -0.977889               | 0.675528  | 1.840370  |
| 18               | 6                | 0              | -4.359256               | 1.338137  | 0.394692  |
| 19               | 1                | 0              | -4.351051               | 2.423028  | 0.407218  |
| 20               | 6                | 0              | 1.340921                | -1.438975 | 0.003011  |
| 21               | 6                | 0              | -8.783369               | -2.446442 | -2.401861 |
| 22               | 6                | 0              | -8.789177               | 1.075669  | -1.747172 |



|    |   |   |            |           |           |
|----|---|---|------------|-----------|-----------|
| 23 | 6 | 0 | -9.431552  | -0.073217 | -2.268563 |
| 24 | 6 | 0 | -10.138795 | -0.072715 | -3.458097 |
| 25 | 6 | 0 | 1.484102   | 0.797722  | 1.401923  |
| 26 | 6 | 0 | -7.718693  | -3.327529 | -1.993073 |
| 27 | 1 | 0 | -7.662612  | -4.332329 | -2.405092 |
| 28 | 6 | 0 | -6.681339  | -2.895844 | -1.166621 |
| 29 | 1 | 0 | -5.866482  | -3.589160 | -0.977594 |
| 30 | 6 | 0 | 2.817224   | 1.437019  | 1.817659  |
| 31 | 6 | 0 | 0.958306   | -0.745201 | -1.123046 |
| 32 | 6 | 0 | -2.086366  | 2.818200  | 1.418504  |
| 33 | 6 | 0 | -6.626981  | 1.421091  | -0.648768 |
| 34 | 6 | 0 | 1.498040   | -0.814845 | 1.397353  |
| 35 | 6 | 0 | -2.054177  | -2.899654 | 1.437134  |
| 36 | 6 | 0 | 2.843311   | -1.431691 | 1.808506  |
| 37 | 6 | 0 | 5.226696   | 1.199874  | 2.189759  |
| 38 | 6 | 0 | 0.331730   | -1.315823 | 2.367300  |
| 39 | 1 | 0 | 0.320200   | -2.406723 | 2.378202  |
| 40 | 6 | 0 | 3.866191   | 0.750821  | 2.387649  |
| 41 | 6 | 0 | 3.141333   | -2.568968 | 0.980369  |
| 42 | 6 | 0 | -9.687248  | -2.515168 | -3.532376 |
| 43 | 1 | 0 | -9.806788  | -3.456592 | -4.063580 |
| 44 | 6 | 0 | 3.093957   | 2.585051  | 0.997044  |
| 45 | 6 | 0 | -6.713404  | 2.772321  | -1.146076 |
| 46 | 1 | 0 | -5.904686  | 3.472221  | -0.953455 |
| 47 | 6 | 0 | 0.582856   | -0.723994 | 3.738327  |
| 48 | 6 | 0 | 2.212659   | -2.573512 | -0.134659 |
| 49 | 6 | 0 | -2.075877  | 1.392995  | 1.385869  |
| 50 | 6 | 0 | -10.329643 | -1.389282 | -4.033638 |
| 51 | 1 | 0 | -10.926437 | -1.495414 | -4.936586 |
| 52 | 6 | 0 | -8.811042  | 2.308434  | -2.383582 |
| 53 | 6 | 0 | 2.165288   | 2.579792  | -0.117879 |
| 54 | 6 | 0 | 0.568956   | 0.678830  | 3.741284  |
| 55 | 6 | 0 | 0.308764   | 1.271381  | 2.372795  |
| 56 | 1 | 0 | 0.275860   | 2.361843  | 2.388660  |
| 57 | 6 | 0 | 3.879678   | -0.729864 | 2.382765  |

|    |   |   |            |           |           |
|----|---|---|------------|-----------|-----------|
| 58 | 6 | 0 | 1.380893   | 1.179261  | -2.423427 |
| 59 | 6 | 0 | 6.079579   | 0.031892  | 2.063279  |
| 60 | 6 | 0 | -10.345491 | 1.246057  | -4.023071 |
| 61 | 1 | 0 | -10.944258 | 1.352300  | -4.924699 |
| 62 | 6 | 0 | -7.755995  | 3.198434  | -1.968851 |
| 63 | 1 | 0 | -7.711481  | 4.206622  | -2.373983 |
| 64 | 6 | 0 | 5.248264   | -1.152354 | 2.181948  |
| 65 | 6 | 0 | 6.613755   | 2.352838  | 0.502252  |
| 66 | 6 | 0 | 1.402468   | -1.172915 | -2.431026 |
| 67 | 6 | 0 | 2.215907   | -2.302634 | -2.572117 |
| 68 | 6 | 0 | -2.065514  | -4.121900 | 1.503494  |
| 69 | 6 | 0 | 7.163644   | 0.044707  | 1.185555  |
| 70 | 6 | 0 | 2.631188   | -3.021750 | -1.393015 |
| 71 | 6 | 0 | 7.431660   | 1.227192  | 0.382285  |
| 72 | 6 | 0 | -2.112457  | 4.041058  | 1.460452  |
| 73 | 6 | 0 | 3.326923   | -2.286777 | -3.505801 |
| 74 | 6 | 0 | 0.788081   | 1.383871  | 4.922112  |
| 75 | 1 | 0 | 0.778082   | 2.470938  | 4.922953  |
| 76 | 6 | 0 | 2.575279   | 3.043922  | -1.373267 |
| 77 | 6 | 0 | 5.495846   | 2.342630  | 1.427932  |
| 78 | 6 | 0 | 4.400323   | 3.053495  | 0.816146  |
| 79 | 6 | 0 | 3.575841   | -1.148194 | -4.275510 |
| 80 | 6 | 0 | -9.716061  | 2.375447  | -3.513302 |
| 81 | 1 | 0 | -9.846863  | 3.319533  | -4.037087 |
| 82 | 6 | 0 | 1.662922   | 0.008308  | -3.233793 |
| 83 | 6 | 0 | 7.873736   | 0.786096  | -0.926132 |
| 84 | 6 | 0 | 4.456164   | -3.011759 | 0.796255  |
| 85 | 6 | 0 | 7.479039   | 1.484170  | -2.069708 |
| 86 | 6 | 0 | 3.939021   | 3.511649  | -1.564434 |
| 87 | 6 | 0 | 7.076439   | 0.756260  | -3.261192 |
| 88 | 6 | 0 | 5.538411   | -2.284918 | 1.412756  |
| 89 | 6 | 0 | 4.434561   | -3.005626 | -2.896466 |
| 90 | 6 | 0 | 2.721108   | 0.021011  | -4.142333 |
| 91 | 6 | 0 | 4.831562   | 3.516333  | -0.493596 |
| 92 | 6 | 0 | 4.003217   | -3.462953 | -1.587100 |

|     |   |   |           |           |           |
|-----|---|---|-----------|-----------|-----------|
| 93  | 6 | 0 | 6.203540  | 3.080841  | -0.688070 |
| 94  | 6 | 0 | 7.453276  | -1.127347 | 0.374558  |
| 95  | 6 | 0 | 2.173201  | 2.324760  | -2.557059 |
| 96  | 6 | 0 | 7.887193  | -0.669727 | -0.930893 |
| 97  | 6 | 0 | 6.259474  | -2.996291 | -0.707848 |
| 98  | 6 | 0 | 3.554105  | 1.206586  | -4.267763 |
| 99  | 6 | 0 | 6.627074  | 2.653678  | -1.948213 |
| 100 | 6 | 0 | 4.895744  | -3.458227 | -0.516263 |
| 101 | 6 | 0 | 4.378533  | 3.070571  | -2.876577 |
| 102 | 6 | 0 | 7.089331  | -0.639520 | -3.265760 |
| 103 | 6 | 0 | 3.284309  | 2.335329  | -3.490619 |
| 104 | 6 | 0 | 5.973723  | 1.476012  | -3.875570 |
| 105 | 6 | 0 | 7.505384  | -1.367561 | -2.078967 |
| 106 | 6 | 0 | 4.935962  | -0.685492 | -4.469689 |
| 107 | 6 | 0 | 6.675215  | -2.553475 | -1.965176 |
| 108 | 6 | 0 | 0.818088  | -1.428714 | 4.916338  |
| 109 | 1 | 0 | 0.832336  | -2.515656 | 4.912967  |
| 110 | 6 | 0 | 4.922543  | 0.770391  | -4.464988 |
| 111 | 6 | 0 | 6.000006  | -1.375413 | -3.884786 |
| 112 | 6 | 0 | 6.656335  | -2.268658 | 0.487170  |
| 113 | 6 | 0 | 1.030156  | -0.720998 | 6.104799  |
| 114 | 1 | 0 | 1.206524  | -1.262678 | 7.029959  |
| 115 | 6 | 0 | 5.744050  | -2.558314 | -3.082063 |
| 116 | 6 | 0 | 1.014840  | 0.676158  | 6.107831  |
| 117 | 1 | 0 | 1.179020  | 1.217635  | 7.035344  |
| 118 | 6 | 0 | 5.696060  | 2.648836  | -3.065198 |
| 119 | 6 | 0 | -1.331618 | 6.601217  | -0.000904 |
| 120 | 1 | 0 | -1.413649 | 7.695735  | 0.088657  |
| 121 | 6 | 0 | -0.998173 | -6.688862 | 0.249578  |
| 122 | 1 | 0 | -1.460132 | -6.337850 | -0.685120 |
| 123 | 6 | 0 | 0.452185  | -6.172728 | 0.263604  |
| 124 | 1 | 0 | 0.500920  | -5.078514 | 0.261811  |
| 125 | 1 | 0 | 0.998283  | -6.529689 | -0.620309 |
| 126 | 1 | 0 | 0.998433  | -6.532207 | 1.144256  |
| 127 | 6 | 0 | -2.476271 | -6.633894 | 4.474279  |

|     |   |   |           |           |           |
|-----|---|---|-----------|-----------|-----------|
| 128 | 1 | 0 | -2.936419 | -5.669677 | 4.722375  |
| 129 | 1 | 0 | -2.011709 | -7.015365 | 5.393846  |
| 130 | 1 | 0 | -3.278015 | -7.327663 | 4.199375  |
| 131 | 6 | 0 | -4.311780 | -6.537233 | -0.131068 |
| 132 | 1 | 0 | -4.226175 | -5.536355 | -0.574332 |
| 133 | 1 | 0 | -5.355200 | -6.858074 | -0.253211 |
| 134 | 1 | 0 | -3.688975 | -7.213967 | -0.724998 |
| 135 | 6 | 0 | -1.111718 | 7.921869  | 3.324498  |
| 136 | 1 | 0 | -0.746493 | 8.440610  | 2.430449  |
| 137 | 1 | 0 | -0.423521 | 8.160866  | 4.146494  |
| 138 | 1 | 0 | -2.085484 | 8.353830  | 3.583927  |
| 139 | 6 | 0 | -1.419850 | -6.487203 | 3.363012  |
| 140 | 1 | 0 | -0.995330 | -7.488593 | 3.188603  |
| 141 | 6 | 0 | -3.922609 | -6.526501 | 1.361172  |
| 142 | 1 | 0 | -3.971780 | -7.564705 | 1.726203  |
| 143 | 6 | 0 | -1.018823 | -8.231109 | 0.231943  |
| 144 | 1 | 0 | -0.554643 | -8.648747 | 1.134254  |
| 145 | 1 | 0 | -0.452964 | -8.615359 | -0.627423 |
| 146 | 1 | 0 | -2.034041 | -8.639046 | 0.164124  |
| 147 | 6 | 0 | -1.205092 | 6.396290  | 3.122885  |
| 148 | 1 | 0 | -0.188115 | 6.034618  | 2.903885  |
| 149 | 6 | 0 | -1.656079 | 5.698578  | 4.419943  |
| 150 | 1 | 0 | -2.646169 | 6.041406  | 4.741376  |
| 151 | 1 | 0 | -0.956713 | 5.918369  | 5.238243  |
| 152 | 1 | 0 | -1.703778 | 4.610116  | 4.304357  |
| 153 | 6 | 0 | -0.273167 | -5.578367 | 3.850817  |
| 154 | 1 | 0 | 0.537675  | -5.491068 | 3.119958  |
| 155 | 1 | 0 | 0.160689  | -5.971764 | 4.780344  |
| 156 | 1 | 0 | -0.639938 | -4.566232 | 4.059703  |
| 157 | 6 | 0 | -4.950236 | -5.698308 | 2.158045  |
| 158 | 1 | 0 | -4.759110 | -5.710004 | 3.234872  |
| 159 | 1 | 0 | -5.964636 | -6.088011 | 1.997441  |
| 160 | 1 | 0 | -4.947273 | -4.650304 | 1.836044  |
| 161 | 6 | 0 | -4.055754 | 6.345724  | 1.522580  |
| 162 | 1 | 0 | -4.414558 | 5.871915  | 0.594994  |

|     |   |   |           |          |           |
|-----|---|---|-----------|----------|-----------|
| 163 | 6 | 0 | -4.875892 | 5.744865 | 2.680100  |
| 164 | 1 | 0 | -4.709519 | 4.667059 | 2.786487  |
| 165 | 1 | 0 | -5.950368 | 5.901615 | 2.514100  |
| 166 | 1 | 0 | -4.625397 | 6.216702 | 3.637360  |
| 167 | 6 | 0 | 0.167509  | 6.252358 | -0.067287 |
| 168 | 1 | 0 | 0.719922  | 6.621492 | 0.804302  |
| 169 | 1 | 0 | 0.629187  | 6.696066 | -0.959847 |
| 170 | 1 | 0 | 0.323622  | 5.168371 | -0.126068 |
| 171 | 6 | 0 | -2.041158 | 6.184991 | -1.303902 |
| 172 | 1 | 0 | -2.019803 | 5.096296 | -1.437491 |
| 173 | 1 | 0 | -1.544564 | 6.631377 | -2.175993 |
| 174 | 1 | 0 | -3.089989 | 6.502071 | -1.325487 |
| 175 | 6 | 0 | -4.320351 | 7.859059 | 1.393894  |
| 176 | 1 | 0 | -4.000046 | 8.400714 | 2.291532  |
| 177 | 1 | 0 | -5.393935 | 8.052673 | 1.265513  |
| 178 | 1 | 0 | -3.802729 | 8.303814 | 0.536194  |

-----  
Optimized S0 geometry of **CORA-monPA-C<sub>60</sub>-3** (at the M06-2X/6-31G(d)/PCM level)

| Center Number | Atomic Number | Atomic Type | Coordinates (Angstroms) |           |           |
|---------------|---------------|-------------|-------------------------|-----------|-----------|
|               |               |             | X                       | Y         | Z         |
| 1             | 14            | 0           | -2.356657               | -5.534566 | -1.423335 |
| 2             | 14            | 0           | 0.202984                | 5.816267  | -1.704952 |
| 3             | 6             | 0           | -2.278620               | -0.364805 | -1.169384 |
| 4             | 6             | 0           | -4.126470               | 1.412839  | -0.020755 |
| 5             | 6             | 0           | -2.951734               | 1.887468  | -0.627965 |
| 6             | 1             | 0           | -2.751389               | 2.955375  | -0.653499 |
| 7             | 6             | 0           | -6.259892               | 1.787137  | 0.998168  |
| 8             | 6             | 0           | -6.504055               | 0.377223  | 1.014017  |
| 9             | 6             | 0           | -4.368770               | -0.009151 | 0.003529  |
| 10            | 6             | 0           | -0.015555               | -1.409118 | 0.518118  |
| 11            | 6             | 0           | -7.126474               | 2.385460  | 1.938655  |
| 12            | 6             | 0           | -0.735391               | 1.407658  | -1.858436 |
| 13            | 6             | 0           | -5.064060               | 2.344146  | 0.627932  |

|    |   |   |           |           |           |
|----|---|---|-----------|-----------|-----------|
| 14 | 6 | 0 | -0.204943 | -0.648319 | 1.641321  |
| 15 | 6 | 0 | -2.051528 | 1.018058  | -1.207808 |
| 16 | 6 | 0 | -0.639074 | 0.732566  | -3.215876 |
| 17 | 6 | 0 | -0.864394 | -0.668881 | -3.171182 |
| 18 | 6 | 0 | -3.412671 | -0.867059 | -0.565597 |
| 19 | 1 | 0 | -3.570754 | -1.942035 | -0.537764 |
| 20 | 6 | 0 | 0.440752  | 1.401463  | 0.426761  |
| 21 | 6 | 0 | -6.845393 | 3.578659  | 2.573164  |
| 22 | 6 | 0 | -7.519657 | 0.125861  | 1.962480  |
| 23 | 6 | 0 | -7.905341 | 1.363134  | 2.533609  |
| 24 | 6 | 0 | -8.446876 | 1.470798  | 3.795466  |
| 25 | 6 | 0 | 0.151459  | -0.850458 | -0.895625 |
| 26 | 6 | 0 | -5.690848 | 4.266577  | 2.053952  |
| 27 | 1 | 0 | -5.416785 | 5.236874  | 2.460164  |
| 28 | 6 | 0 | -4.840605 | 3.675554  | 1.131427  |
| 29 | 1 | 0 | -3.934117 | 4.210667  | 0.861535  |
| 30 | 6 | 0 | 1.334280  | -1.690741 | -1.377922 |
| 31 | 6 | 0 | 0.031772  | 0.812942  | 1.593773  |
| 32 | 6 | 0 | -1.451214 | -2.620479 | -1.741925 |
| 33 | 6 | 0 | -5.564642 | -0.557060 | 0.664835  |
| 34 | 6 | 0 | 0.408729  | 0.728193  | -0.946197 |
| 35 | 6 | 0 | -0.529328 | 2.850381  | -1.920596 |
| 36 | 6 | 0 | 1.791096  | 1.120593  | -1.467802 |
| 37 | 6 | 0 | 3.707382  | -1.840282 | -1.920724 |
| 38 | 6 | 0 | -0.316734 | 1.350905  | -4.392091 |
| 39 | 1 | 0 | -0.133228 | 2.422512  | -4.417854 |
| 40 | 6 | 0 | 2.422502  | -1.194837 | -2.045855 |
| 41 | 6 | 0 | 2.313855  | 2.216445  | -0.703942 |
| 42 | 6 | 0 | -7.583181 | 3.790675  | 3.801044  |
| 43 | 1 | 0 | -7.470799 | 4.732009  | 4.332556  |
| 44 | 6 | 0 | 1.491254  | -2.845406 | -0.541297 |
| 45 | 6 | 0 | -5.803495 | -1.875953 | 1.194315  |
| 46 | 1 | 0 | -5.131415 | -2.691083 | 0.938132  |
| 47 | 6 | 0 | -0.218994 | 0.592066  | -5.590352 |
| 48 | 6 | 0 | 1.478577  | 2.391709  | 0.466727  |

|    |   |   |           |           |           |
|----|---|---|-----------|-----------|-----------|
| 49 | 6 | 0 | -1.154104 | -1.191548 | -1.774500 |
| 50 | 6 | 0 | -8.341670 | 2.791364  | 4.380261  |
| 51 | 1 | 0 | -8.799372 | 2.981109  | 5.347594  |
| 52 | 6 | 0 | -7.655849 | -1.078720 | 2.622657  |
| 53 | 6 | 0 | 0.658116  | -2.670247 | 0.631428  |
| 54 | 6 | 0 | -0.443931 | -0.813262 | -5.545408 |
| 55 | 6 | 0 | -0.763267 | -1.427875 | -4.303793 |
| 56 | 1 | 0 | -0.926487 | -2.502074 | -4.262715 |
| 57 | 6 | 0 | 2.659419  | 0.265832  | -2.093717 |
| 58 | 6 | 0 | 0.252501  | -1.121999 | 2.925360  |
| 59 | 6 | 0 | 4.732568  | -0.814298 | -1.891784 |
| 60 | 6 | 0 | -8.792908 | 0.204633  | 4.407157  |
| 61 | 1 | 0 | -9.285901 | 0.199684  | 5.375868  |
| 62 | 6 | 0 | -6.802560 | -2.126479 | 2.122851  |
| 63 | 1 | 0 | -6.874263 | -3.123794 | 2.548692  |
| 64 | 6 | 0 | 4.083678  | 0.478916  | -1.996624 |
| 65 | 6 | 0 | 5.018056  | -3.143477 | -0.293269 |
| 66 | 6 | 0 | 0.629030  | 1.198621  | 2.850047  |
| 67 | 6 | 0 | 1.607692  | 2.187457  | 2.896026  |
| 68 | 6 | 0 | -0.303128 | 4.044220  | -1.929166 |
| 69 | 6 | 0 | 5.853754  | -0.970322 | -1.091051 |
| 70 | 6 | 0 | 2.041664  | 2.803994  | 1.669783  |
| 71 | 6 | 0 | 5.996271  | -2.158894 | -0.267690 |
| 72 | 6 | 0 | -1.751891 | -3.796621 | -1.678885 |
| 73 | 6 | 0 | 2.767538  | 2.022892  | 3.751170  |
| 74 | 6 | 0 | -0.339502 | -1.565802 | -6.744239 |
| 75 | 1 | 0 | -0.512694 | -2.638048 | -6.703713 |
| 76 | 6 | 0 | 1.074672  | -3.162005 | 1.863629  |
| 77 | 6 | 0 | 3.853031  | -2.984757 | -1.142369 |
| 78 | 6 | 0 | 2.711823  | -3.503576 | -0.435461 |
| 79 | 6 | 0 | 2.894618  | 0.884787  | 4.535669  |
| 80 | 6 | 0 | -8.418910 | -1.003862 | 3.851083  |
| 81 | 1 | 0 | -8.630770 | -1.916362 | 4.402159  |
| 82 | 6 | 0 | 0.765360  | 0.011097  | 3.672341  |
| 83 | 6 | 0 | 6.590880  | -1.759118 | 0.990643  |

|     |   |   |           |           |           |
|-----|---|---|-----------|-----------|-----------|
| 84  | 6 | 0 | 3.680408  | 2.459955  | -0.627231 |
| 85  | 6 | 0 | 6.181436  | -2.357931 | 2.174499  |
| 86  | 6 | 0 | 2.360568  | -3.829376 | 1.978113  |
| 87  | 6 | 0 | 5.979107  | -1.548708 | 3.362263  |
| 88  | 6 | 0 | 4.591839  | 1.565265  | -1.290144 |
| 89  | 6 | 0 | 3.923313  | 2.549592  | 3.046546  |
| 90  | 6 | 0 | 1.866714  | -0.141074 | 4.501027  |
| 91  | 6 | 0 | 3.158837  | -3.995598 | 0.857371  |
| 92  | 6 | 0 | 3.474441  | 3.035278  | 1.755773  |
| 93  | 6 | 0 | 4.588790  | -3.770073 | 0.944534  |
| 94  | 6 | 0 | 6.372928  | 0.161674  | -0.343226 |
| 95  | 6 | 0 | 0.869880  | -2.364281 | 3.043475  |
| 96  | 6 | 0 | 6.823508  | -0.324991 | 0.944036  |
| 97  | 6 | 0 | 5.559834  | 2.208974  | 0.750239  |
| 98  | 6 | 0 | 2.518399  | -1.434863 | 4.611496  |
| 99  | 6 | 0 | 5.157787  | -3.385291 | 2.151476  |
| 100 | 6 | 0 | 4.273458  | 2.869274  | 0.635047  |
| 101 | 6 | 0 | 2.952717  | -3.429666 | 3.240604  |
| 102 | 6 | 0 | 6.201917  | -0.180025 | 3.318246  |
| 103 | 6 | 0 | 2.030110  | -2.521429 | 3.899055  |
| 104 | 6 | 0 | 4.828774  | -2.075864 | 4.072246  |
| 105 | 6 | 0 | 6.636679  | 0.446064  | 2.083175  |
| 106 | 6 | 0 | 4.178411  | 0.225128  | 4.655000  |
| 107 | 6 | 0 | 5.990362  | 1.740833  | 1.984716  |
| 108 | 6 | 0 | 0.102210  | 1.199426  | -6.832208 |
| 109 | 1 | 0 | 0.272023  | 2.272771  | -6.858760 |
| 110 | 6 | 0 | 3.946016  | -1.208654 | 4.702338  |
| 111 | 6 | 0 | 5.283628  | 0.727574  | 3.981261  |
| 112 | 6 | 0 | 5.755661  | 1.401380  | -0.440997 |
| 113 | 6 | 0 | 0.197237  | 0.446206  | -7.975189 |
| 114 | 1 | 0 | 0.443440  | 0.919811  | -8.920432 |
| 115 | 6 | 0 | 5.153533  | 1.914501  | 3.158385  |
| 116 | 6 | 0 | -0.025917 | -0.951733 | -7.930631 |
| 117 | 1 | 0 | 0.051309  | -1.535985 | -8.842278 |
| 118 | 6 | 0 | 4.321078  | -3.210342 | 3.325165  |



|     |   |   |           |           |           |
|-----|---|---|-----------|-----------|-----------|
| 119 | 6 | 0 | -1.681374 | -6.068980 | 0.266506  |
| 120 | 1 | 0 | -2.109858 | -7.056995 | 0.493436  |
| 121 | 6 | 0 | 2.034179  | 5.780984  | -1.206511 |
| 122 | 1 | 0 | 2.122007  | 5.053499  | -0.386062 |
| 123 | 6 | 0 | 2.931101  | 5.312379  | -2.357971 |
| 124 | 1 | 0 | 2.615877  | 4.338694  | -2.750678 |
| 125 | 1 | 0 | 3.972159  | 5.215069  | -2.024880 |
| 126 | 1 | 0 | 2.915974  | 6.032988  | -3.185476 |
| 127 | 6 | 0 | -1.246361 | 7.589936  | -3.490886 |
| 128 | 1 | 0 | -2.140548 | 6.956363  | -3.499701 |
| 129 | 1 | 0 | -1.235122 | 8.149752  | -4.433919 |
| 130 | 1 | 0 | -1.352400 | 8.312553  | -2.674872 |
| 131 | 6 | 0 | -0.486610 | 5.657974  | 1.011233  |
| 132 | 1 | 0 | -0.711373 | 4.590571  | 0.880127  |
| 133 | 1 | 0 | -1.068967 | 6.015280  | 1.869070  |
| 134 | 1 | 0 | 0.574971  | 5.741175  | 1.268832  |
| 135 | 6 | 0 | -1.747997 | -8.114990 | -2.510129 |
| 136 | 1 | 0 | -1.318760 | -8.386151 | -1.539481 |
| 137 | 1 | 0 | -1.225640 | -8.697000 | -3.278876 |
| 138 | 1 | 0 | -2.794199 | -8.439092 | -2.512085 |
| 139 | 6 | 0 | 0.025015  | 6.745160  | -3.356612 |
| 140 | 1 | 0 | 0.885811  | 7.431073  | -3.382462 |
| 141 | 6 | 0 | -0.851959 | 6.446388  | -0.257028 |
| 142 | 1 | 0 | -0.600457 | 7.505081  | -0.095566 |
| 143 | 6 | 0 | 2.487368  | 7.151340  | -0.685022 |
| 144 | 1 | 0 | 2.372754  | 7.926843  | -1.453018 |
| 145 | 1 | 0 | 3.546901  | 7.128851  | -0.403075 |
| 146 | 1 | 0 | 1.915617  | 7.467192  | 0.194681  |
| 147 | 6 | 0 | -1.627603 | -6.612072 | -2.799909 |
| 148 | 1 | 0 | -0.557470 | -6.355384 | -2.808513 |
| 149 | 6 | 0 | -2.205152 | -6.276470 | -4.180034 |
| 150 | 1 | 0 | -3.260695 | -6.566619 | -4.241399 |
| 151 | 1 | 0 | -1.671570 | -6.819321 | -4.969311 |
| 152 | 1 | 0 | -2.140076 | -5.205530 | -4.404879 |
| 153 | 6 | 0 | 0.147322  | 5.786980  | -4.550936 |

|     |   |   |           |           |           |
|-----|---|---|-----------|-----------|-----------|
| 154 | 1 | 0 | 1.056153  | 5.177454  | -4.507925 |
| 155 | 1 | 0 | 0.159950  | 6.345913  | -5.494460 |
| 156 | 1 | 0 | -0.707911 | 5.101810  | -4.578917 |
| 157 | 6 | 0 | -2.360877 | 6.336367  | -0.511585 |
| 158 | 1 | 0 | -2.708019 | 7.015557  | -1.293230 |
| 159 | 1 | 0 | -2.922881 | 6.568479  | 0.402418  |
| 160 | 1 | 0 | -2.631699 | 5.317375  | -0.816406 |
| 161 | 6 | 0 | -4.251876 | -5.416658 | -1.389727 |
| 162 | 1 | 0 | -4.474395 | -4.956110 | -0.414864 |
| 163 | 6 | 0 | -4.845817 | -4.506275 | -2.472101 |
| 164 | 1 | 0 | -4.400439 | -3.506239 | -2.453645 |
| 165 | 1 | 0 | -5.928155 | -4.398244 | -2.331037 |
| 166 | 1 | 0 | -4.686798 | -4.921718 | -3.473185 |
| 167 | 6 | 0 | -0.153082 | -6.205257 | 0.212877  |
| 168 | 1 | 0 | 0.166765  | -6.995967 | -0.474180 |
| 169 | 1 | 0 | 0.254880  | -6.437015 | 1.204688  |
| 170 | 1 | 0 | 0.312301  | -5.270473 | -0.121858 |
| 171 | 6 | 0 | -2.107323 | -5.093557 | 1.372227  |
| 172 | 1 | 0 | -1.805738 | -4.066464 | 1.131540  |
| 173 | 1 | 0 | -1.636246 | -5.357701 | 2.327234  |
| 174 | 1 | 0 | -3.191825 | -5.097352 | 1.525258  |
| 175 | 6 | 0 | -4.915094 | -6.800336 | -1.416571 |
| 176 | 1 | 0 | -4.783536 | -7.275902 | -2.395779 |
| 177 | 1 | 0 | -5.993945 | -6.717046 | -1.239354 |
| 178 | 1 | 0 | -4.503957 | -7.476790 | -0.658205 |

---

## 8 NMR and Mass Spectra

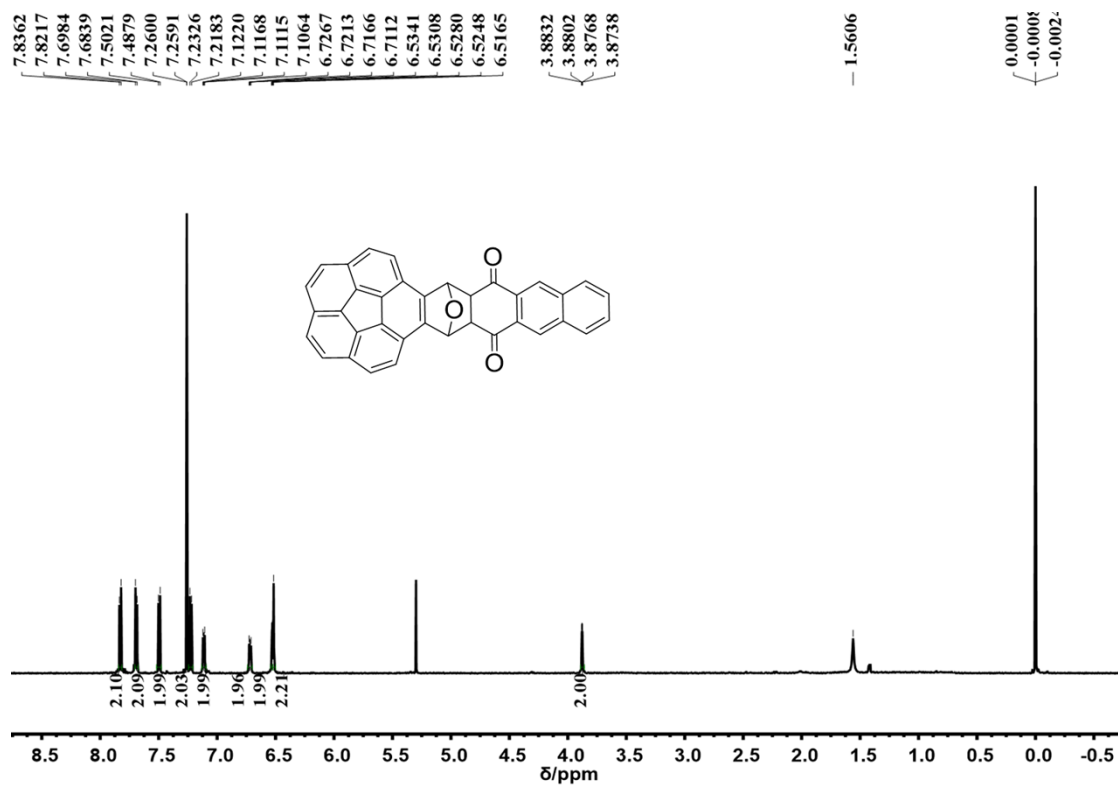

Figure S20. <sup>1</sup>H NMR spectrum (600 MHz, CDCl<sub>3</sub>, 298 K) of 3.

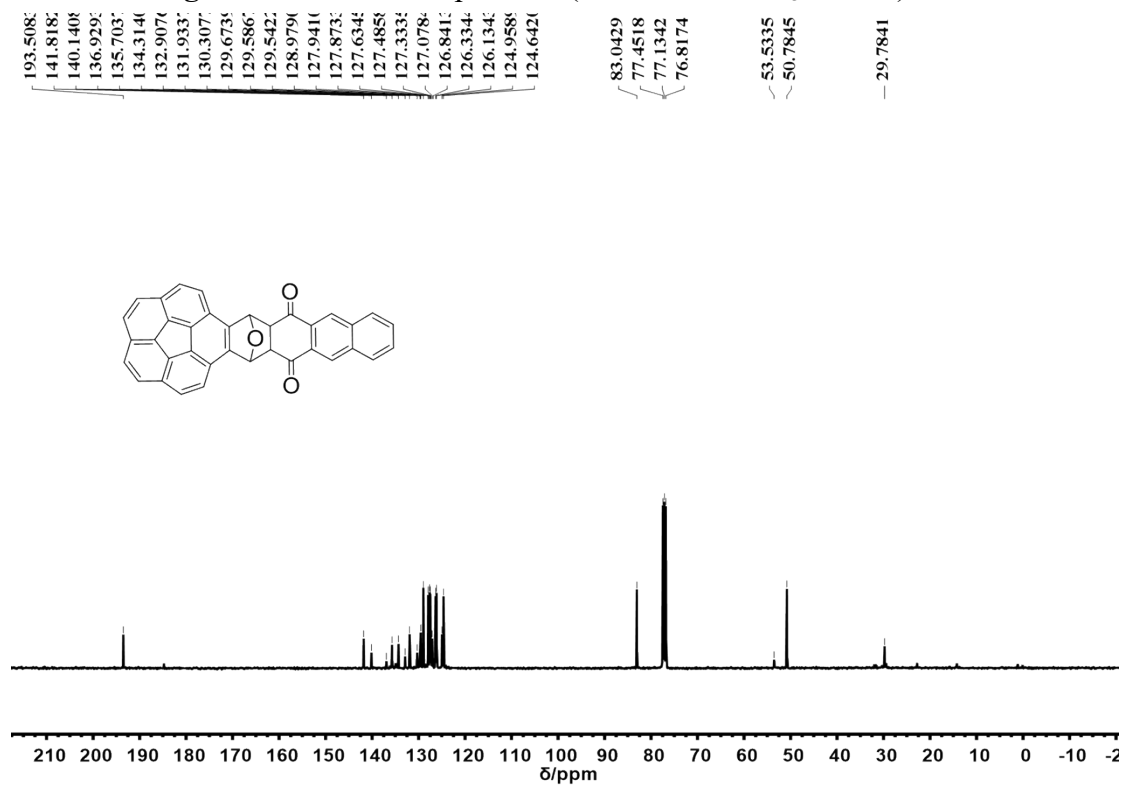

Figure S21. <sup>13</sup>C NMR spectrum (100 MHz, CDCl<sub>3</sub>, 298 K) of 3.

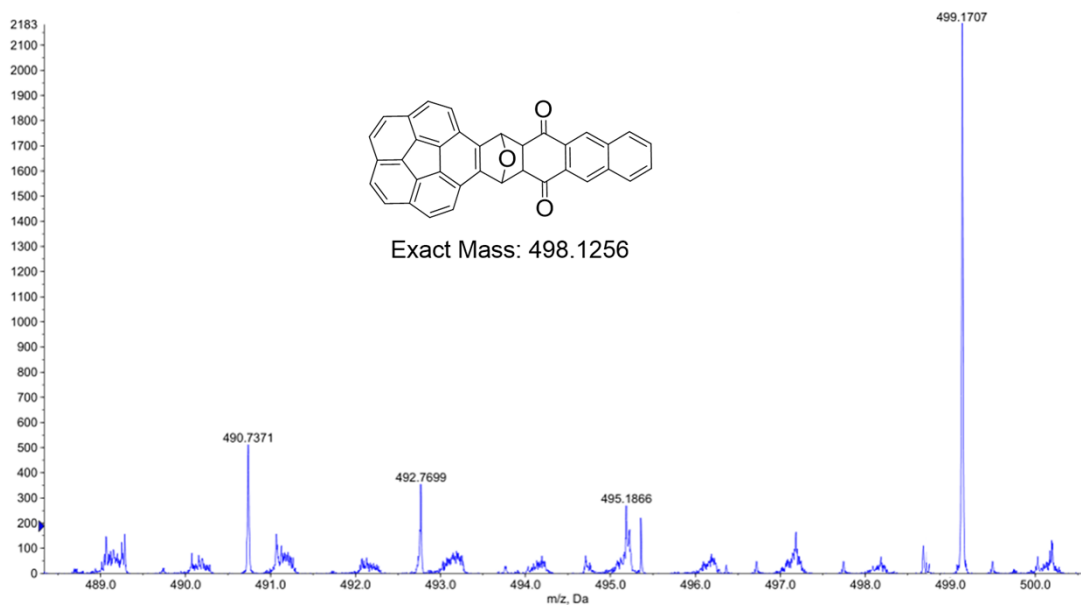

**Figure S22.** High-resolution mass spectrum (ESI) of **3**.

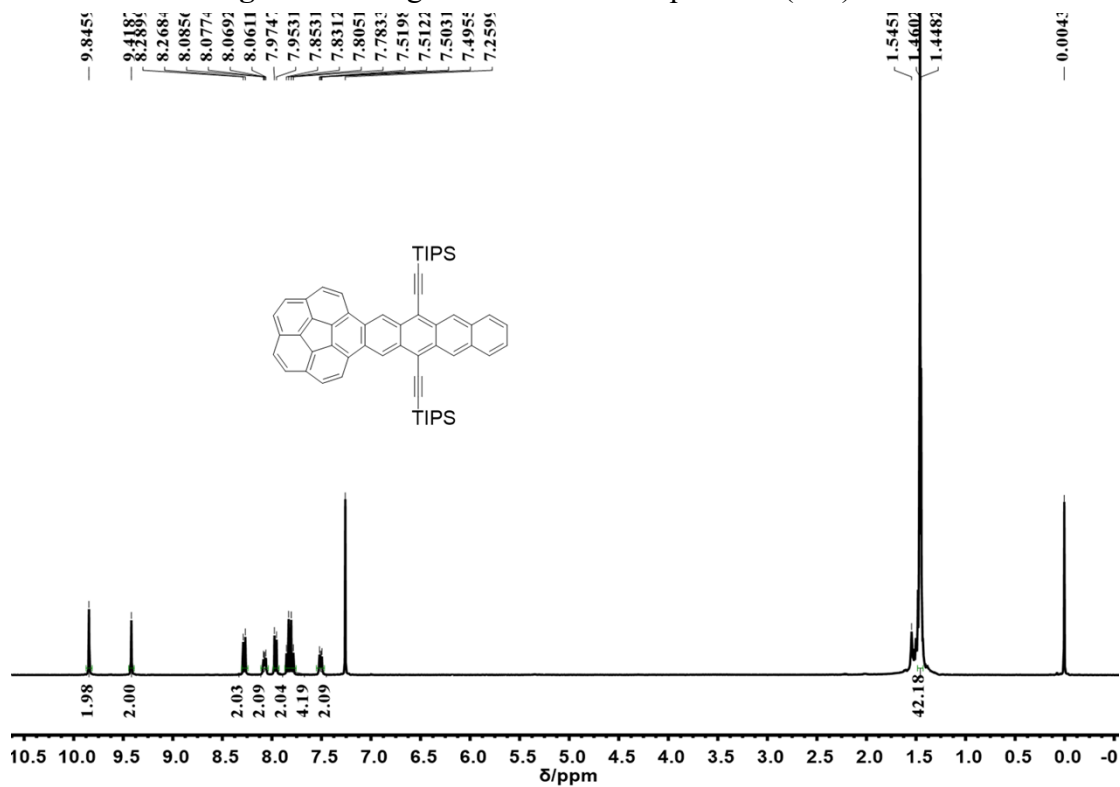

**Figure S23.**  $^1\text{H}$  NMR spectrum (400 MHz,  $\text{CDCl}_3$ , 298 K) of **CORA-monPA**.

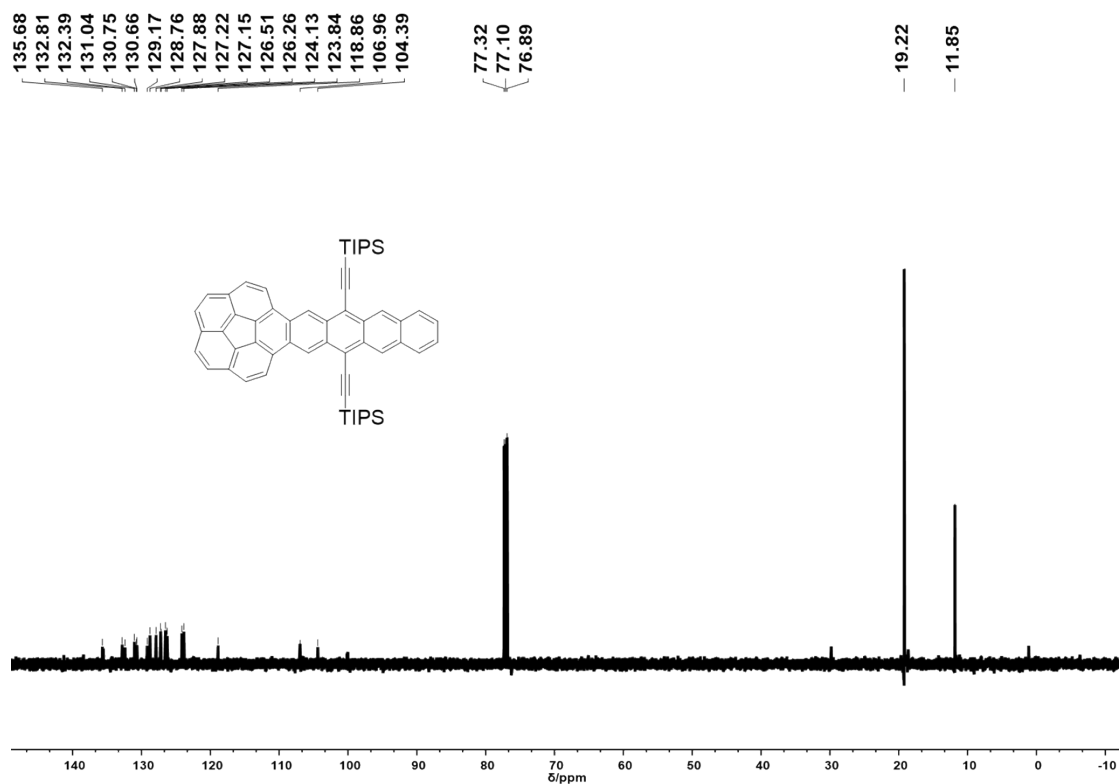

**Figure S24.**  $^{13}\text{C}$  NMR spectrum (100 MHz,  $\text{CDCl}_3$ , 298 K) of CORA-monPA.

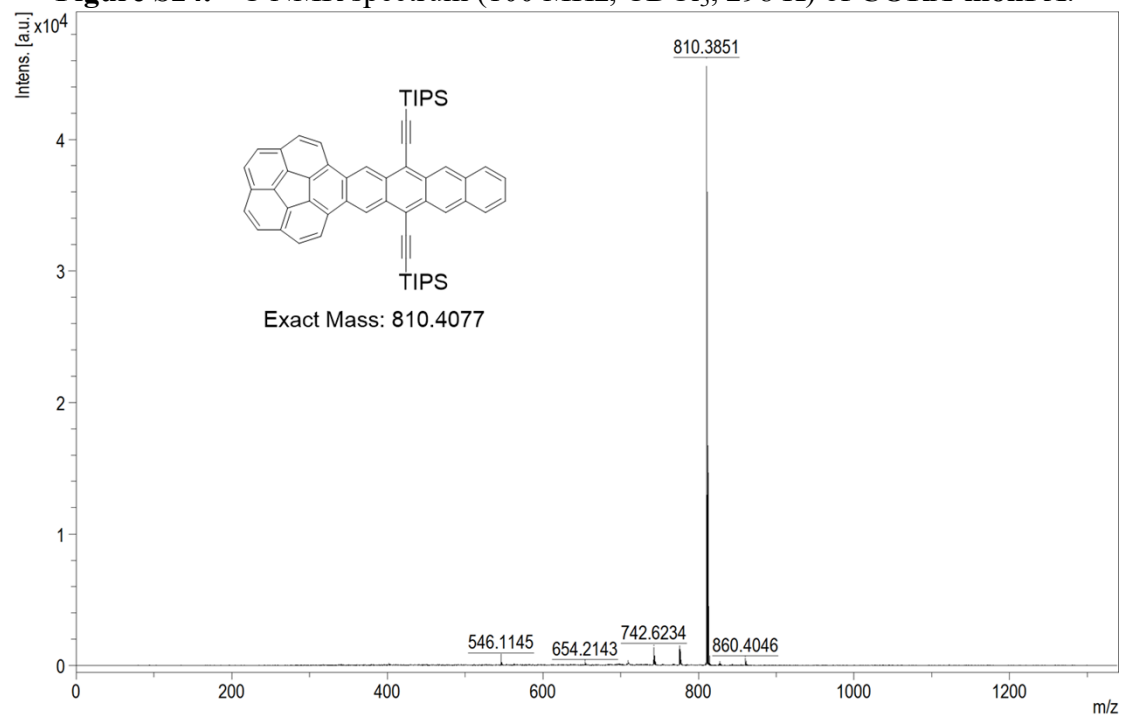

**Figure S25.** High-resolution mass spectrum (MALDI-TOF) of CORA-monPA.

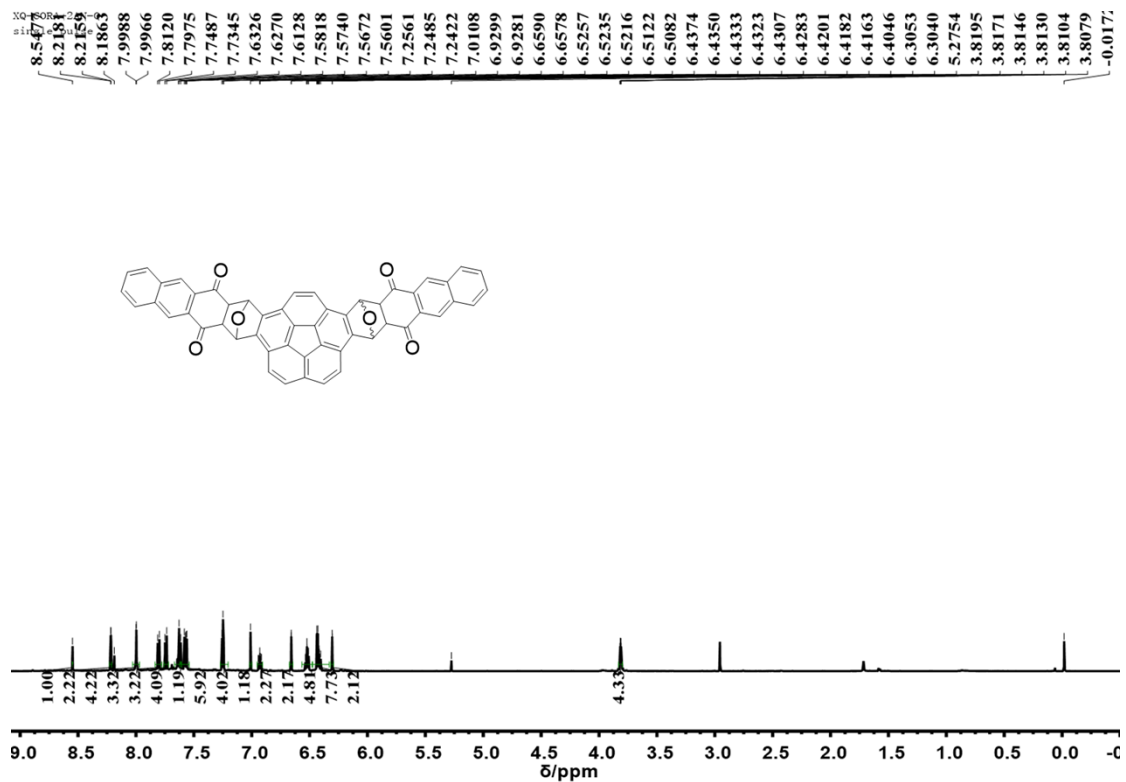

Figure S26.  $^1\text{H}$  NMR spectrum (600 MHz,  $\text{CDCl}_3$ , 298 K) of 6.

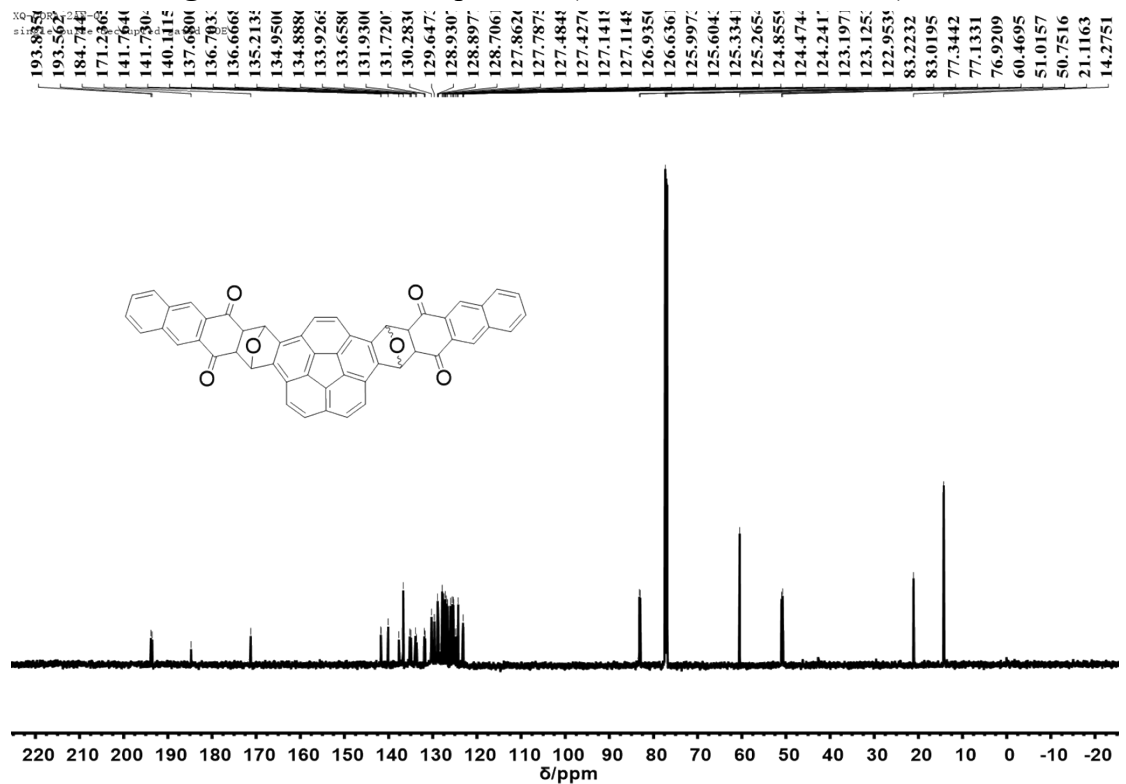

Figure S27.  $^{13}\text{C}$  NMR spectrum (100 MHz,  $\text{CDCl}_3$ , 298 K) of 6.

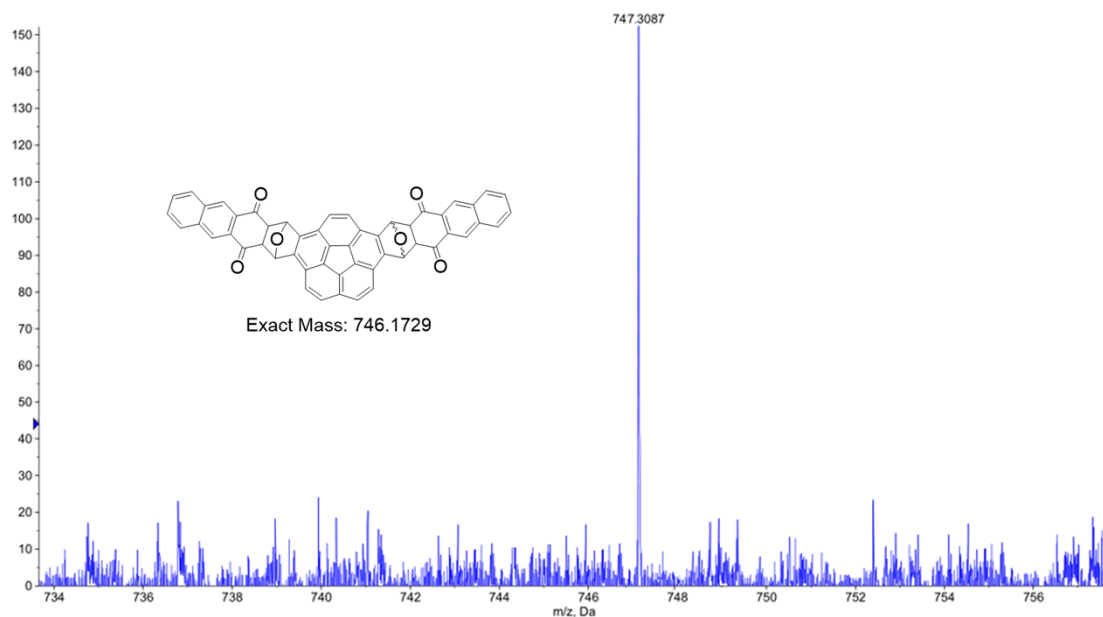

**Figure S28.** High-resolution mass spectrum (ESI) of **6**.

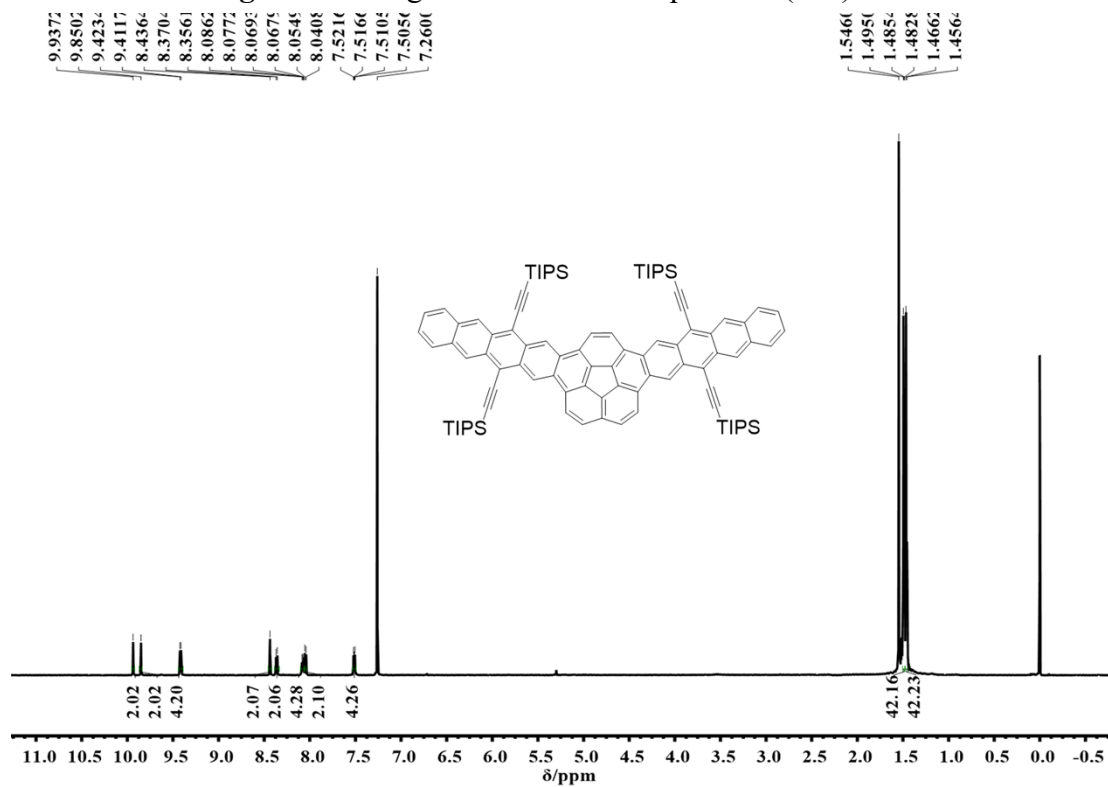

**Figure S29.**  $^1\text{H}$  NMR spectrum (600 MHz,  $\text{CDCl}_3$ , 298 K) of **CORA-bisPA**.

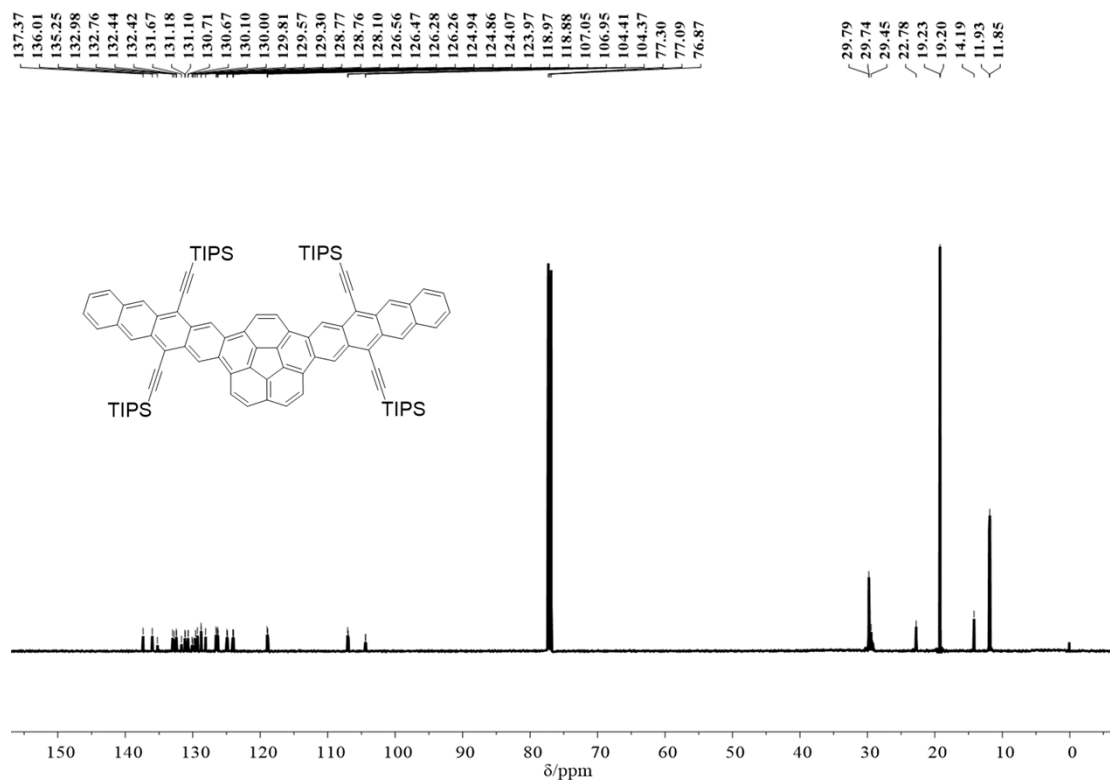

**Figure S30.**  $^{13}\text{C}$  NMR spectrum (100 MHz,  $\text{CDCl}_3$ , 298 K) of CORA-bisPA.

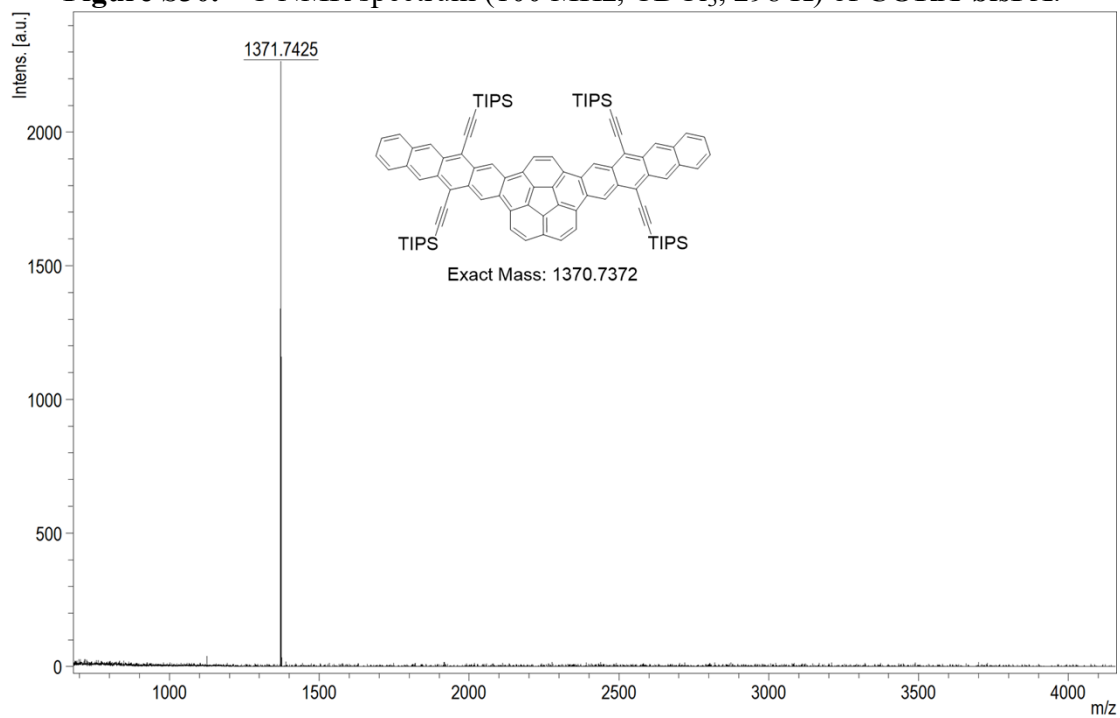

**Figure S31.** High-resolution mass spectrum (MALDI-TOF) of CORA-bisPA.



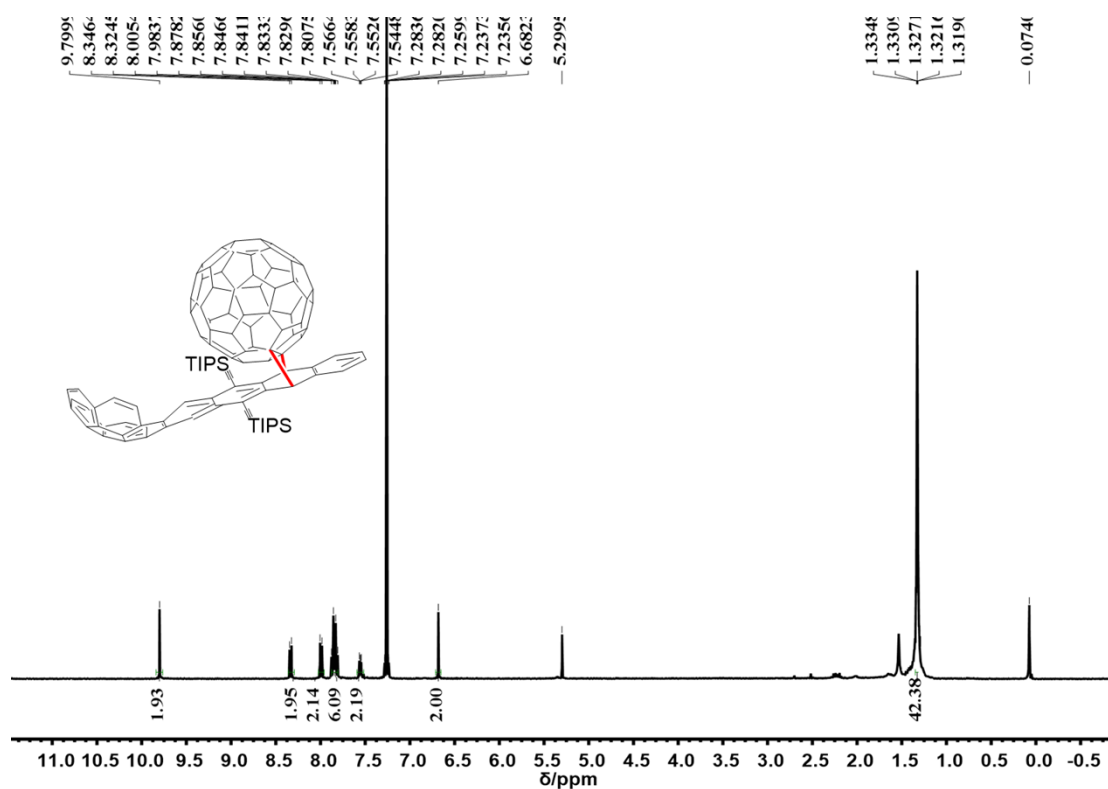

**Figure S32.** <sup>1</sup>H NMR spectrum (400 MHz, CDCl<sub>3</sub>, 298 K) of CORA-monPA-C<sub>60</sub>.

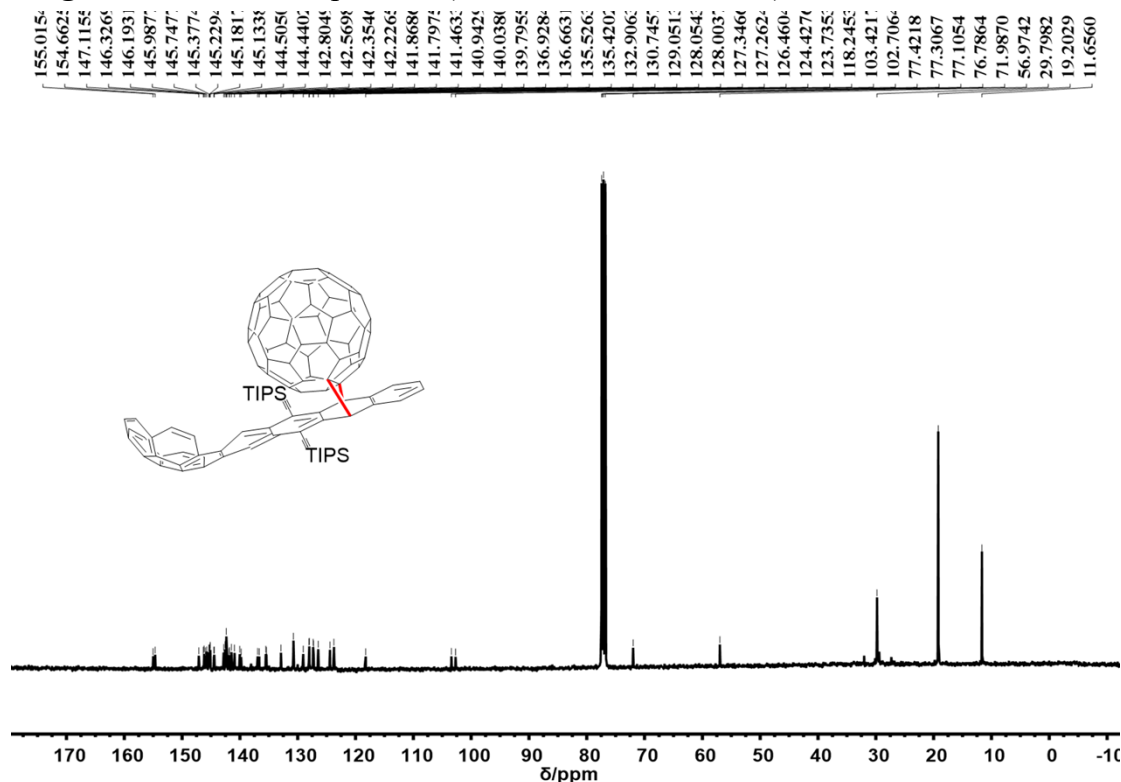

**Figure S33.** <sup>13</sup>C NMR spectrum (100 MHz, CDCl<sub>3</sub>, 298 K) of CORA-monPA-C<sub>60</sub>.

## 9 Reference

(S1) Dolomanov, O. V.; Bourhis, L. J.; Gildea, R. J; Howard, J. A. K.; Puschmann, H.

- J. Appl. Cryst.* **2009**, 42, 339-341.
- (S2) Sheldrick, G. M. *Acta Cryst.* **2015**, A71, 3-8.
- (S3) Sheldrick, G. M. *Acta Cryst.* **2015**, C71, 3-8.
- (S4) Spek, A. L. *Acta Cryst.* **2015**, C71, 9-18.
- (S5) Yamakado, T.; Takahashi, S.; Watanabe, K.; Matsumoto, Y.; Osuka, A.; Saito, S. *Angew. Chem. Int. Ed.* **2018**, 57, 5438-5443.
- (S6) Gaussian 09, Revision D.01, Frisch, M. J.; Trucks, G. W.; Schlegel, H. B.; Scuseria, G. E.; Robb, M. A.; Cheeseman, J. R.; Scalmani, G.; Barone, V.; Mennucci, B.; Petersson, G. A.; Nakatsuji, H.; Caricato, M.; Li, X.; Hratchian, H. P.; Izmaylov, A. F.; Bloino, J.; Zheng, G.; Sonnenberg, J. L.; Hada, M.; Ehara, M.; Toyota, K.; Fukuda, R.; Hasegawa, J.; Ishida, M.; Nakajima, T.; Honda, Y.; Kitao, O.; Nakai, H.; Vreven, T.; Montgomery, J. A., Jr.; Peralta, J. E.; Ogliaro, F.; Bearpark, M.; Heyd, J. J.; Brothers, E.; Kudin, K. N.; Staroverov, V. N.; Kobayashi, R.; Normand, J.; Raghavachari, K.; Rendell, A.; Burant, J. C.; Iyengar, S. S.; Tomasi, J.; Cossi, M.; Rega, N.; Millam, M. J.; Klene, M.; Knox, J. E.; Cross, J. B.; Bakken, V.; Adamo, C.; Jaramillo, J.; Gomperts, R.; Stratmann, R. E.; Yazyev, O.; Austin, A. J.; Cammi, R.; Pomelli, C.; Ochterski, J. W.; Martin, R. L.; Morokuma, K.; Zakrzewski, V. G.; Voth, G. A.; Salvador, P.; Dannenberg, J. J.; Dapprich, S.; Daniels, A. D.; Farkas, Ö.; Foresman, J. B.; Ortiz, J. V.; Cioslowski, J.; Fox, D. J. Gaussian, Inc., Wallingford CT, 2013.
- (S7) (a) Poater, J.; Bofill, J. M.; Alemany, P.; Solà, M. *J. Org. Chem.* **2006**, 71, 1700-1702. (b) Fallah-Bagher-Shaidaei, H.; Wannere, C. S.; Corminboeuf, C.; Puchta, R.; Schleyer, P. v. R. *Org. Lett.* **2006**, 8, 863-866. (c) Chen, W.; Li, X.; Long, G.; Li, Y.; Ganguly, R.; Zhang, M.; Aratani, N.; Yamada, H.; Liu, M.; Zhang, Q. *Angew. Chem. Int. Ed.* **2018**, 57, 13555-13559.
- (S8) (a) Herges, R.; Geuenich, D. *J. Phy. Chem. A.* **2001**, 105, 3214-3220. (b) Geuenich, D.; Hess, K.; Kohler, F.; Herges, R. *Chem. Rev.* **2005**, 105, 3758-3772.
- (S9) Cao, Y.; Liang, Y.; Zhang, L.; Osuna, S.; Hoyt, A.-L. M.; Briseno, A. L.; Houk, K. N. *J. Am. Chem. Soc.* **2014**, 136, 10743-10751.
